# Supplementary material
Source: PubMed Central journal article supplement (PMC9529910)
Supplement: NIHMS1828736-supplement-1.pdf [file NIHMS1828736-supplement-1.pdf]

A427 (Arg1 SD = 2.5)

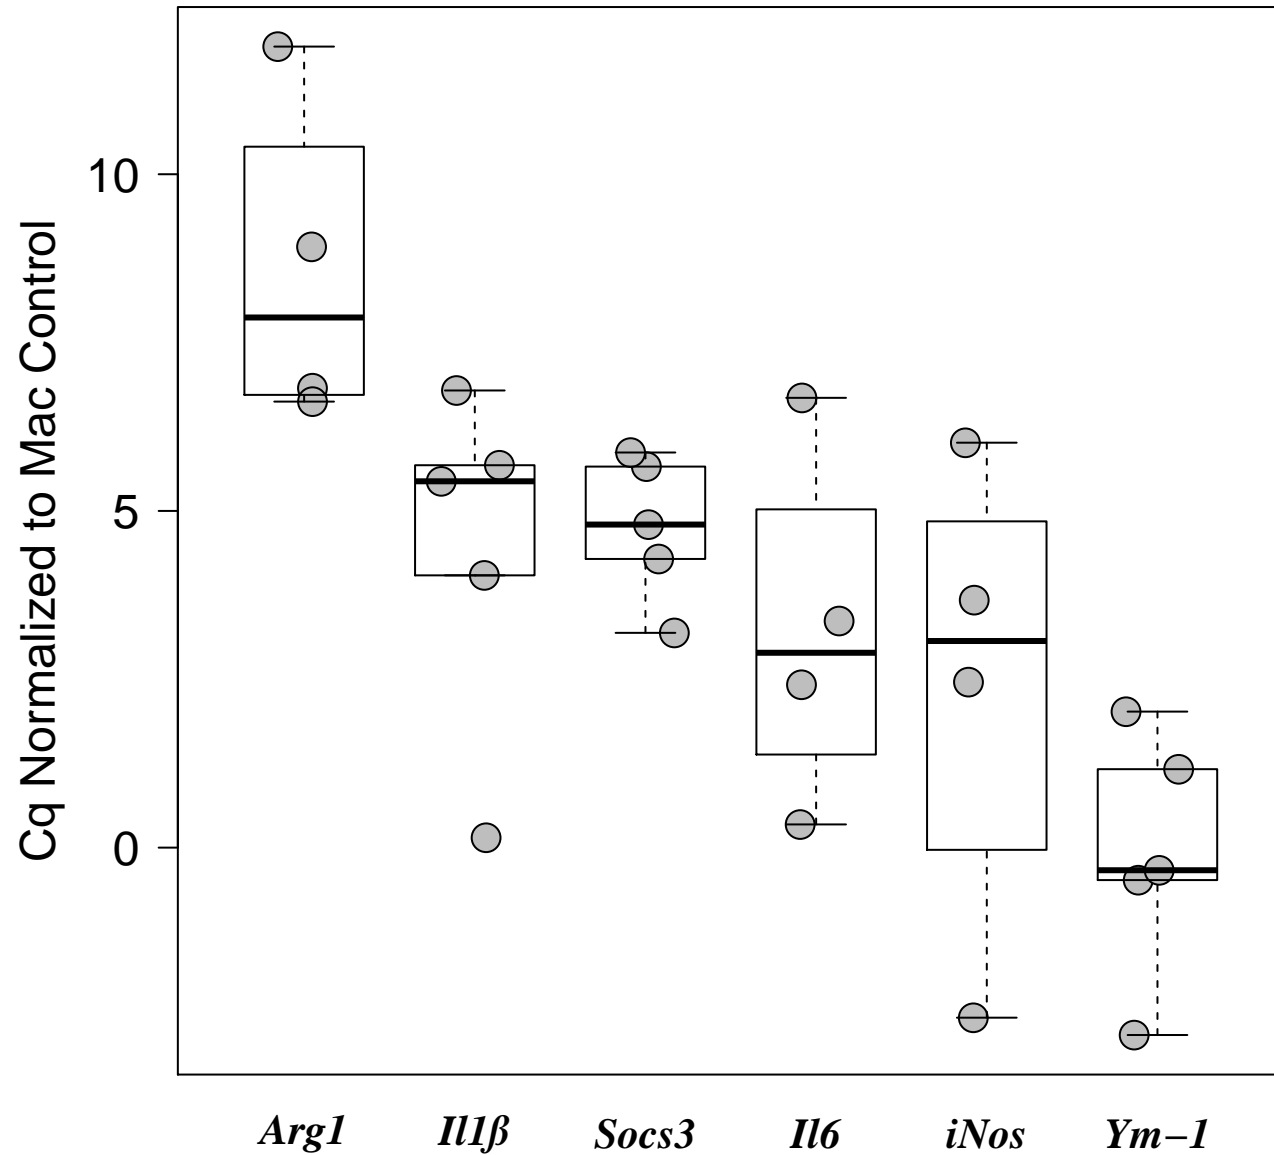

A549 (Arg1 SD = 1.2)

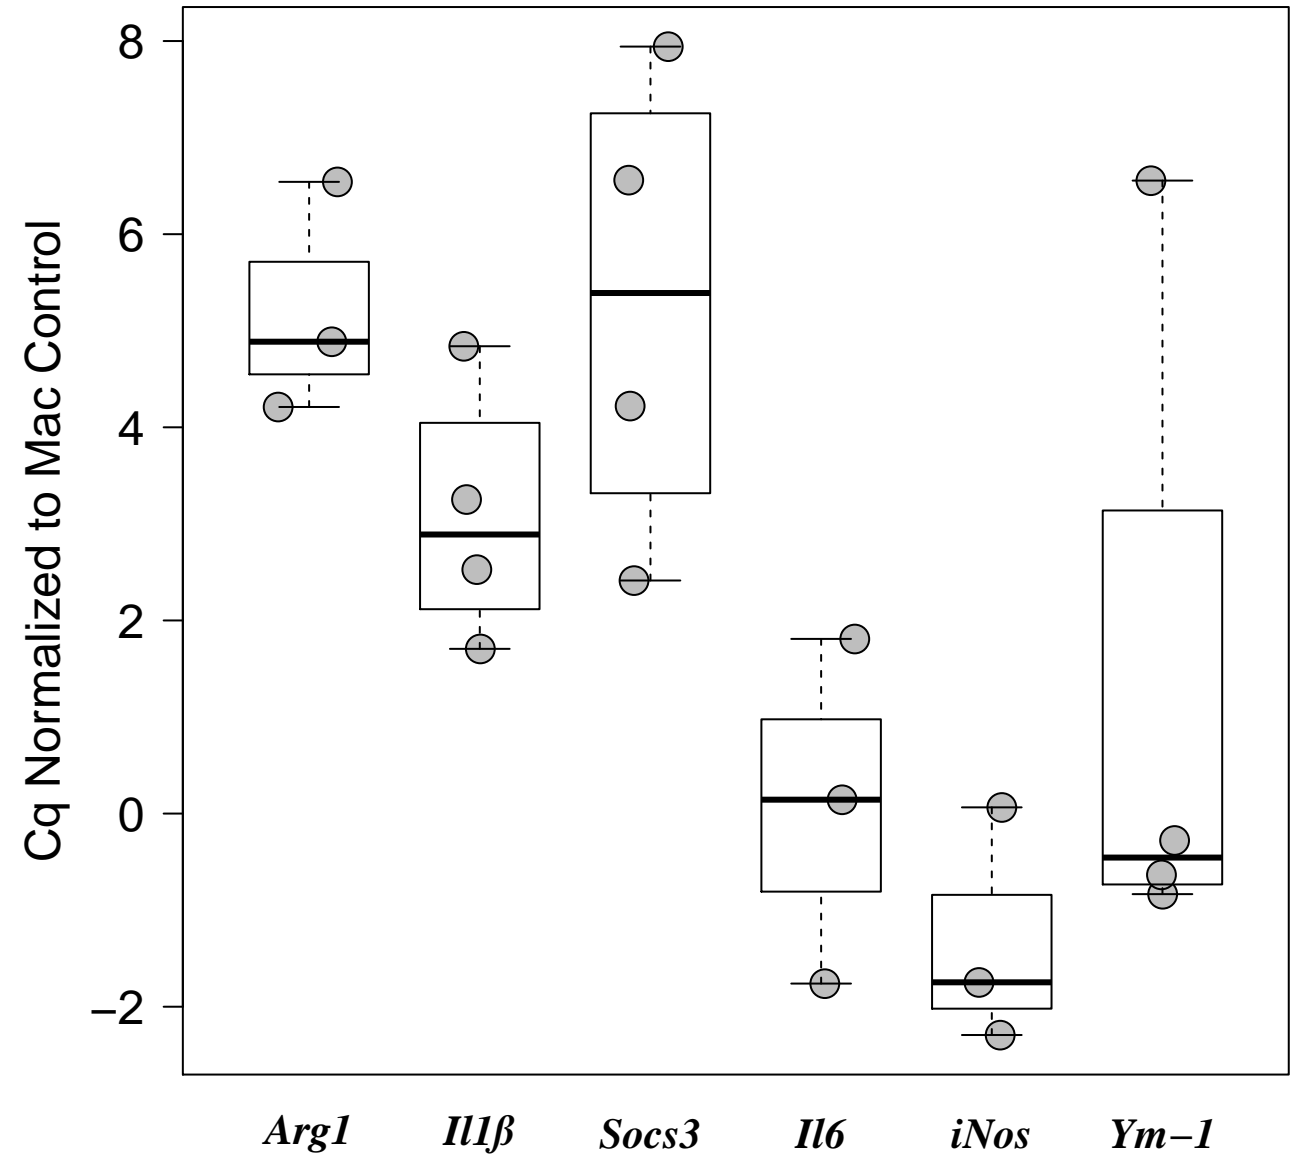

Calu-1 (Arg1 SD = 1.3)

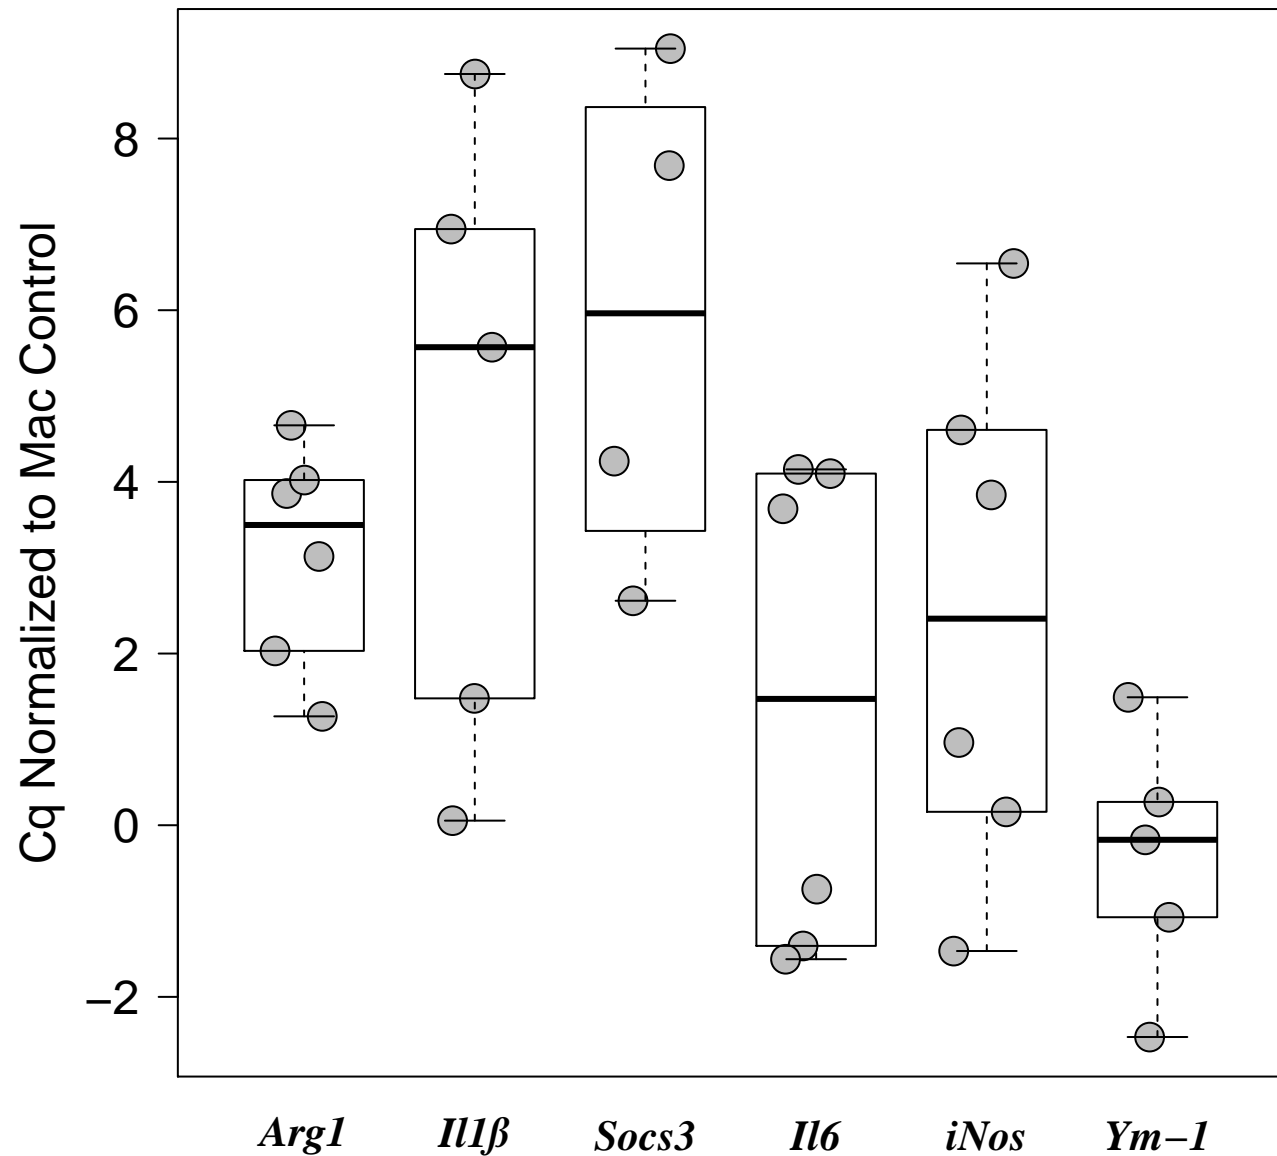

Calu-6 (Arg1 SD = 2.5)

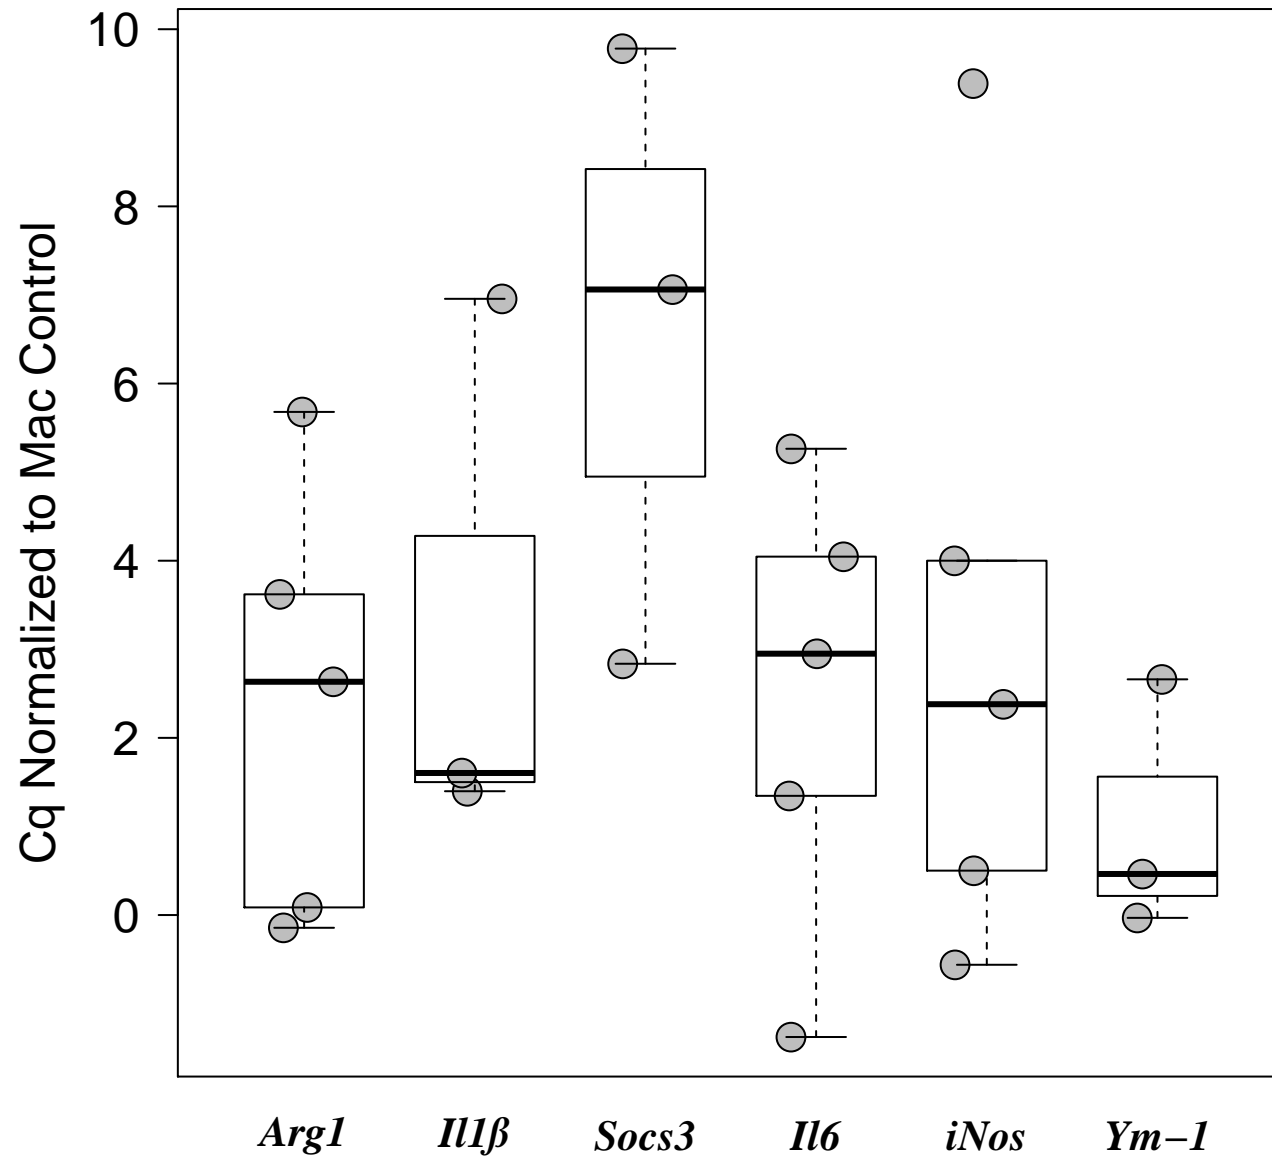

DFCI024 (Arg1 SD = 2.5)

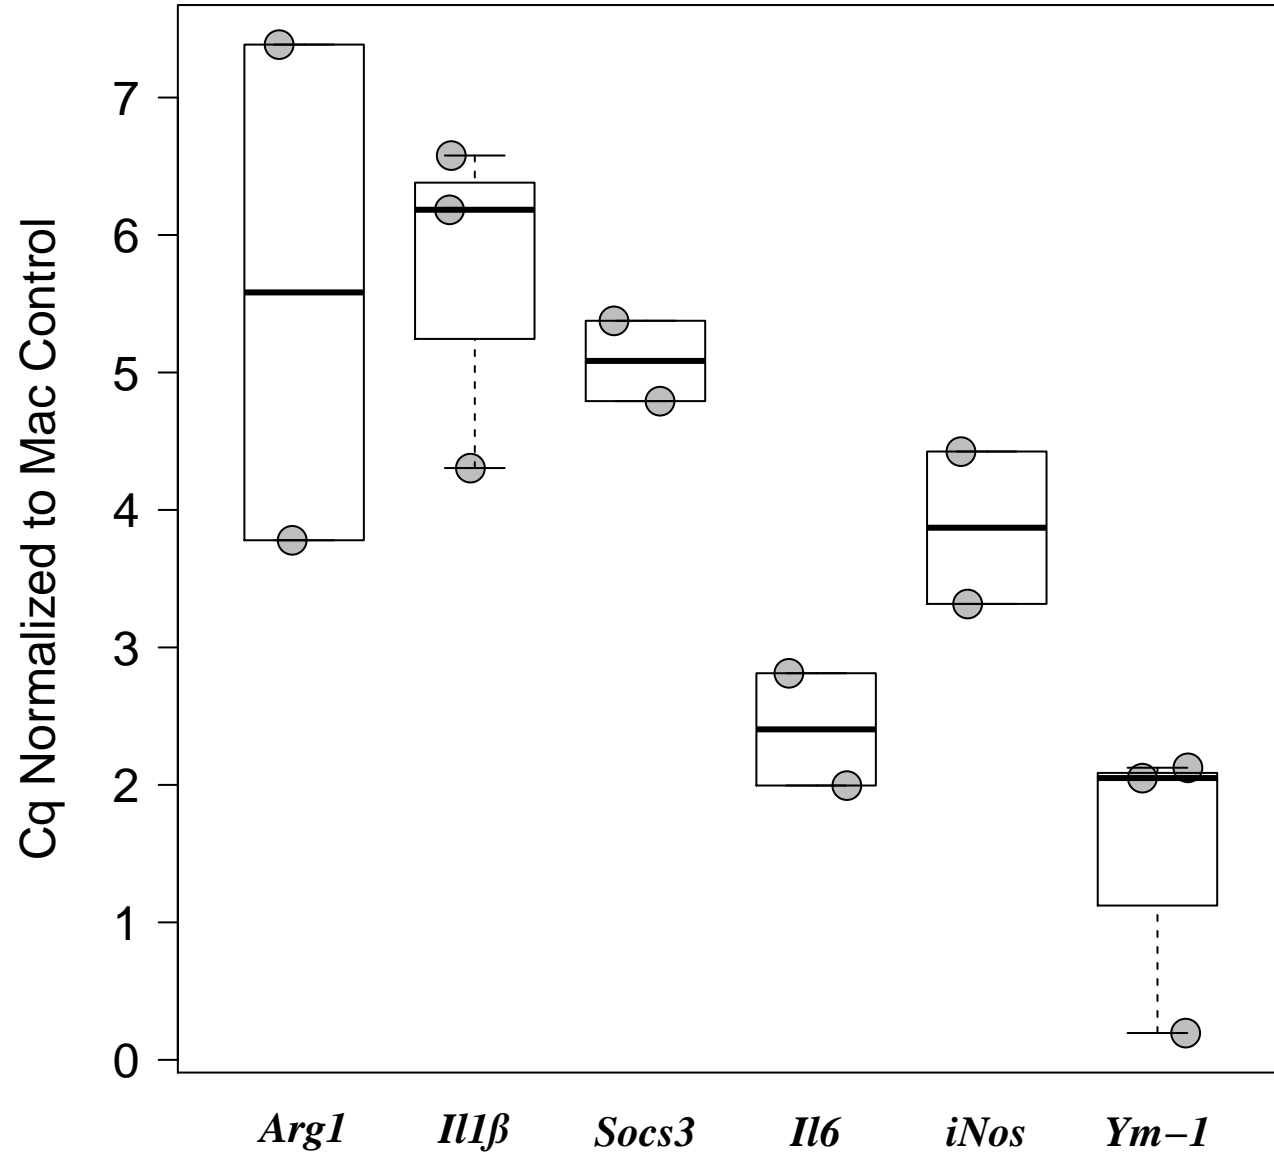

EKVX (Arg1 SD = 2.1)

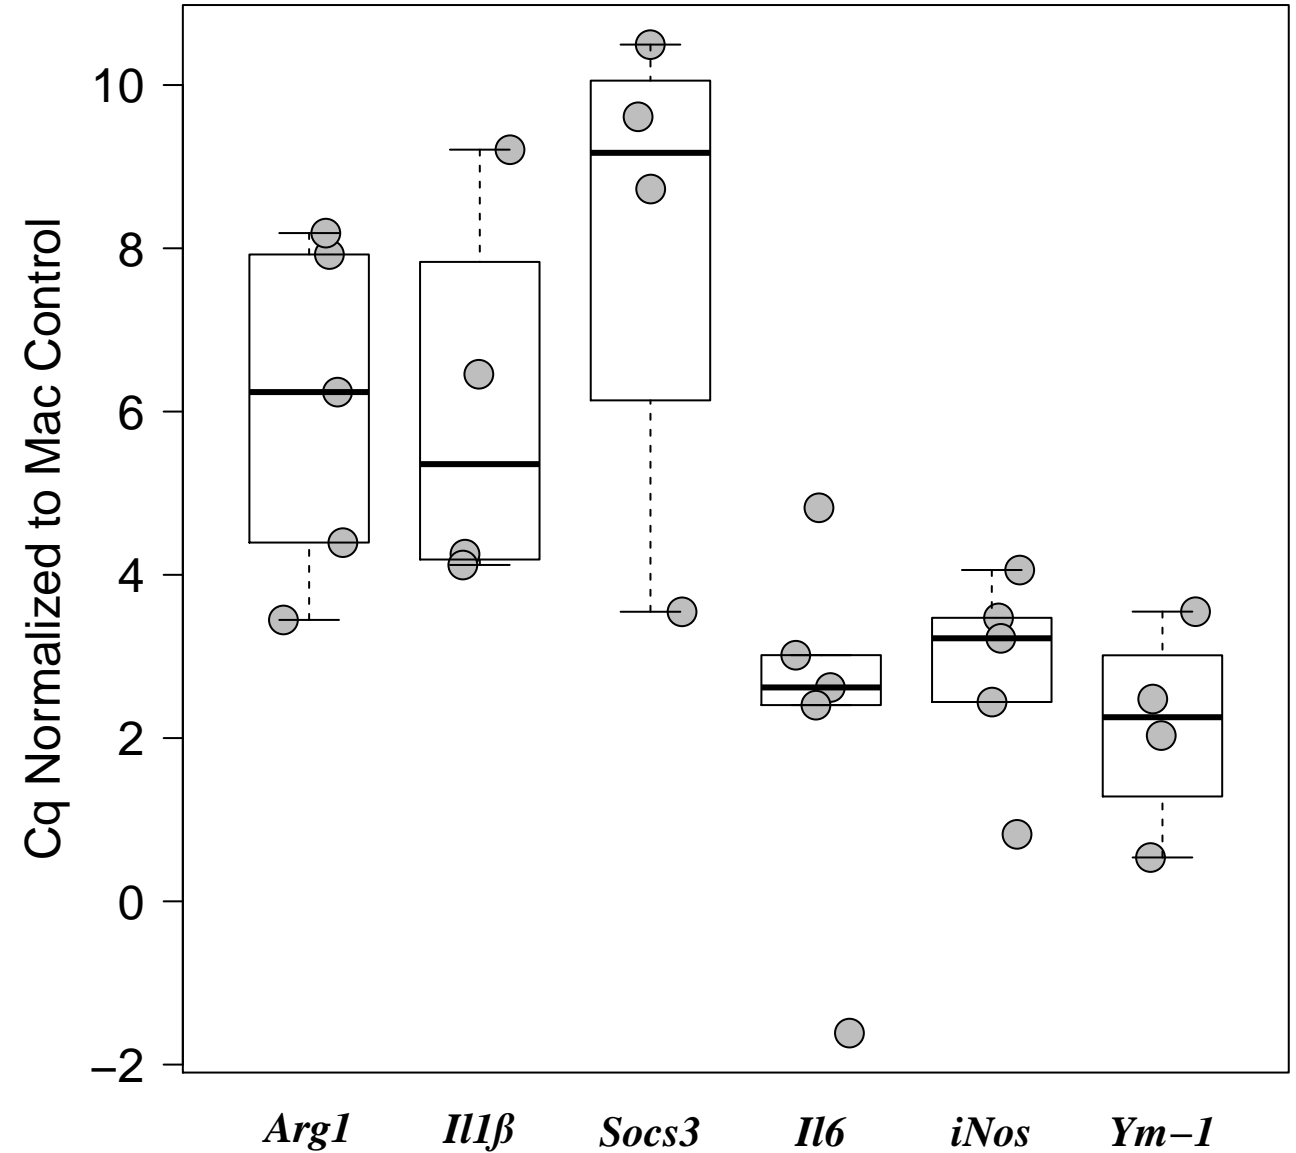

H1048 (Arg1 SD = 2.7)

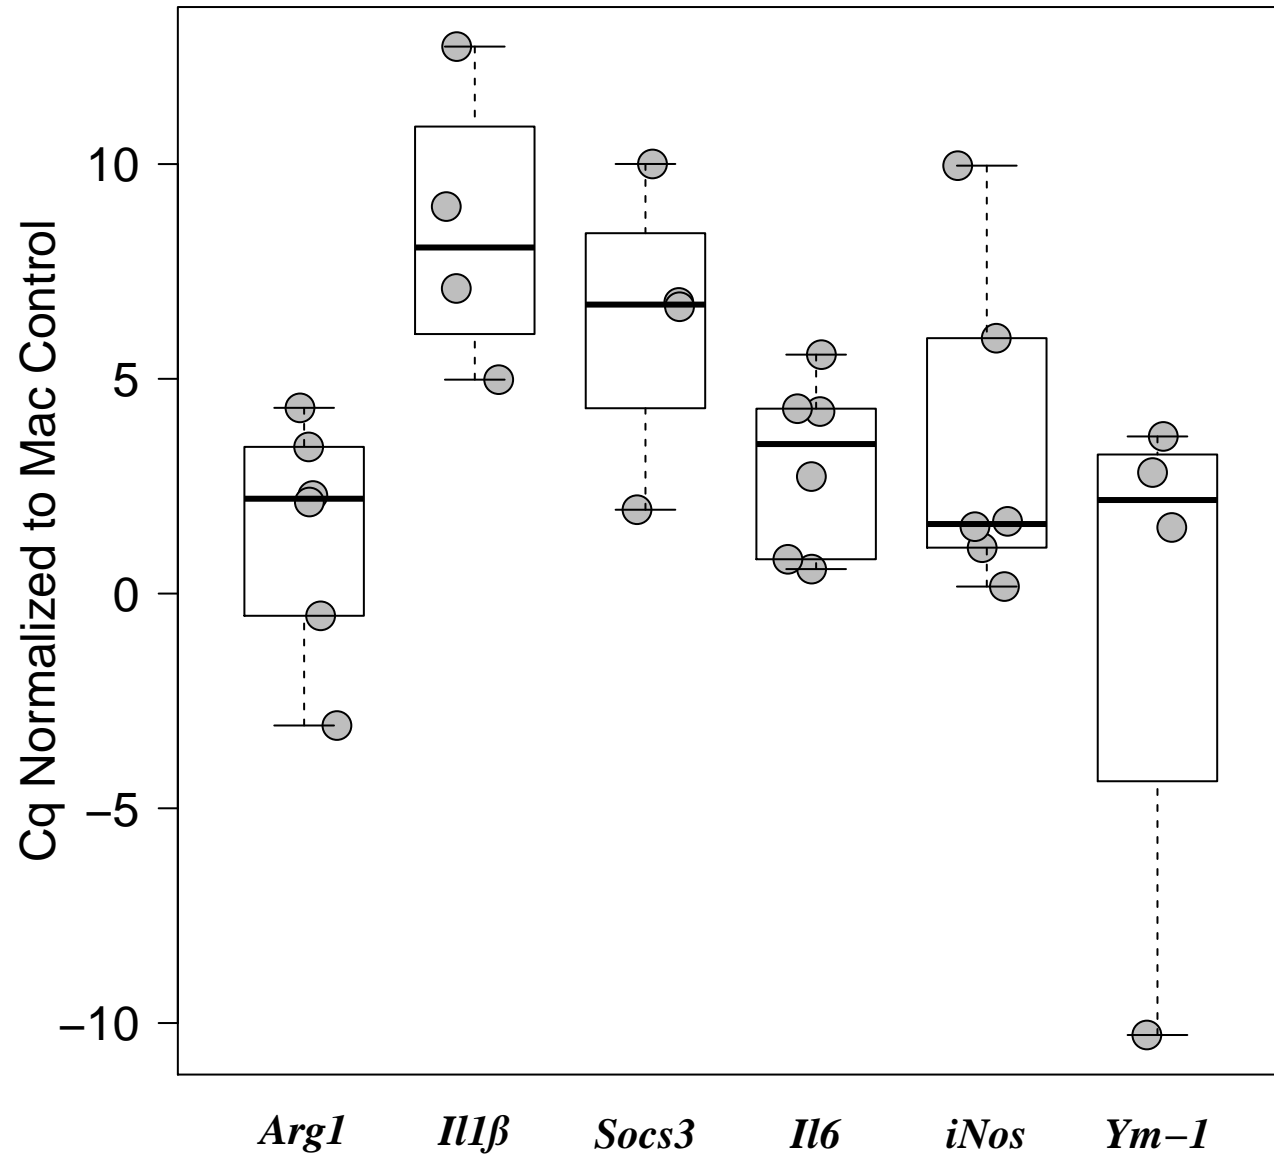

H1299 (Arg1 SD = 2.2)

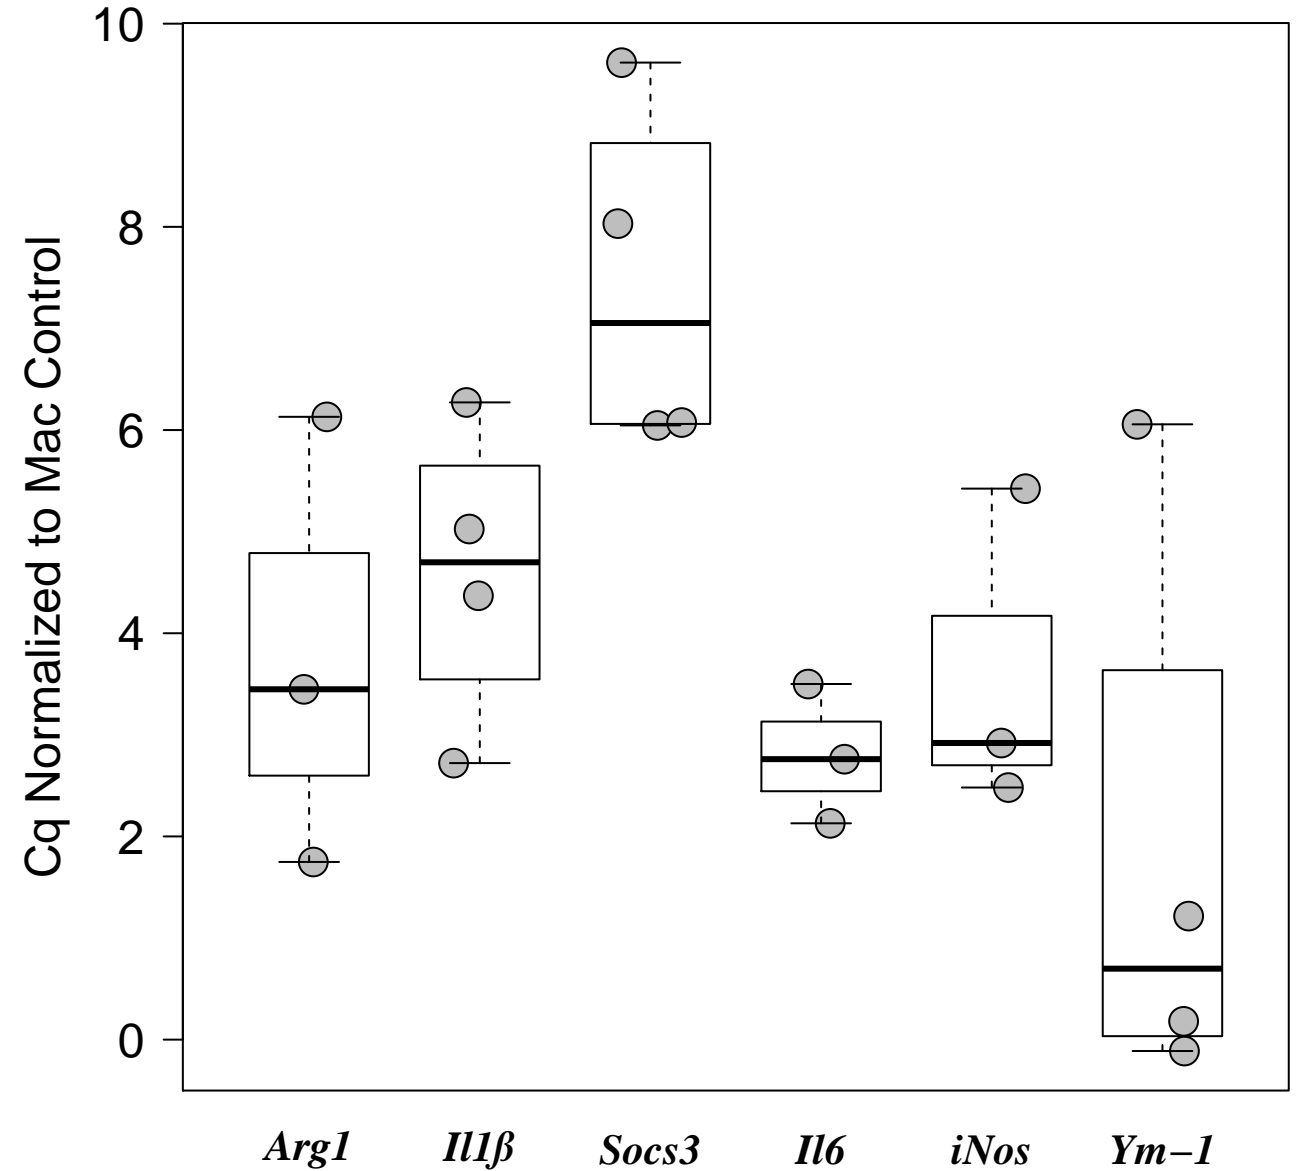

H1355 (Arg1 SD = 3.5)

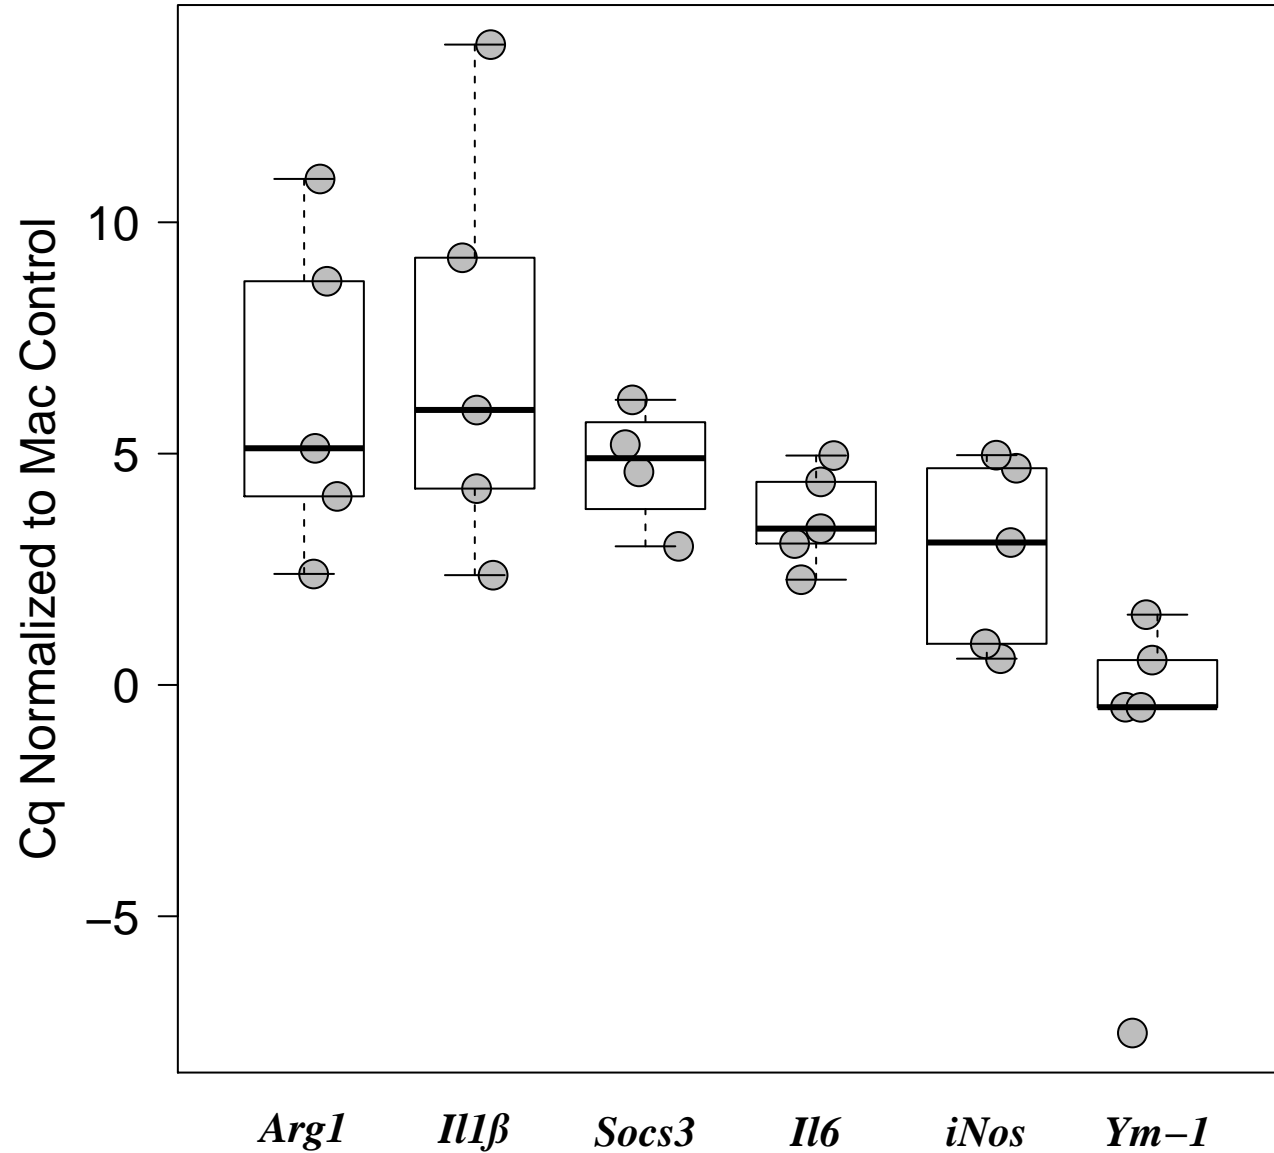

H1373 (Arg1 SD = 2.4)

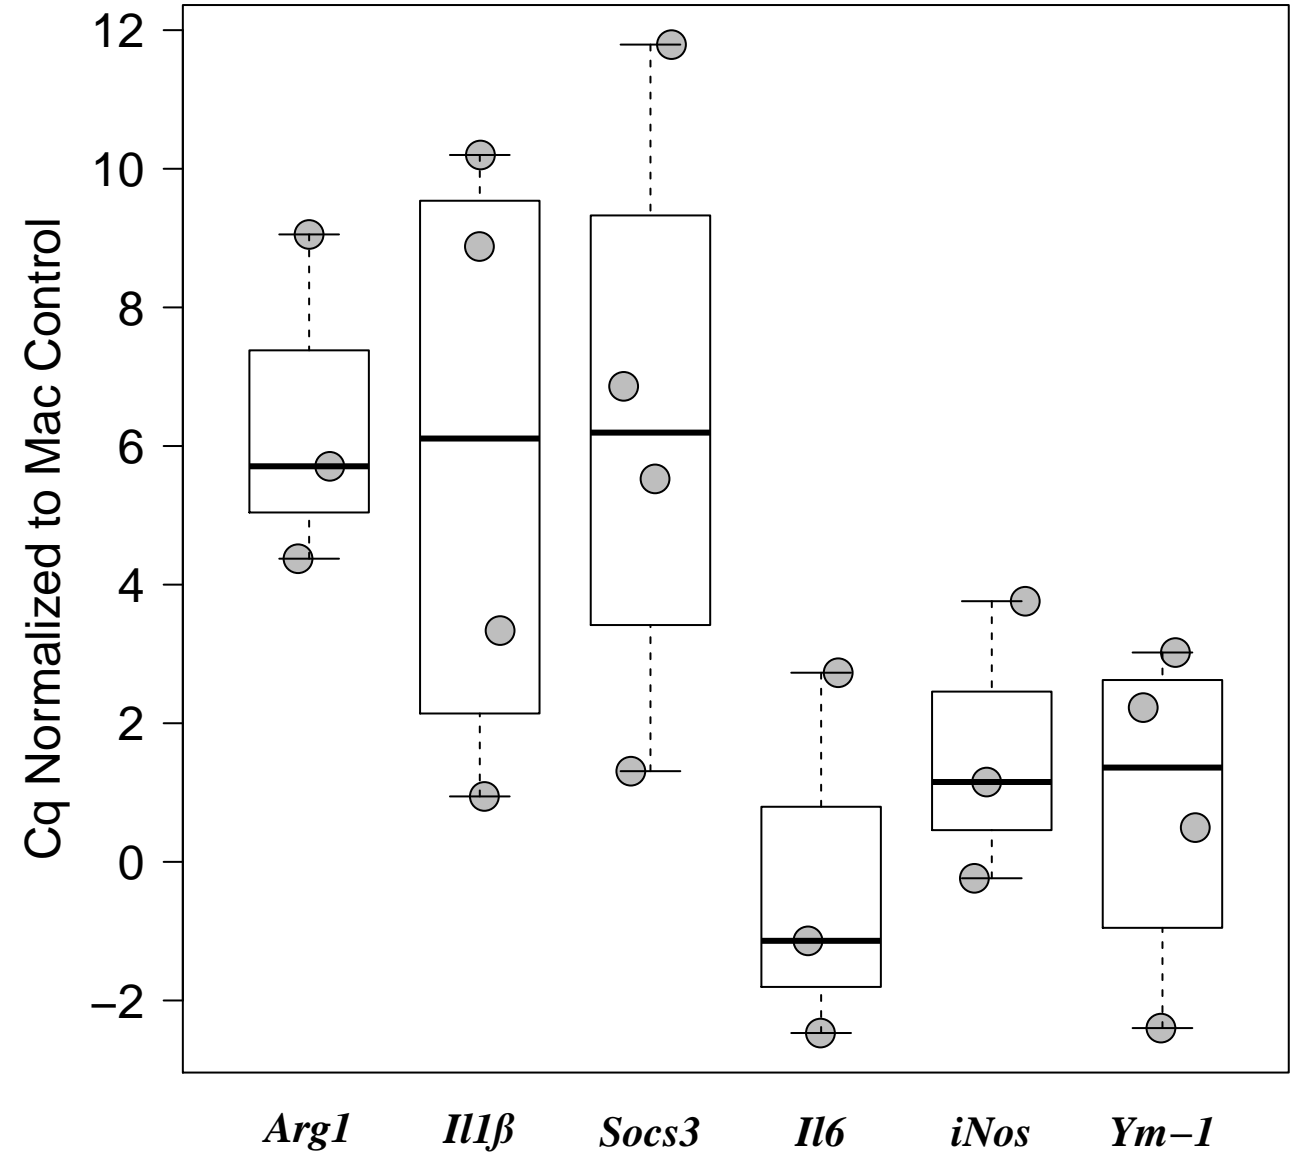

H1395 (Arg1 SD = 2.9)

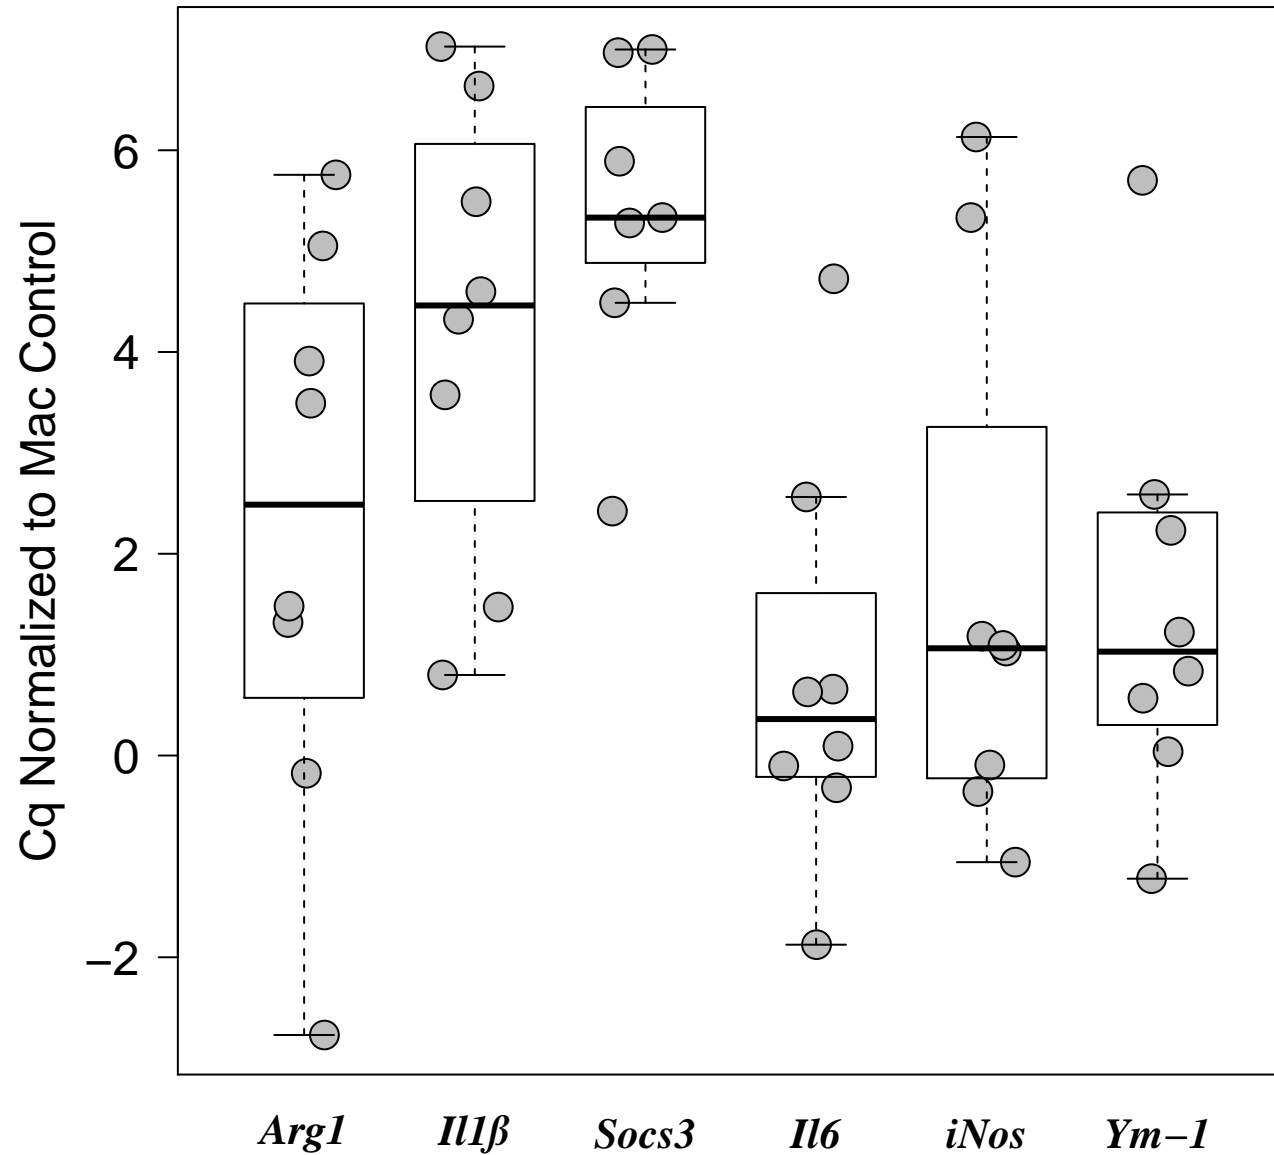

H1437 (Arg1 SD = 2.9)

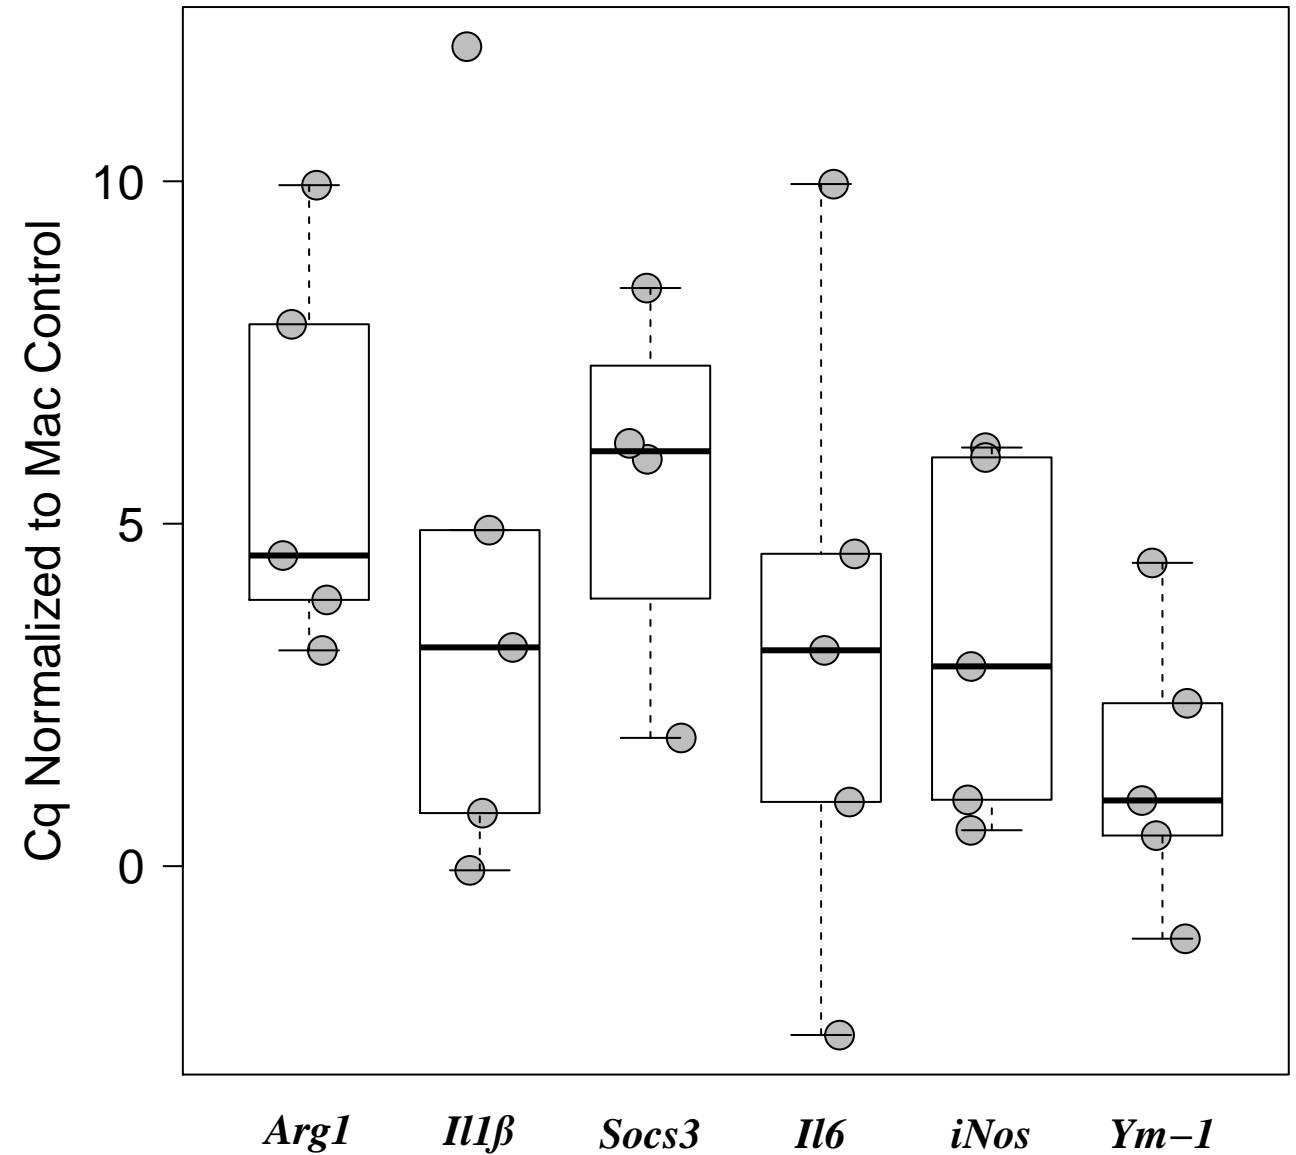

H1563 (Arg1 SD = 3.6)

H157 (Arg1 SD = 3)

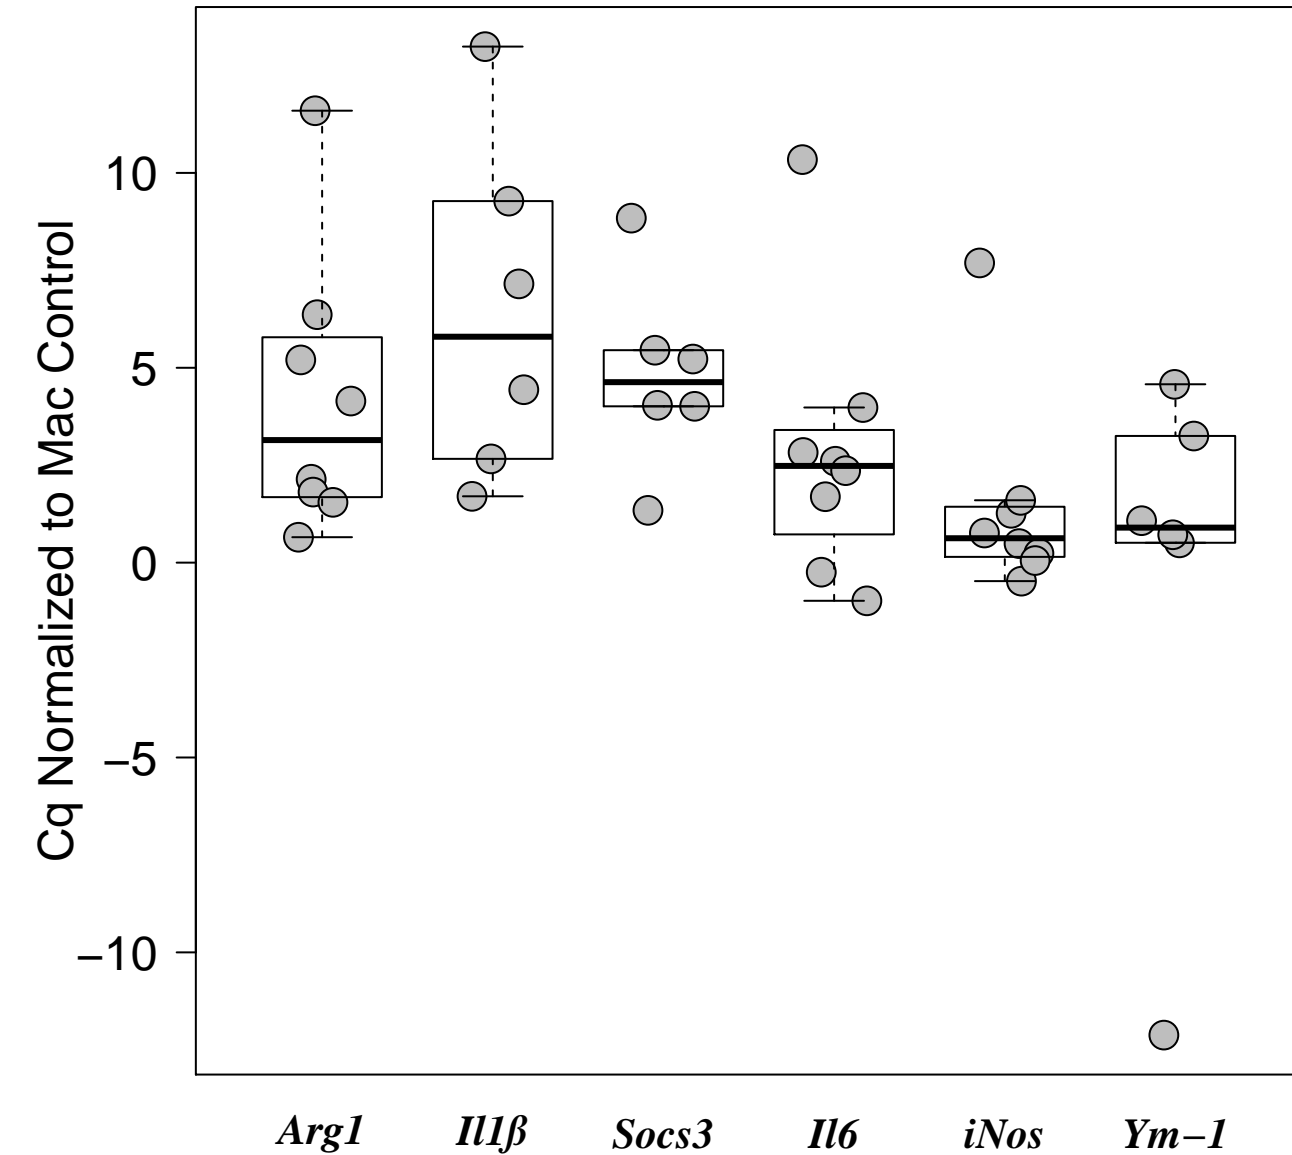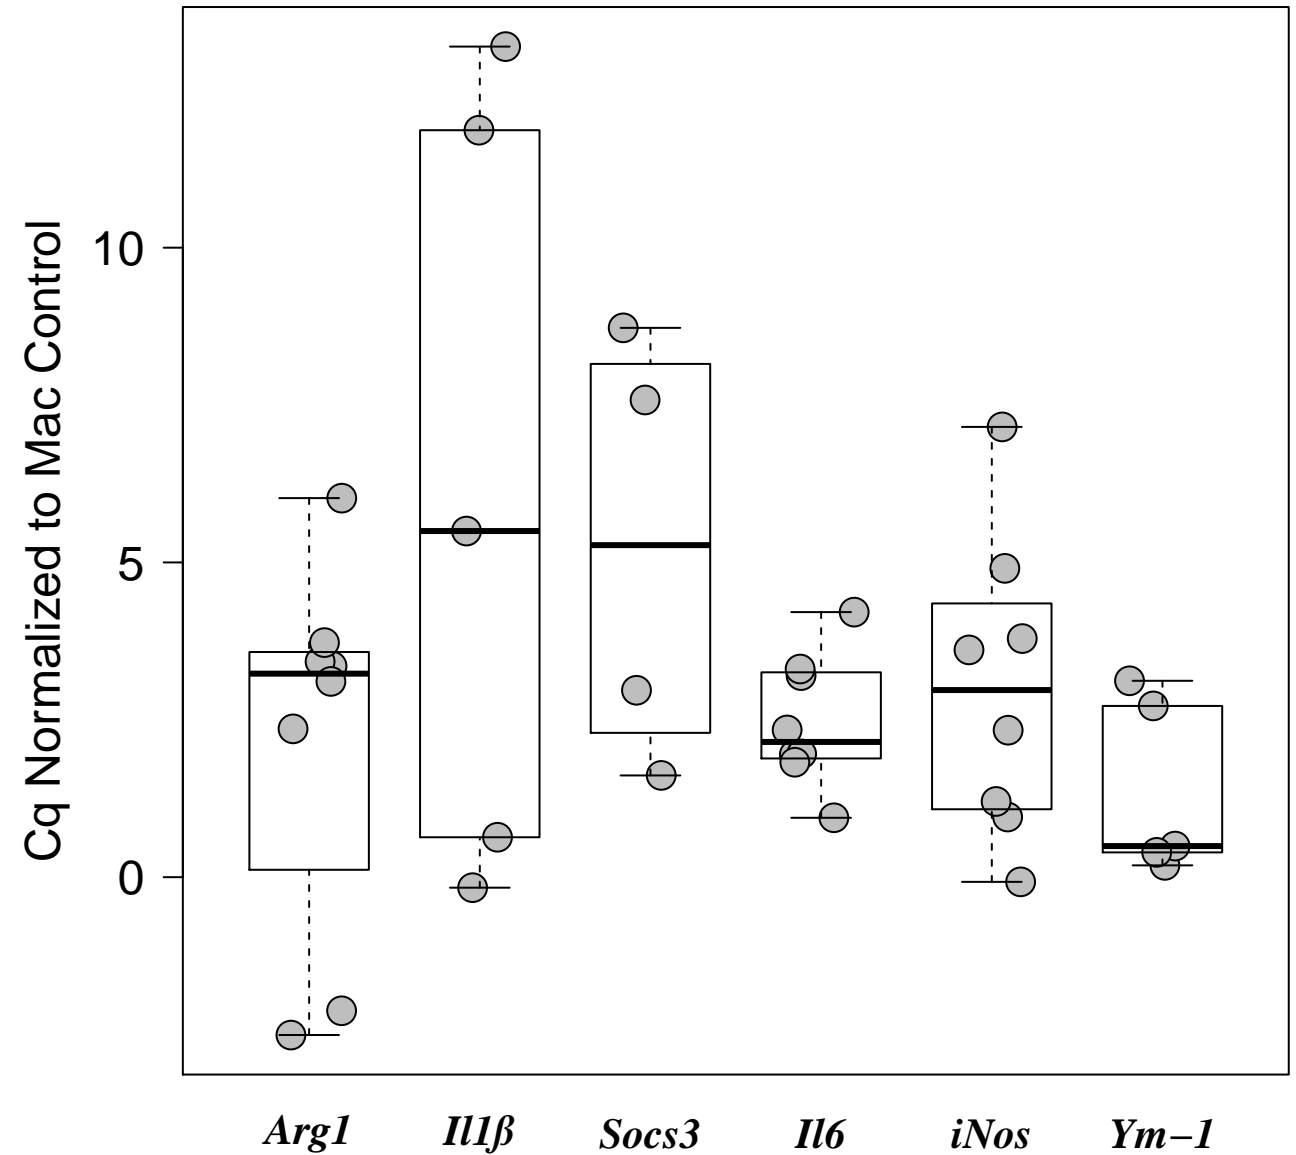

H1573 (Arg1 SD = 0.5)

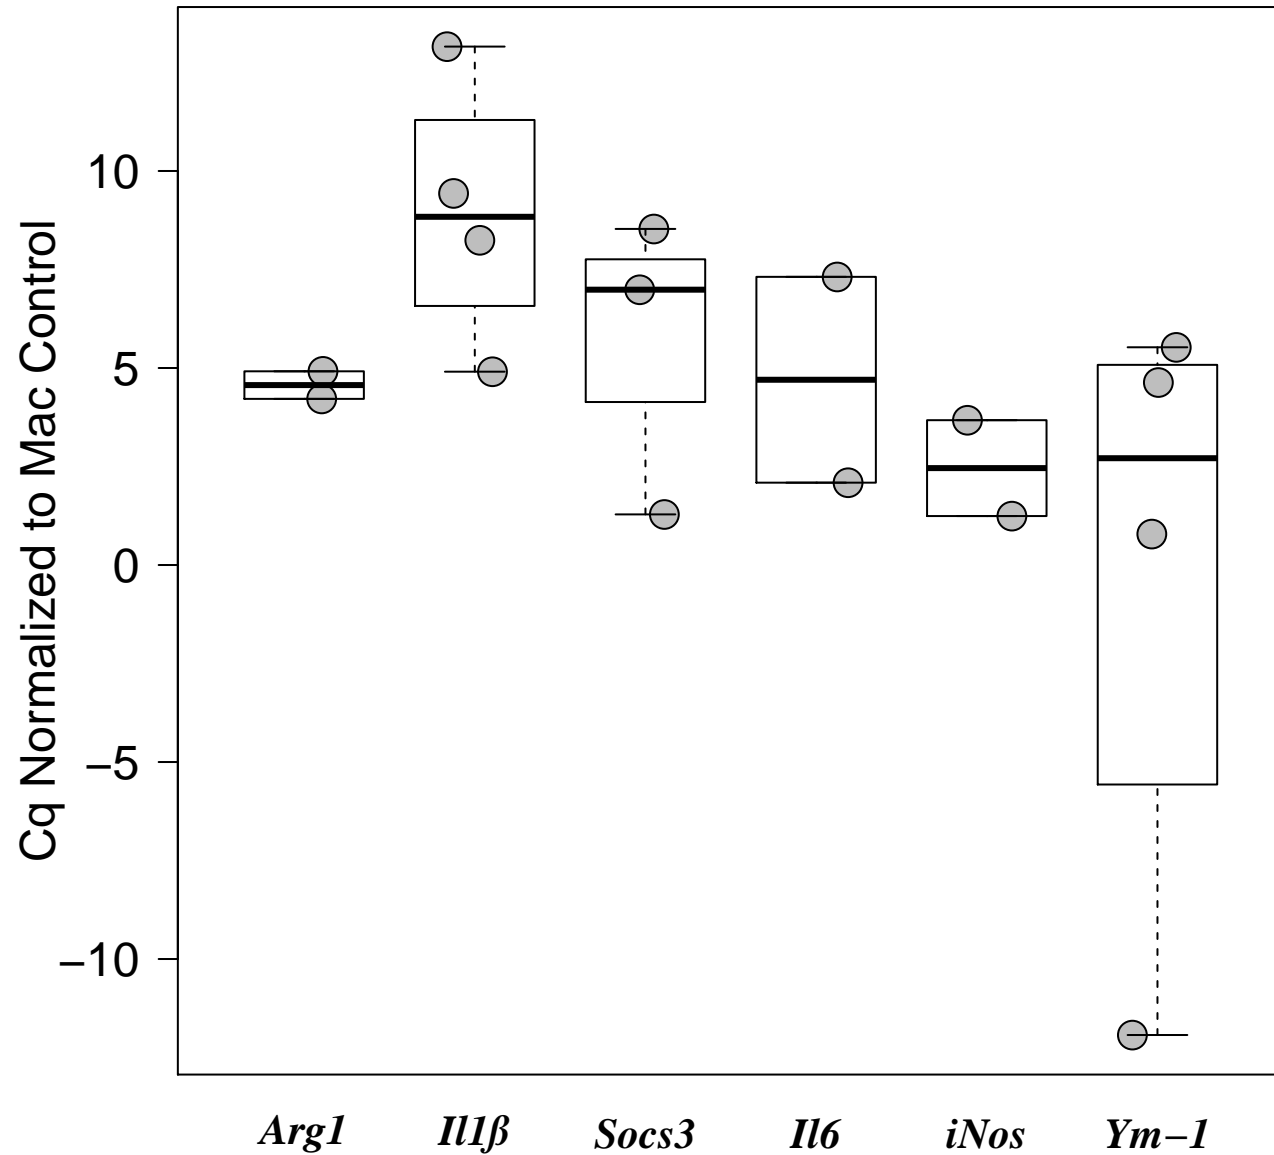

H1650 (Arg1 SD = 0.5)

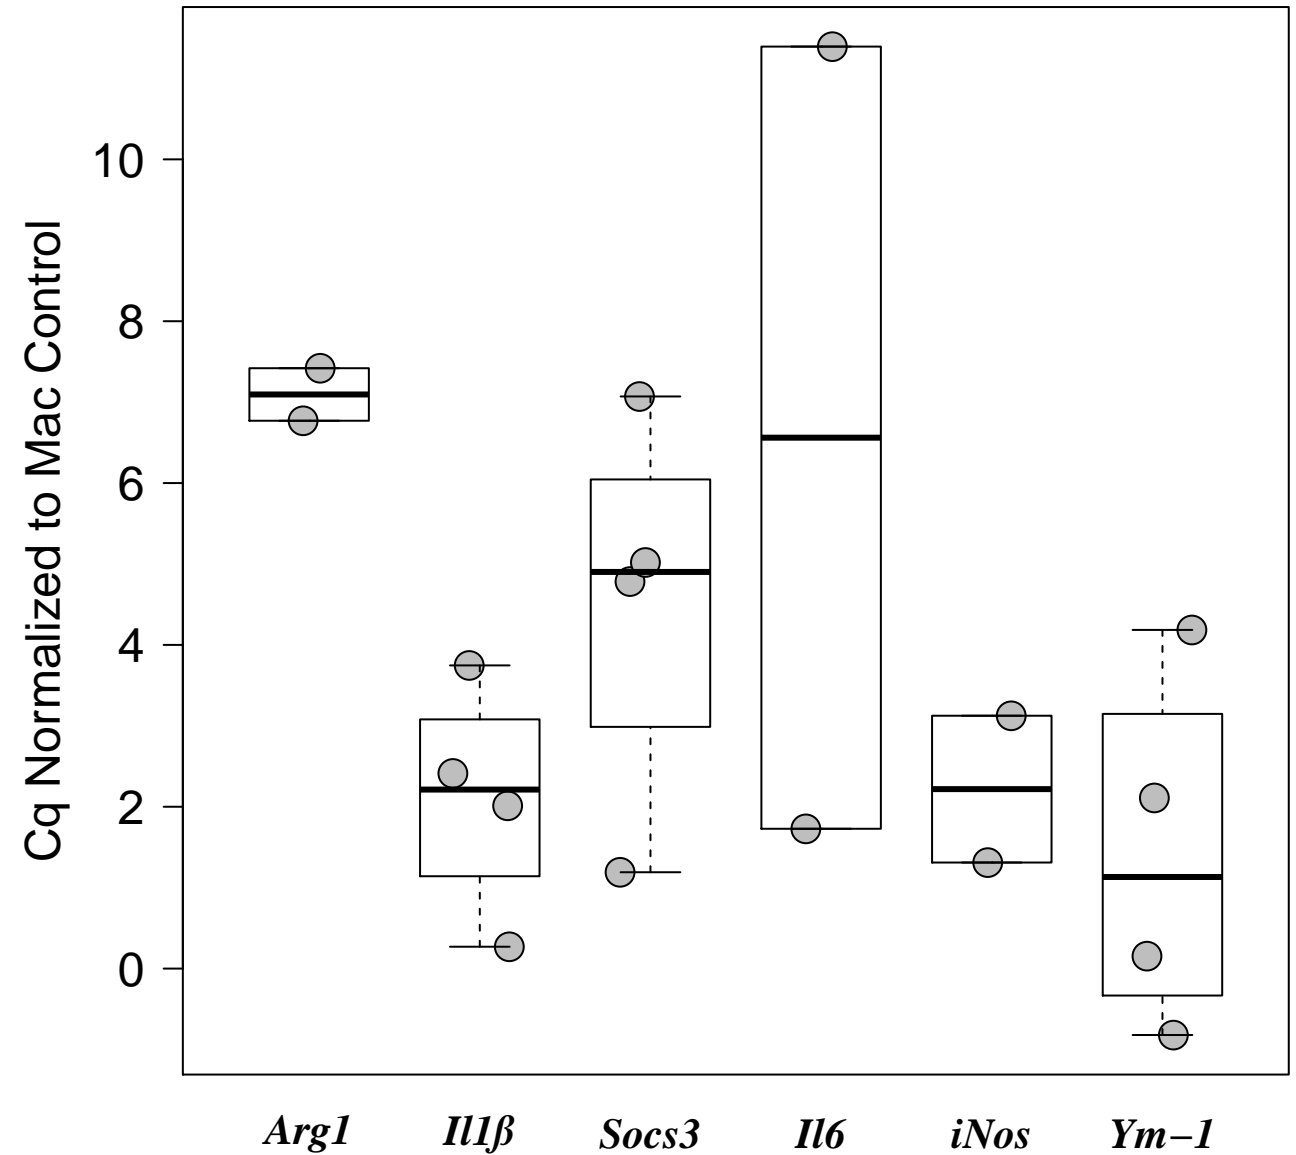



H1666 (Arg1 SD = 2.1)

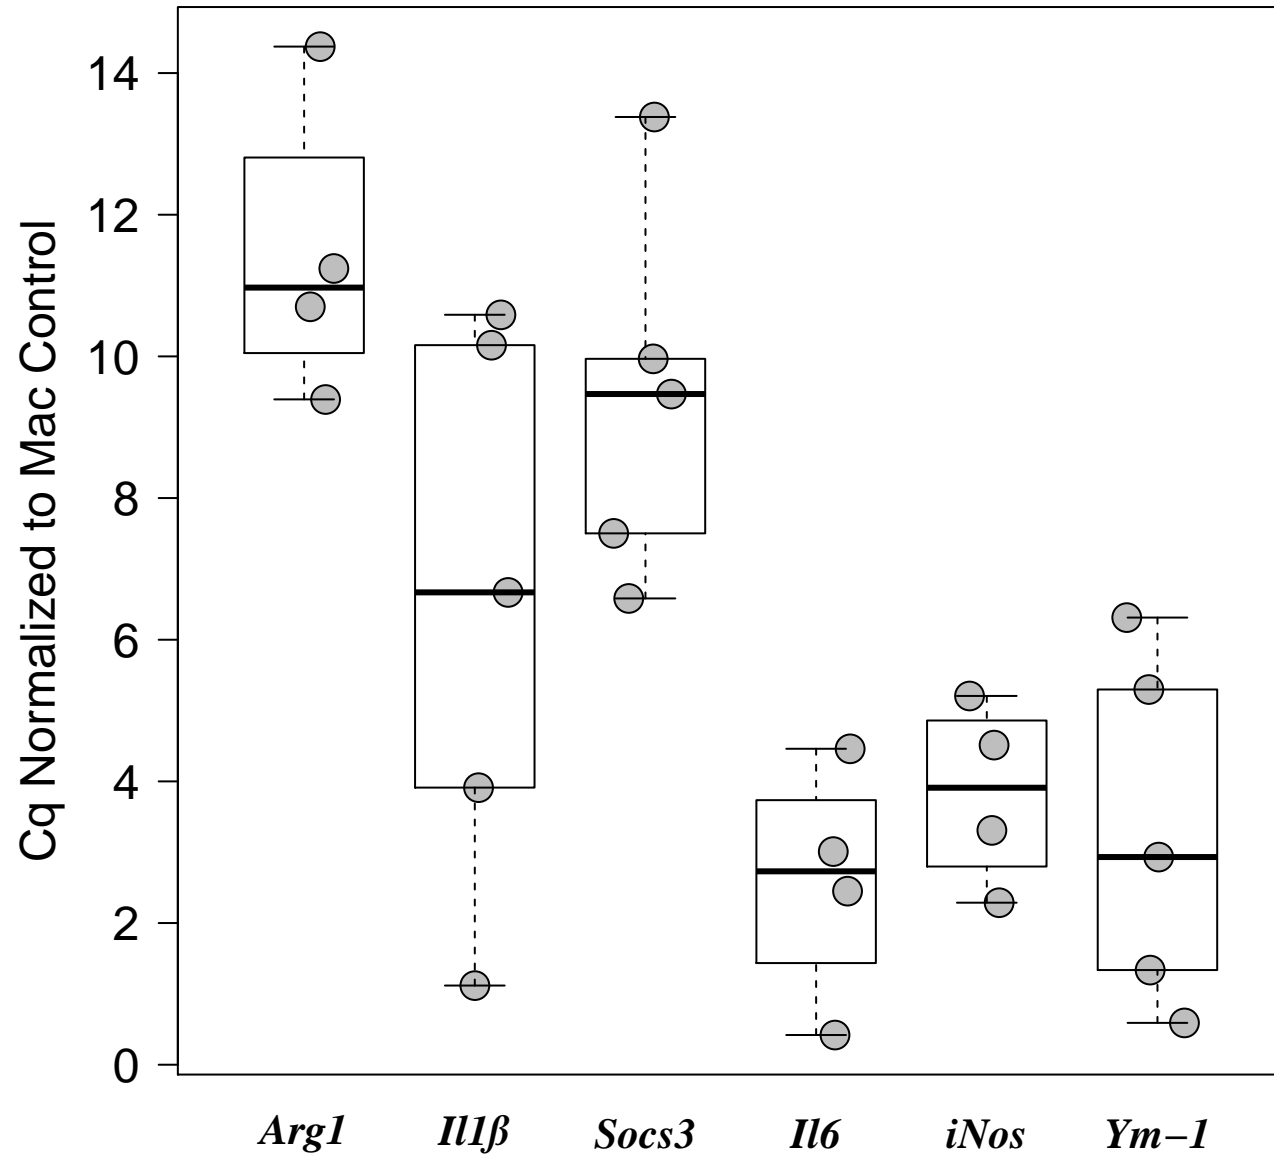

H1693 (Arg1 SD = 1.4)

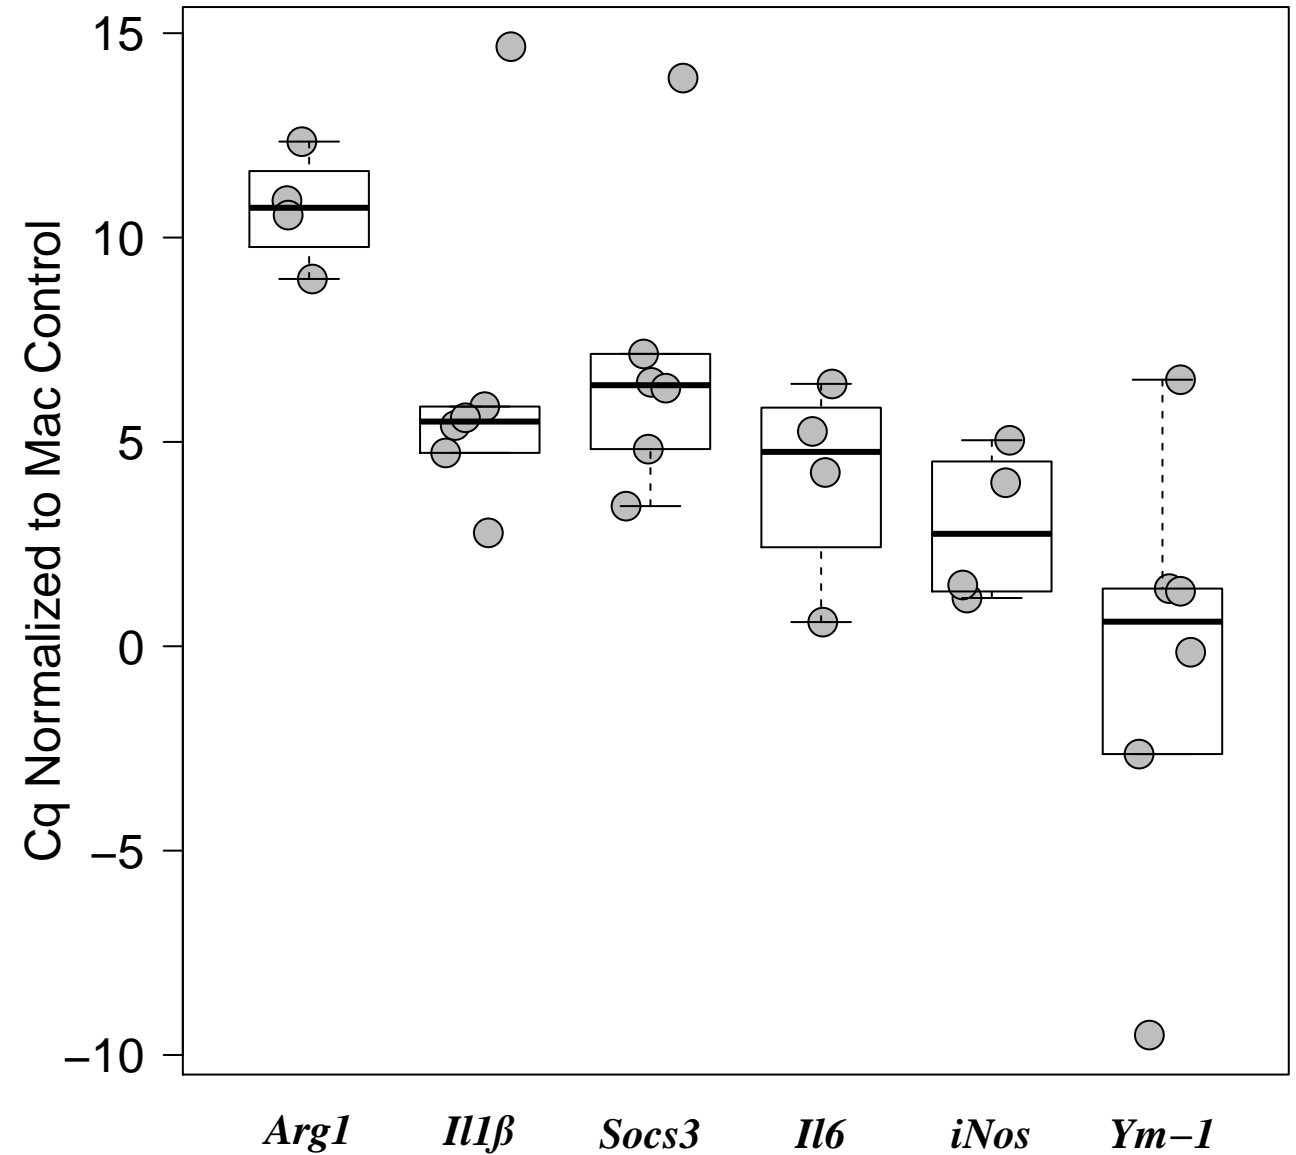

H1703 (Arg1 SD = 1.9)

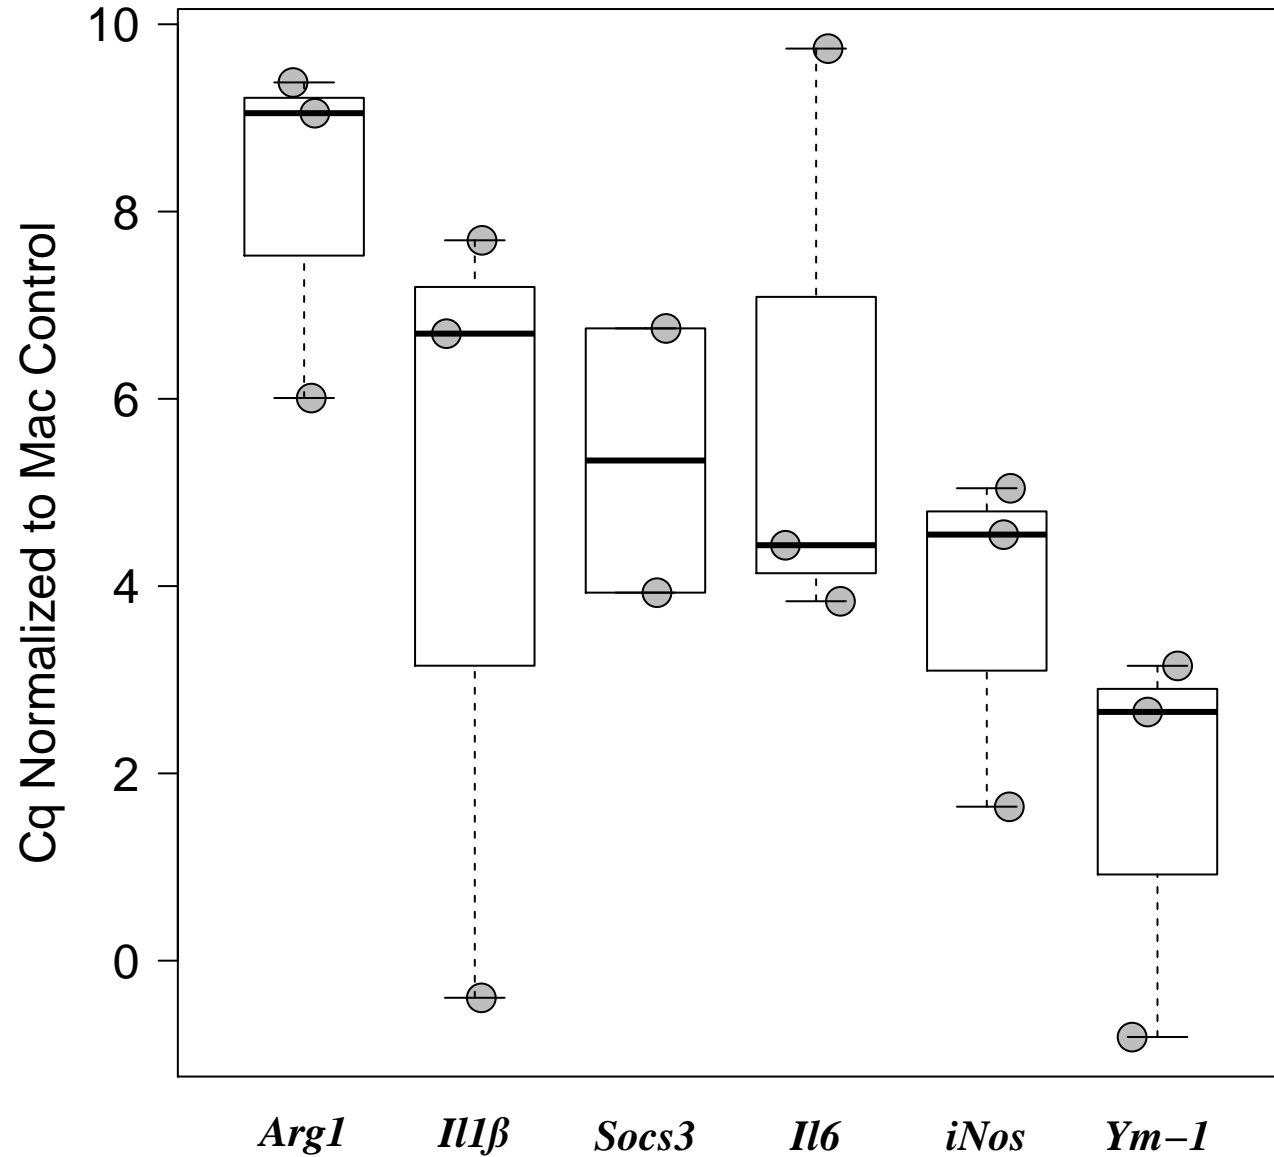

H1734 (Arg1 SD = 3.3)

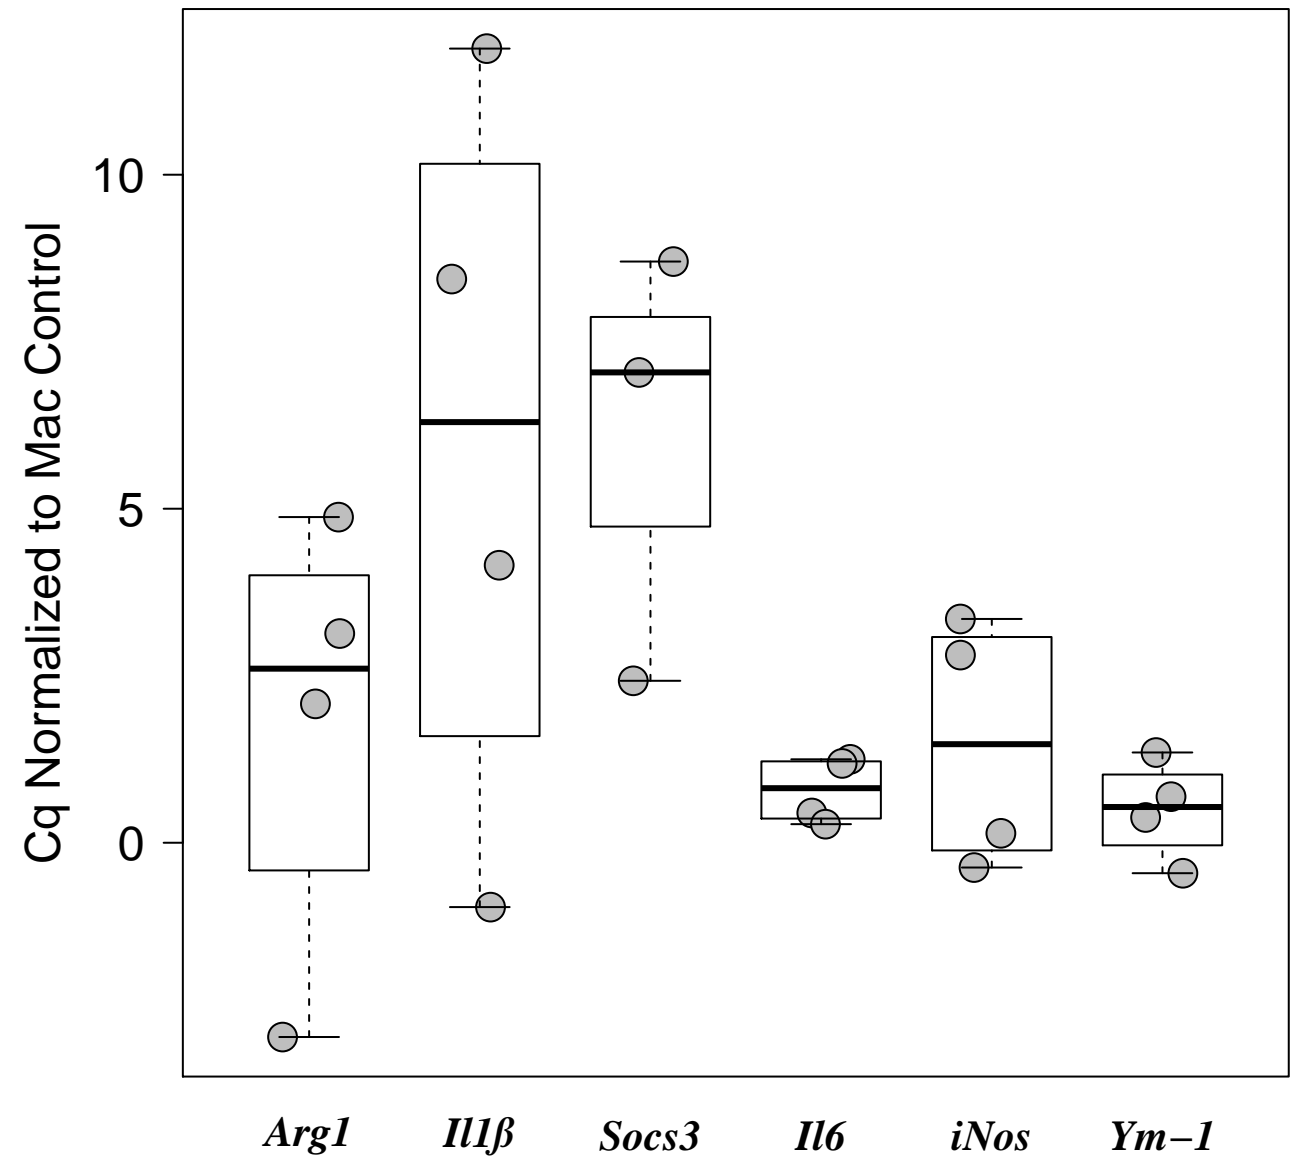

H1755 (Arg1 SD = 3.1)

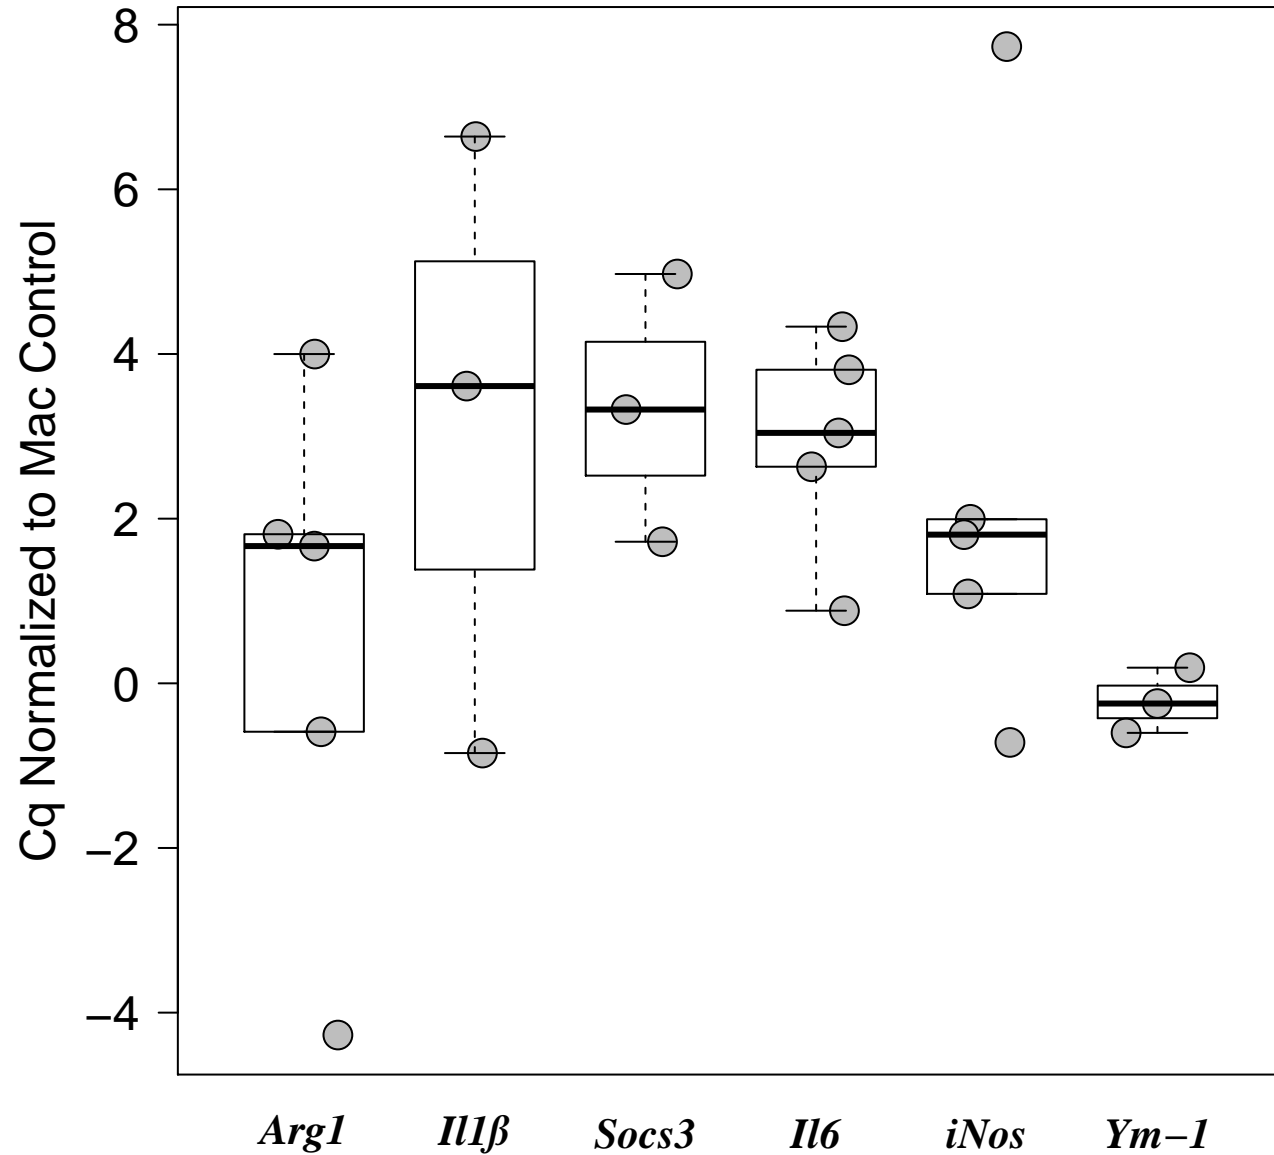

H1792 (Arg1 SD = 3)

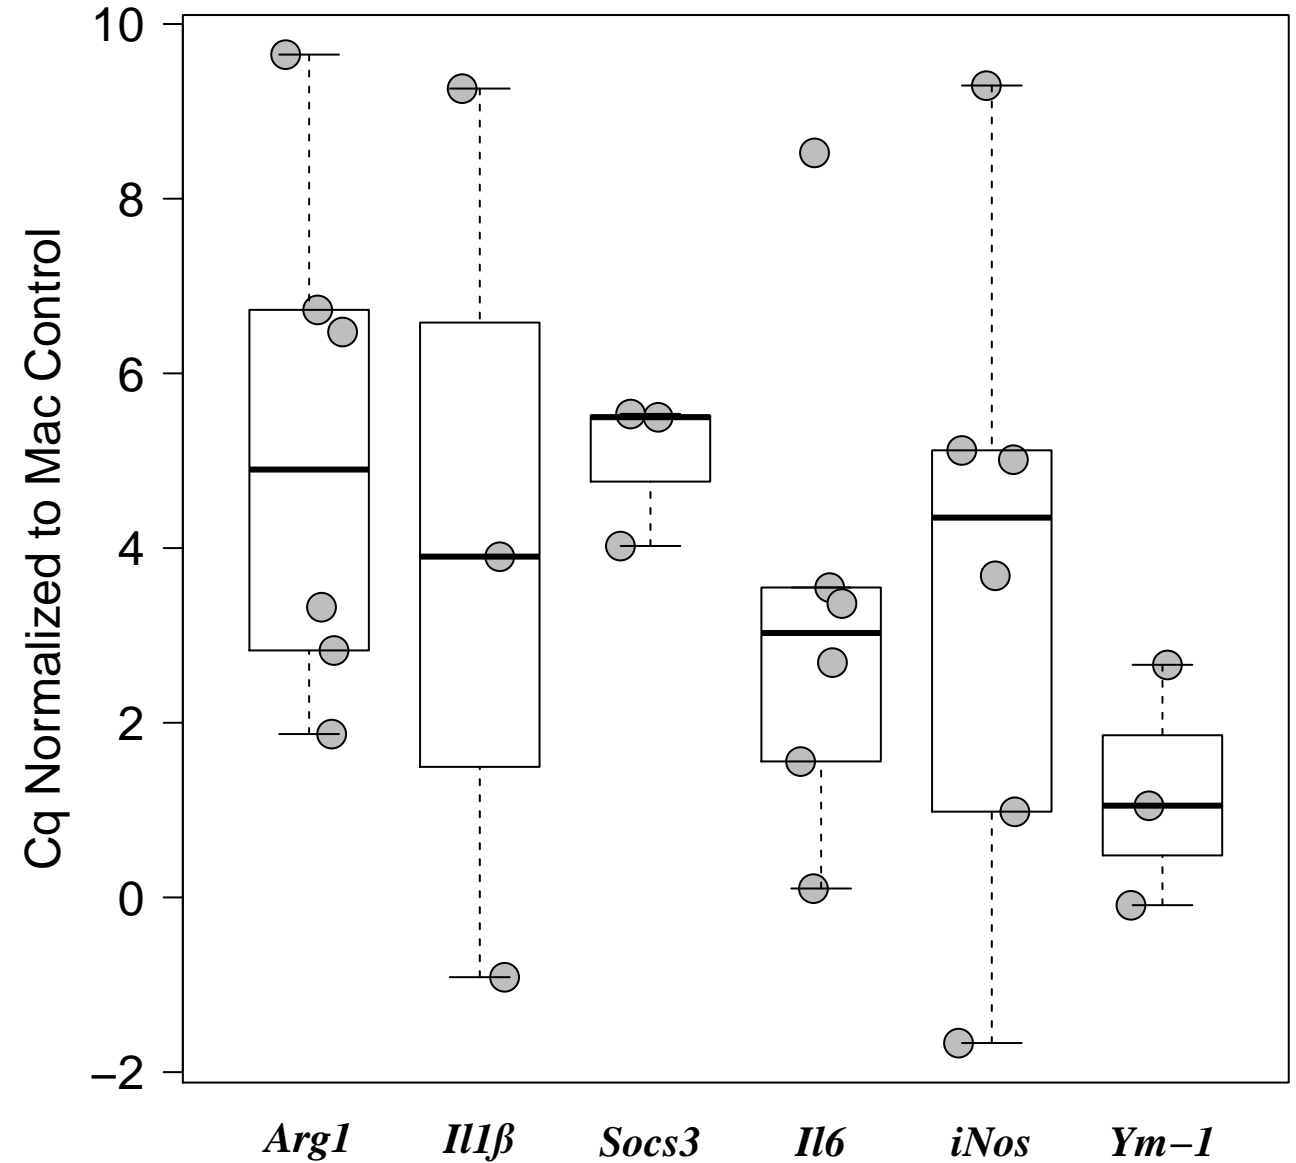

H1819 (Arg1 SD = 3.3)

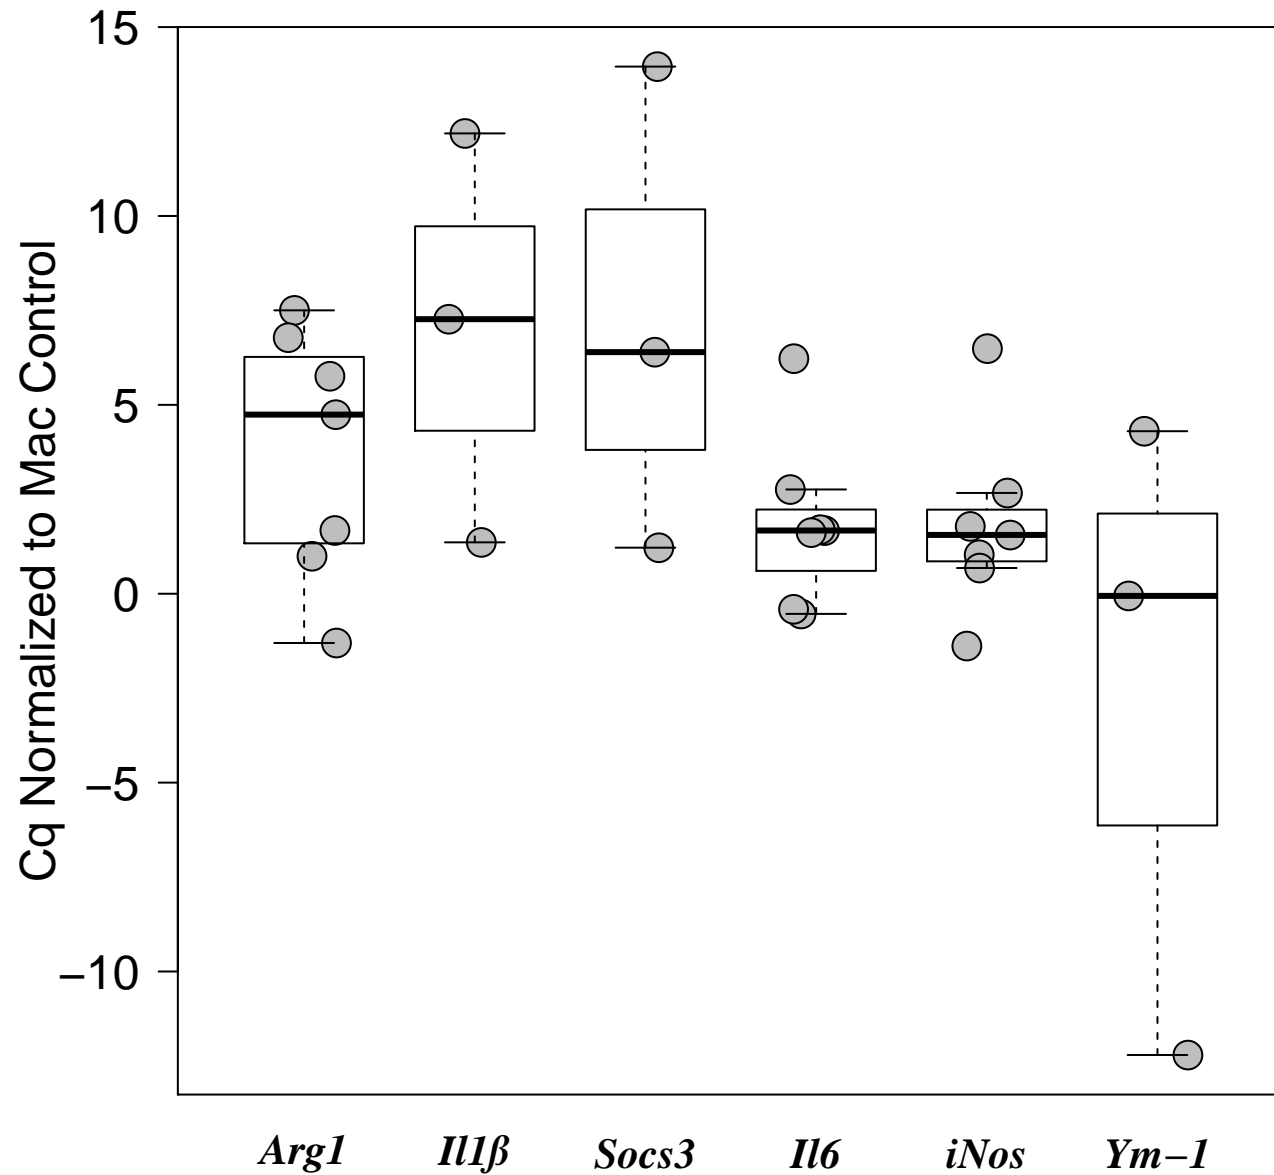

H1944 (Arg1 SD = 2.7)

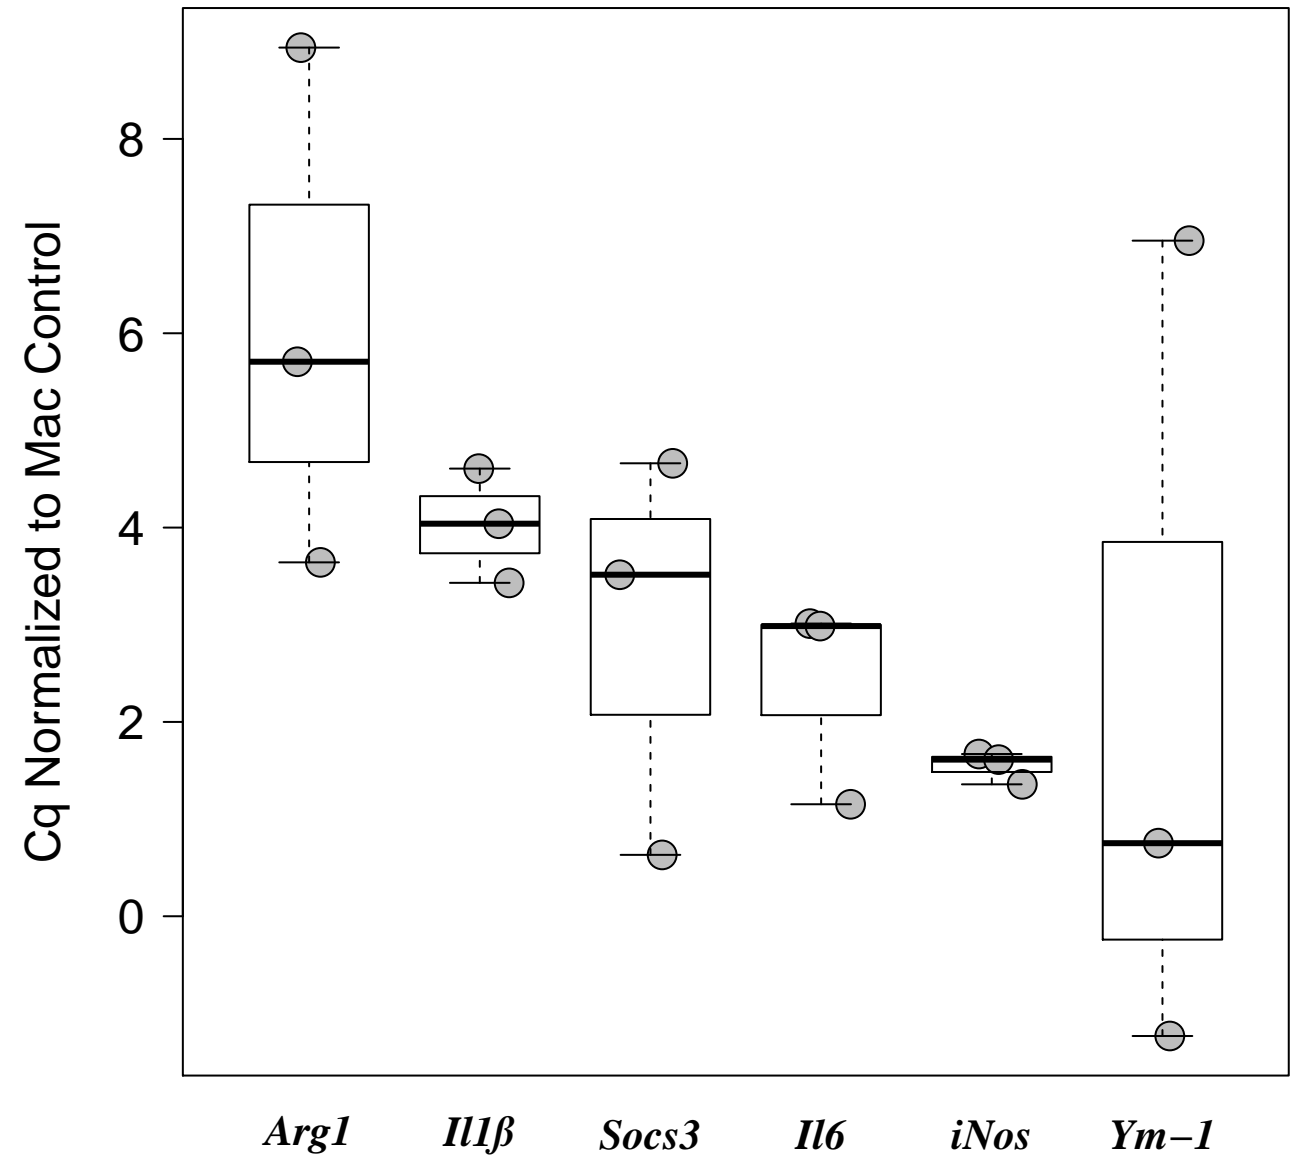

H1975 (Arg1 SD = 2.9)

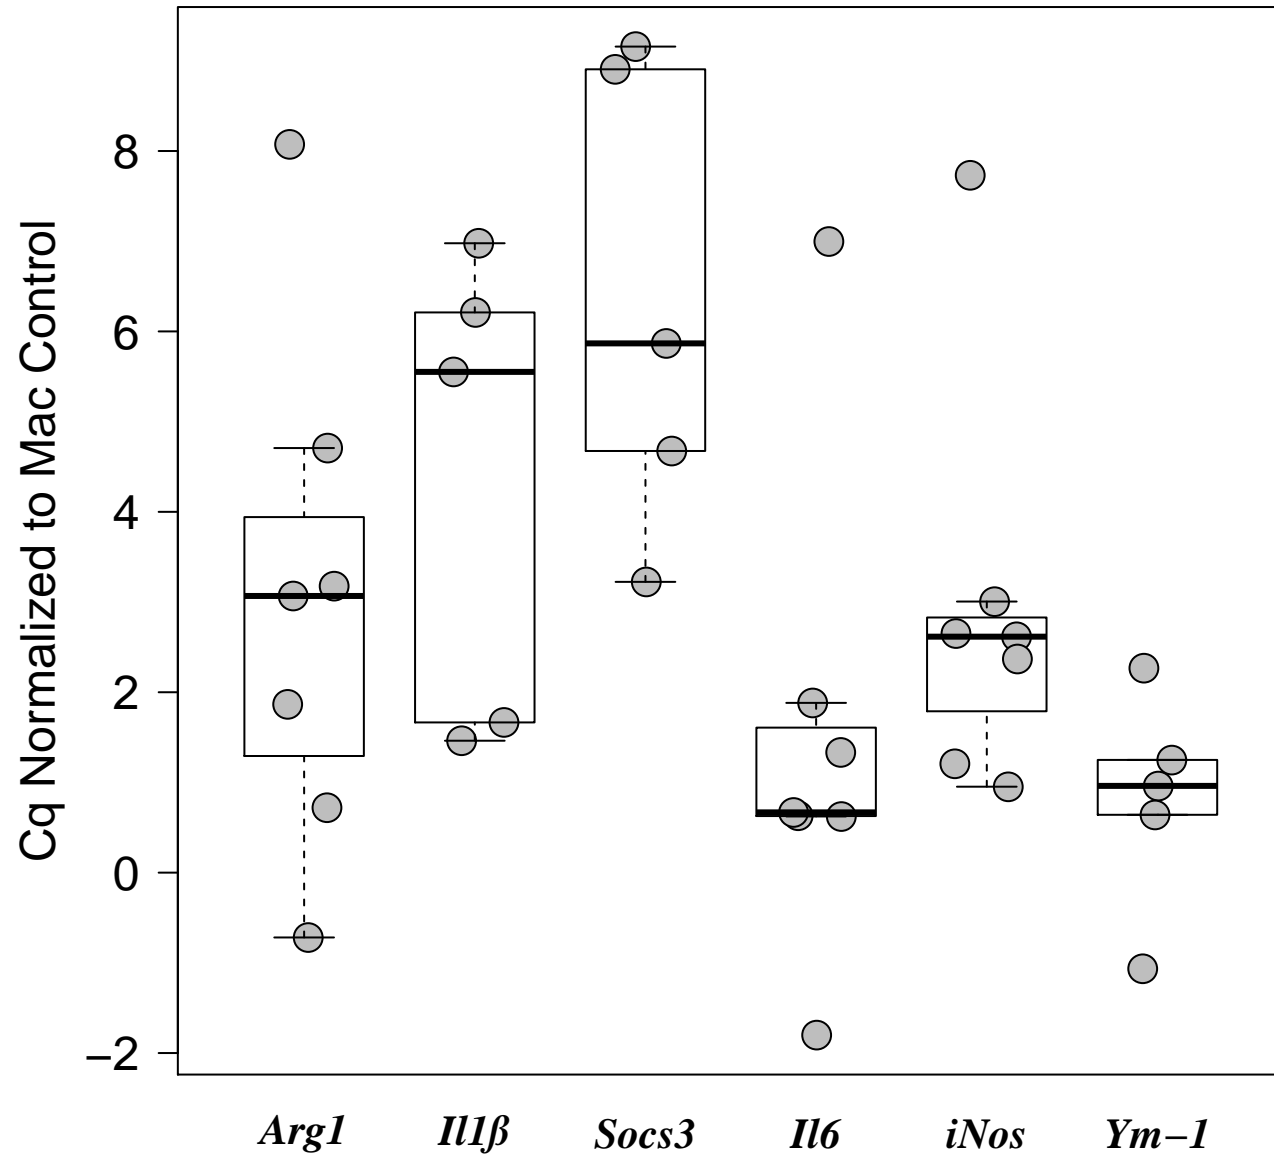

H1993 (Arg1 SD = 2.4)

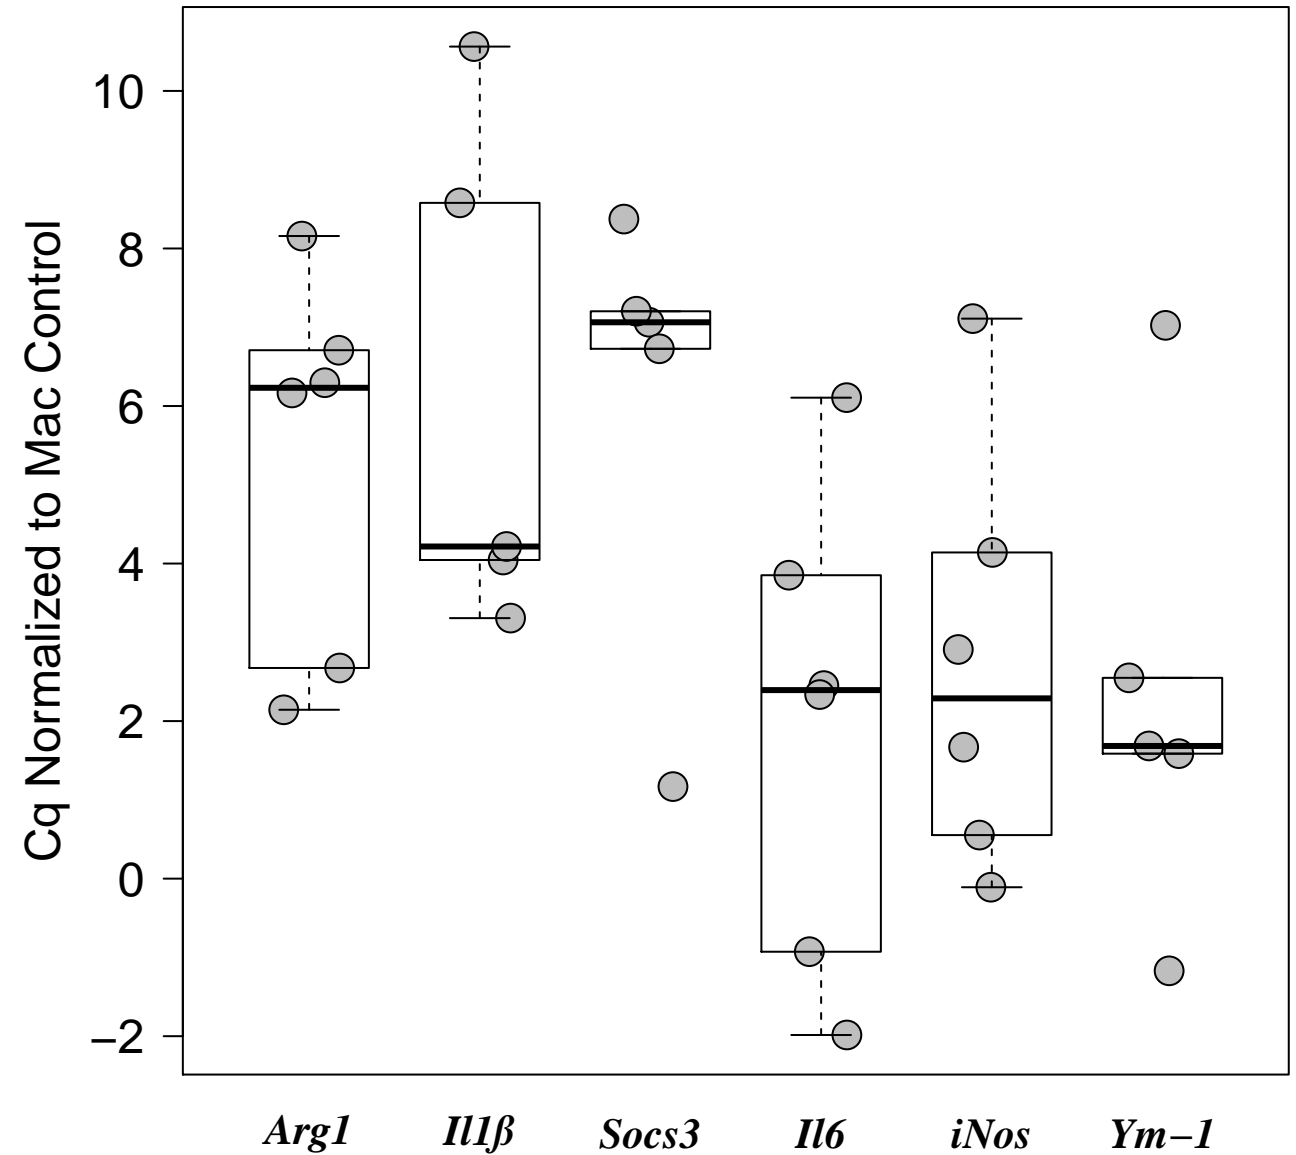

H2009 (Arg1 SD = 1.7)

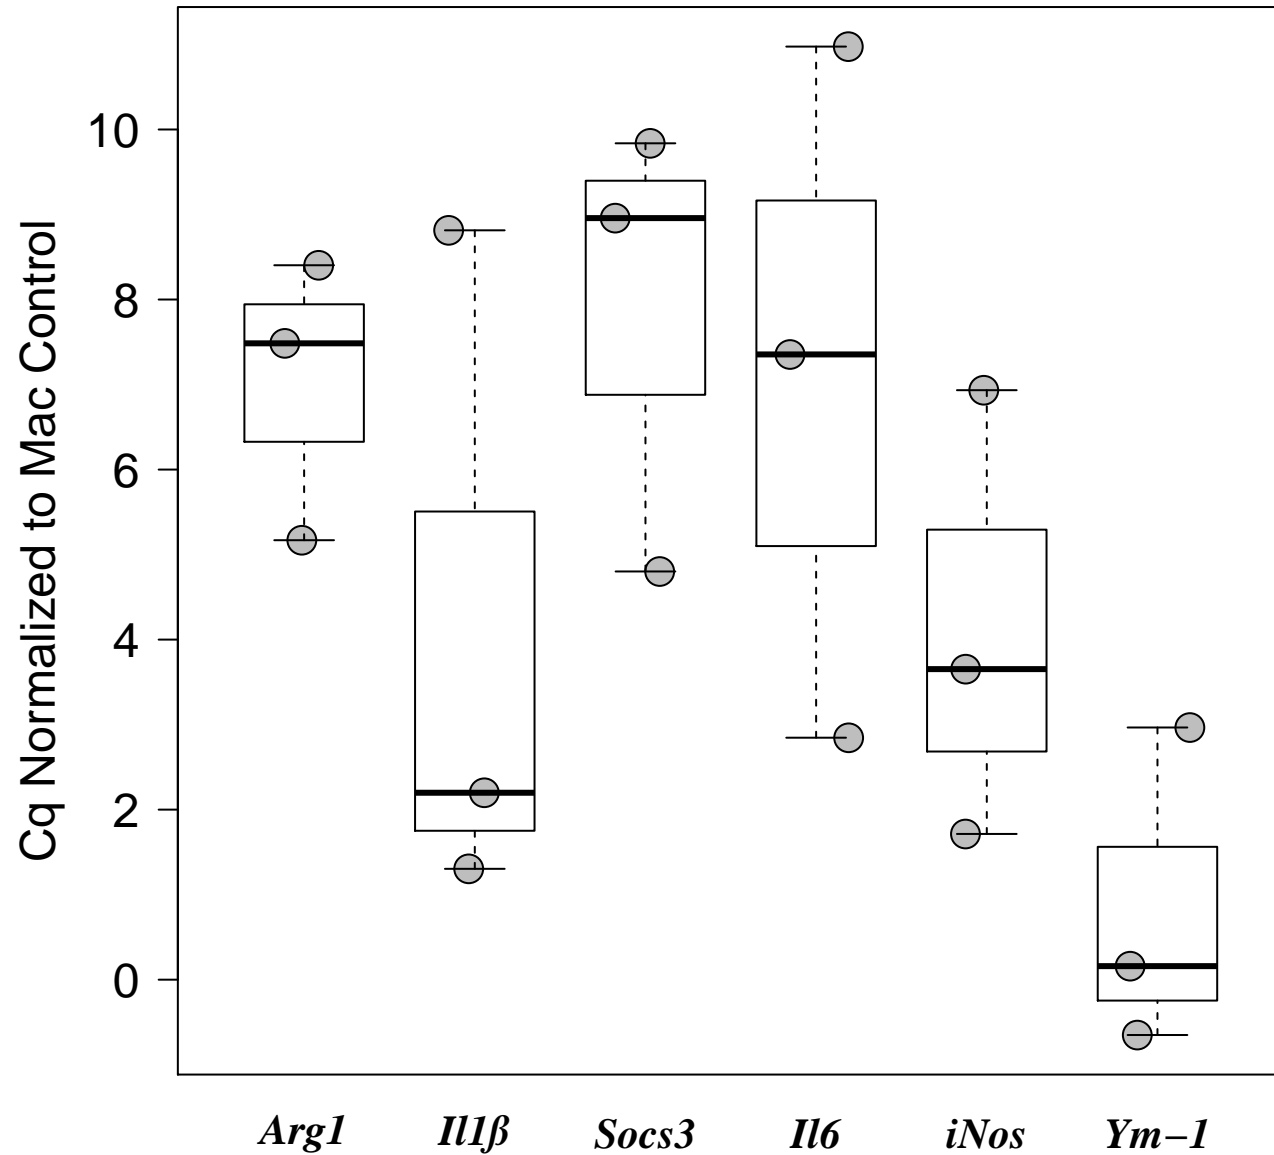

H2030 (Arg1 SD = 2.5)

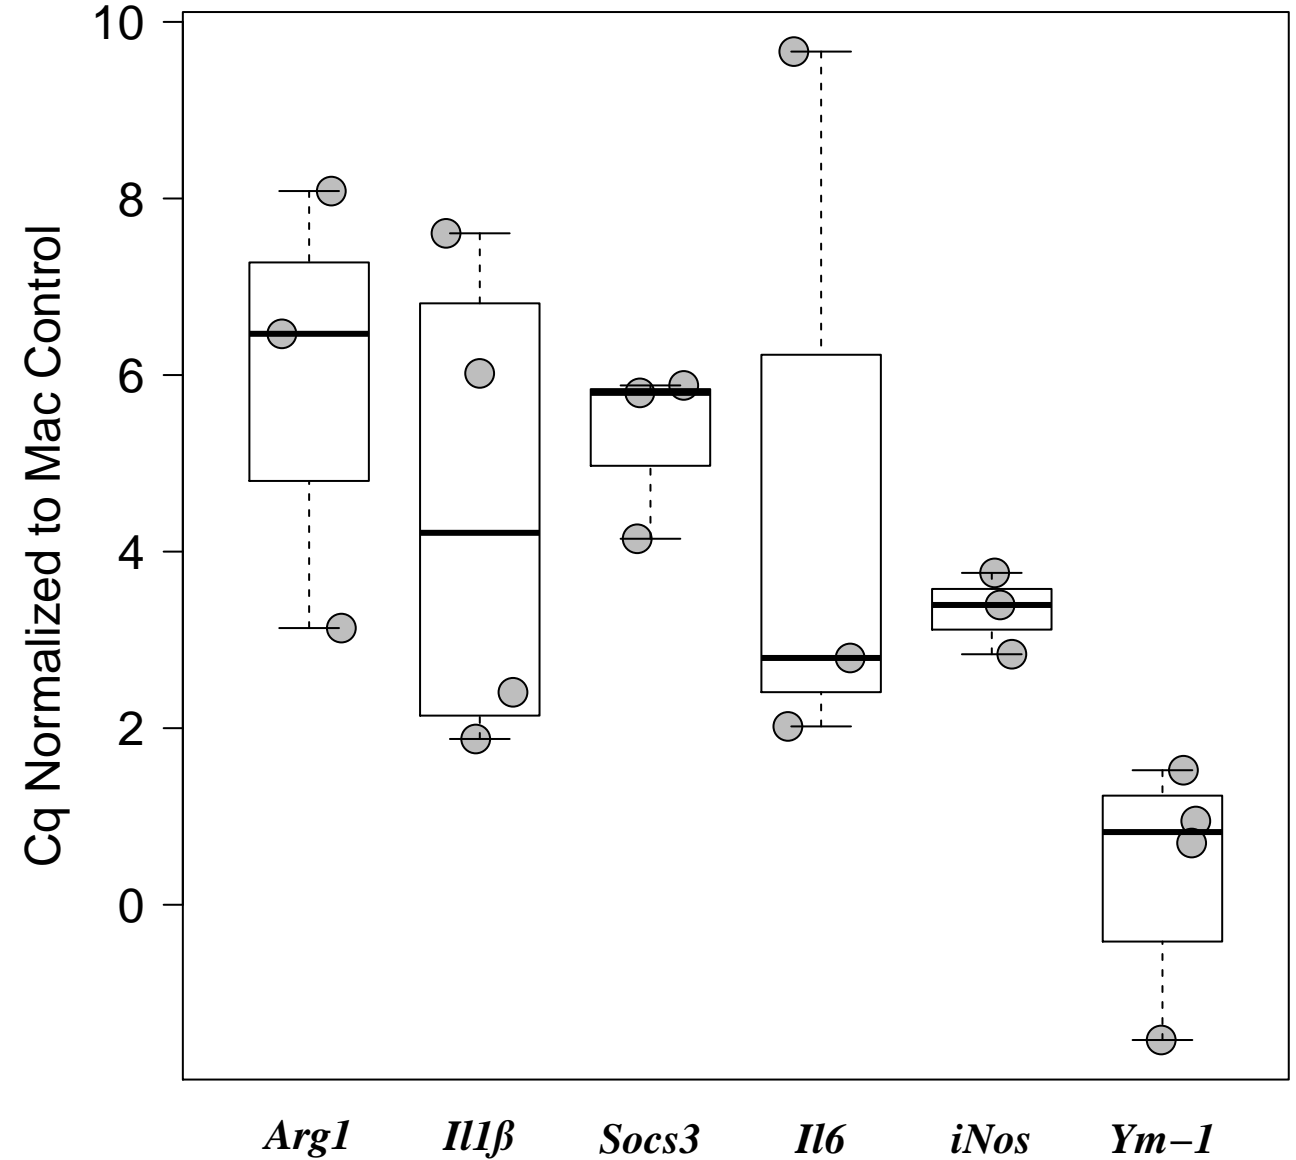

H2073 (Arg1 SD = 3.2)

H2085 (Arg1 SD = 1)

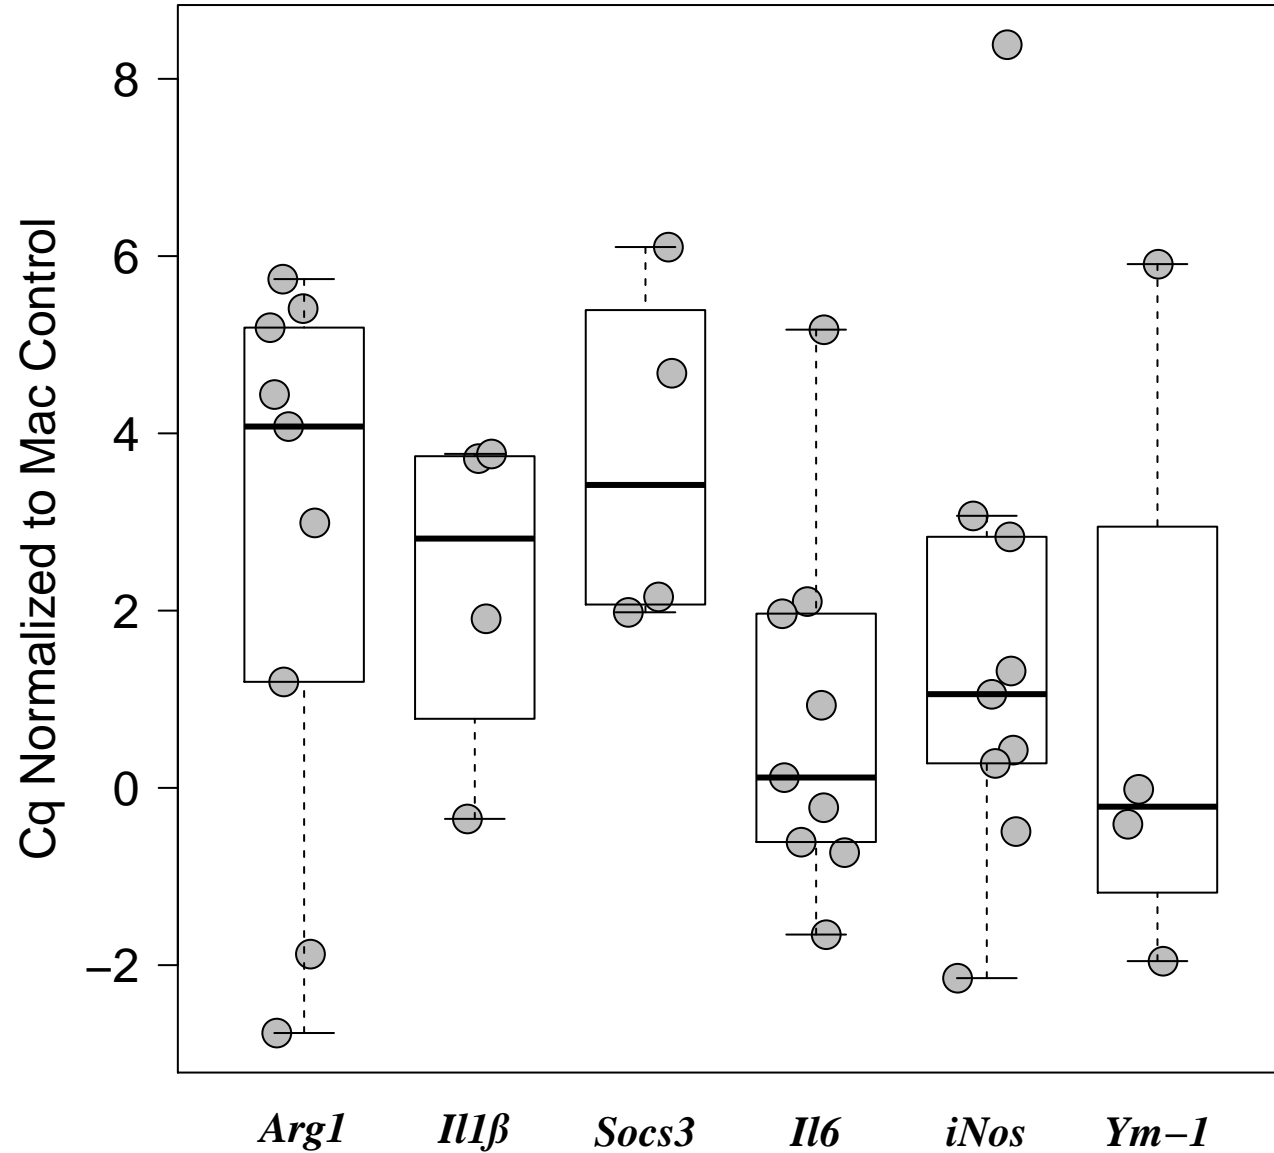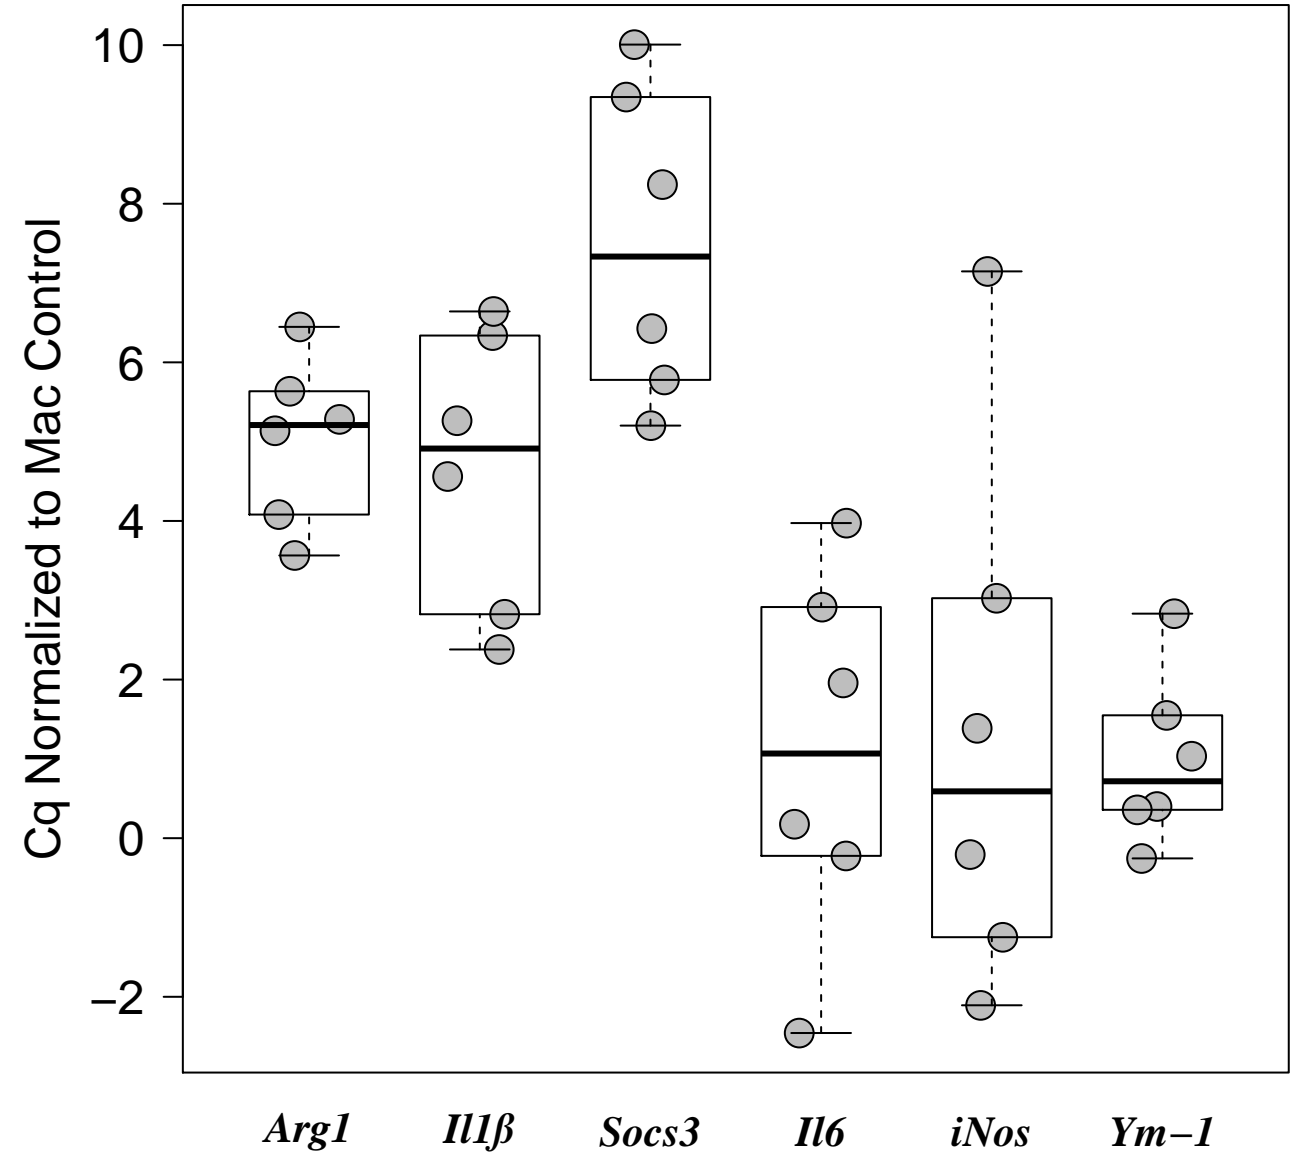

H2086 (Arg1 SD = 4.9)

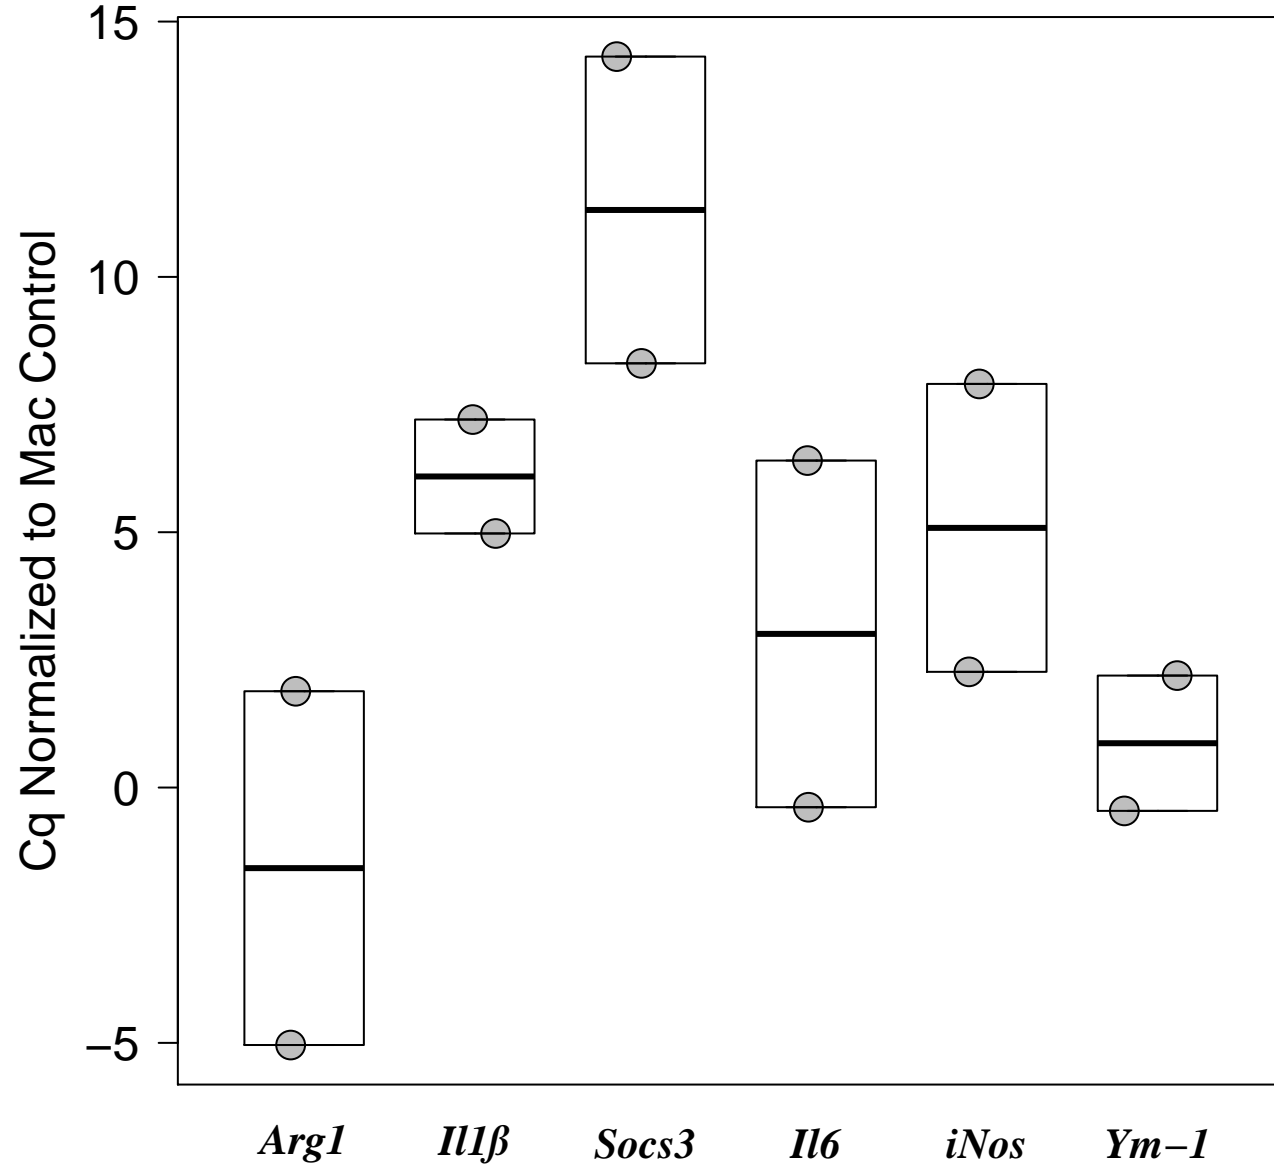

H2087 (Arg1 SD = 3.6)

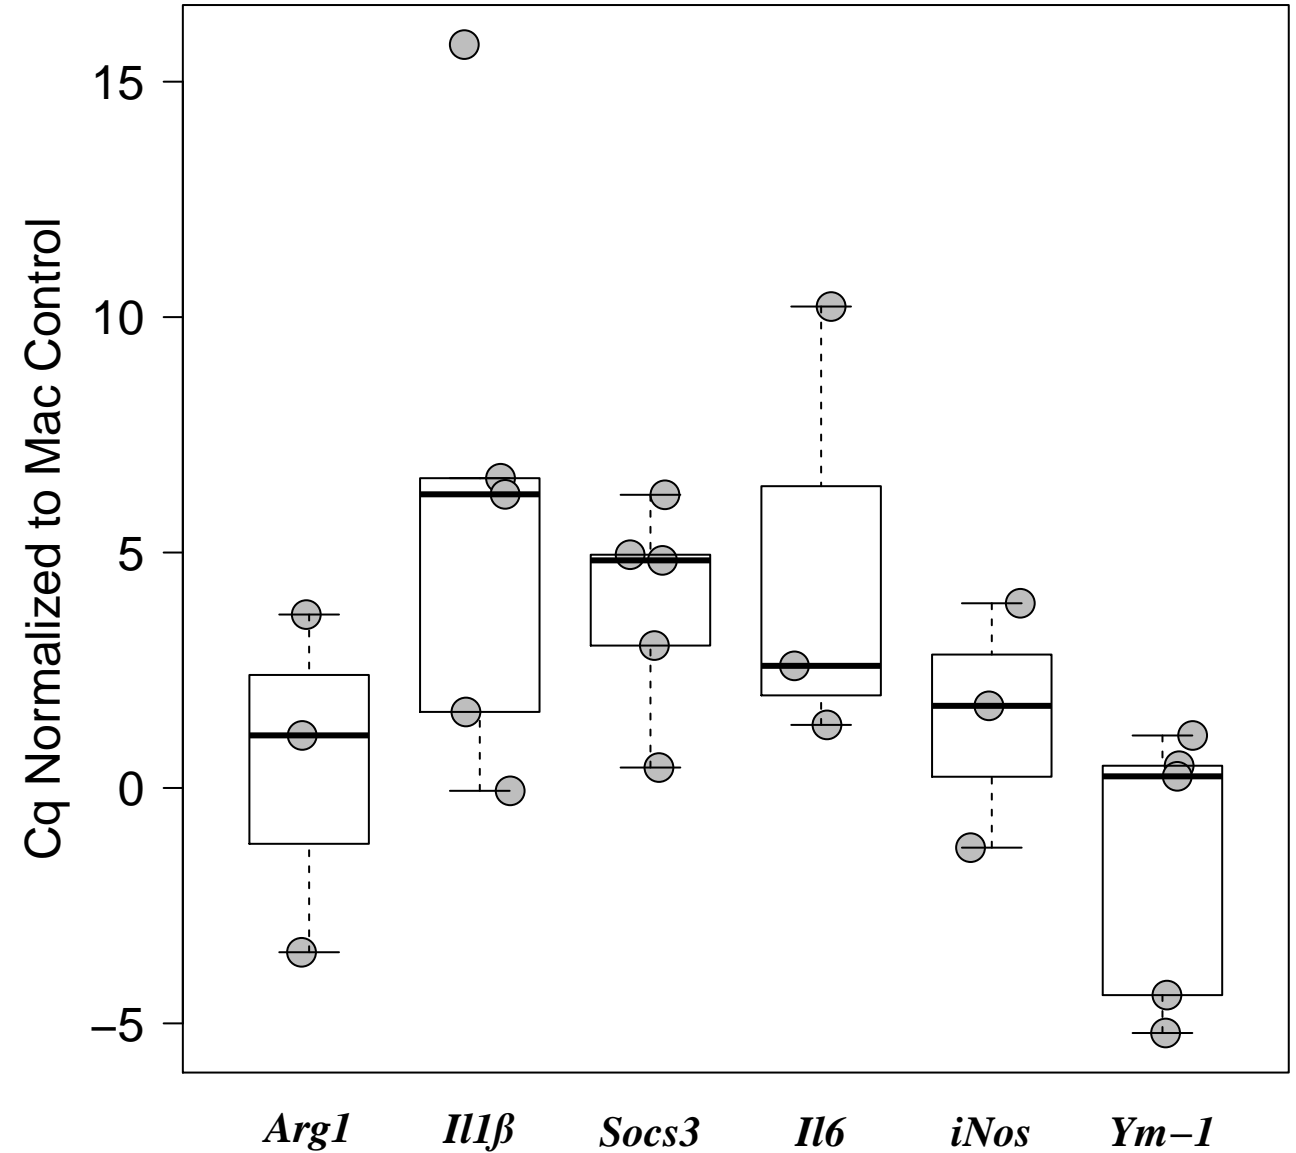



H2122 (Arg1 SD = 2.6)

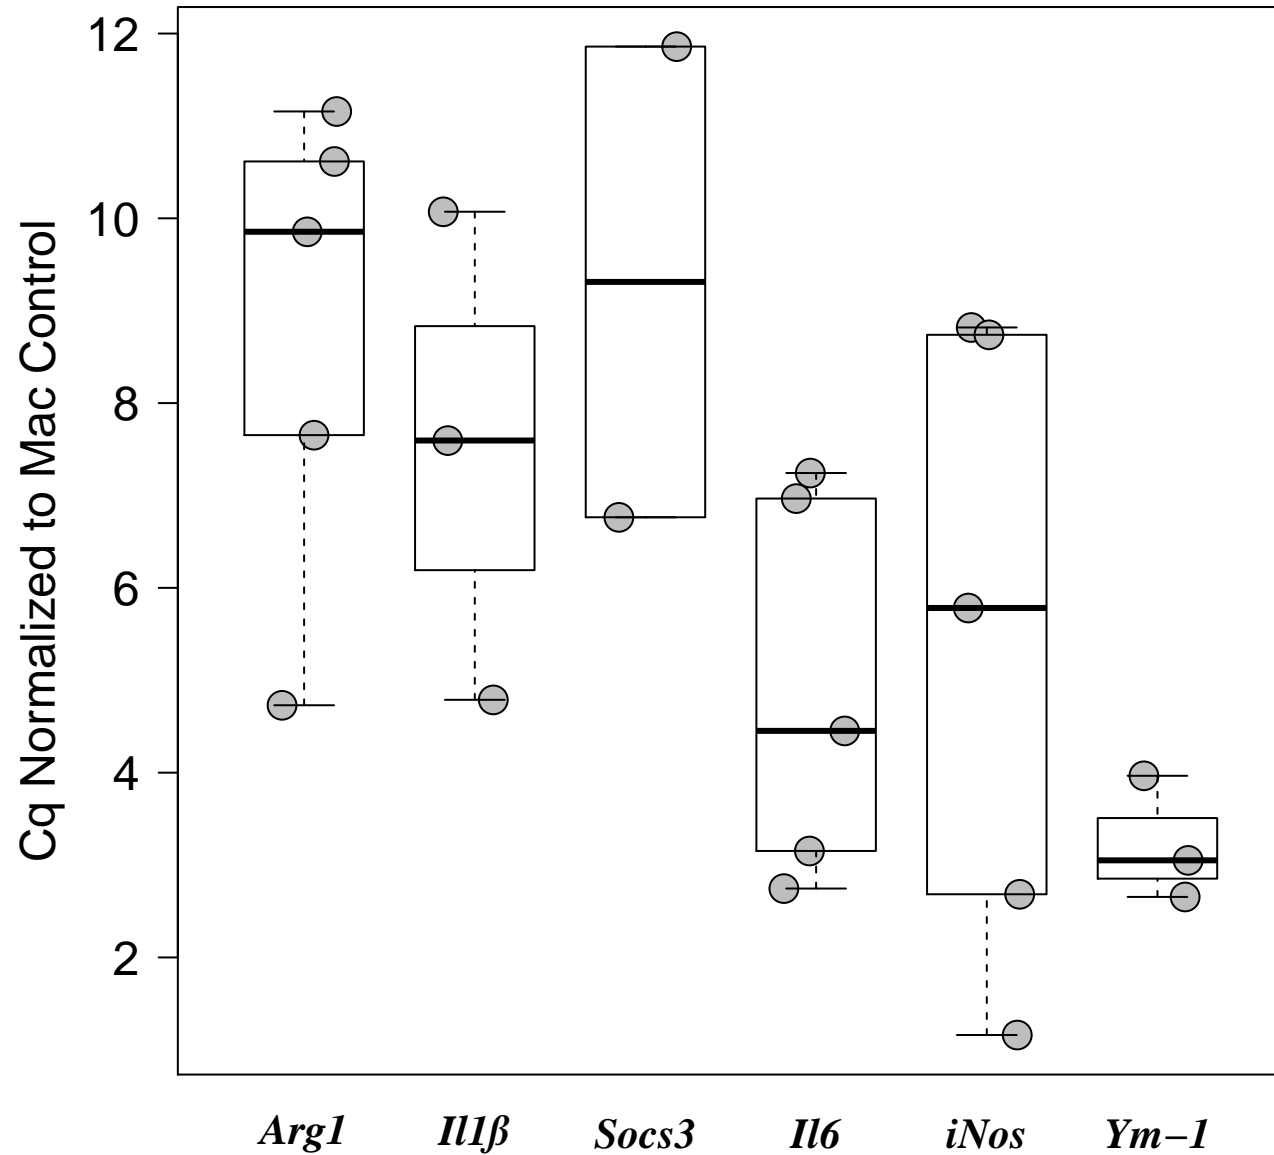

H2172 (Arg1 SD = 4.8)

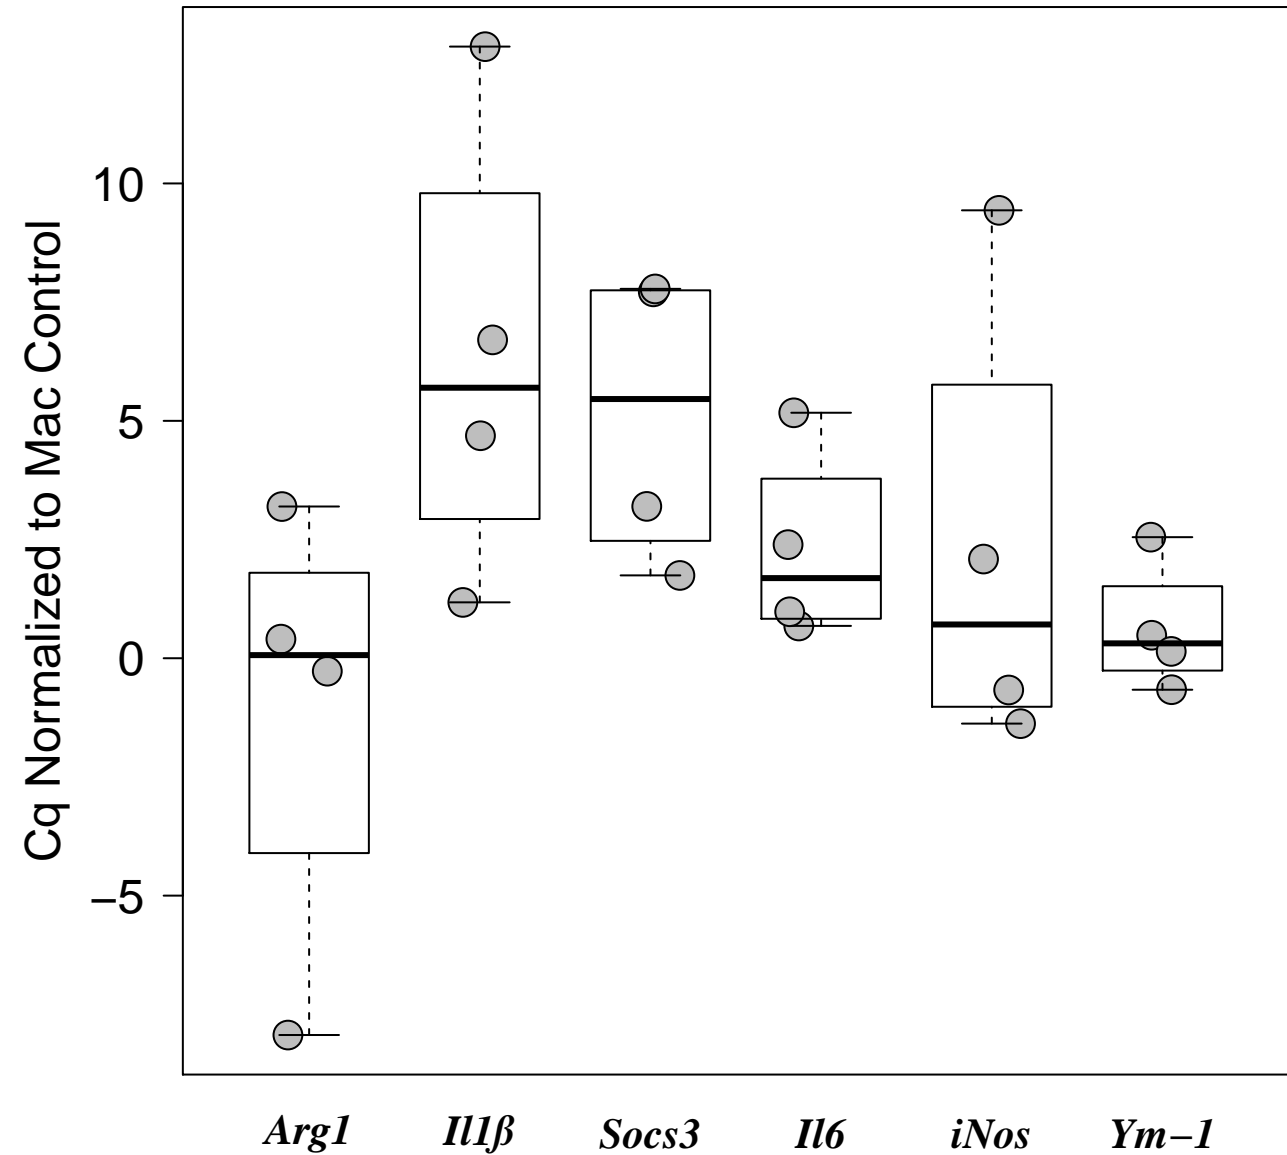

H2258 (Arg1 SD = 0.3)

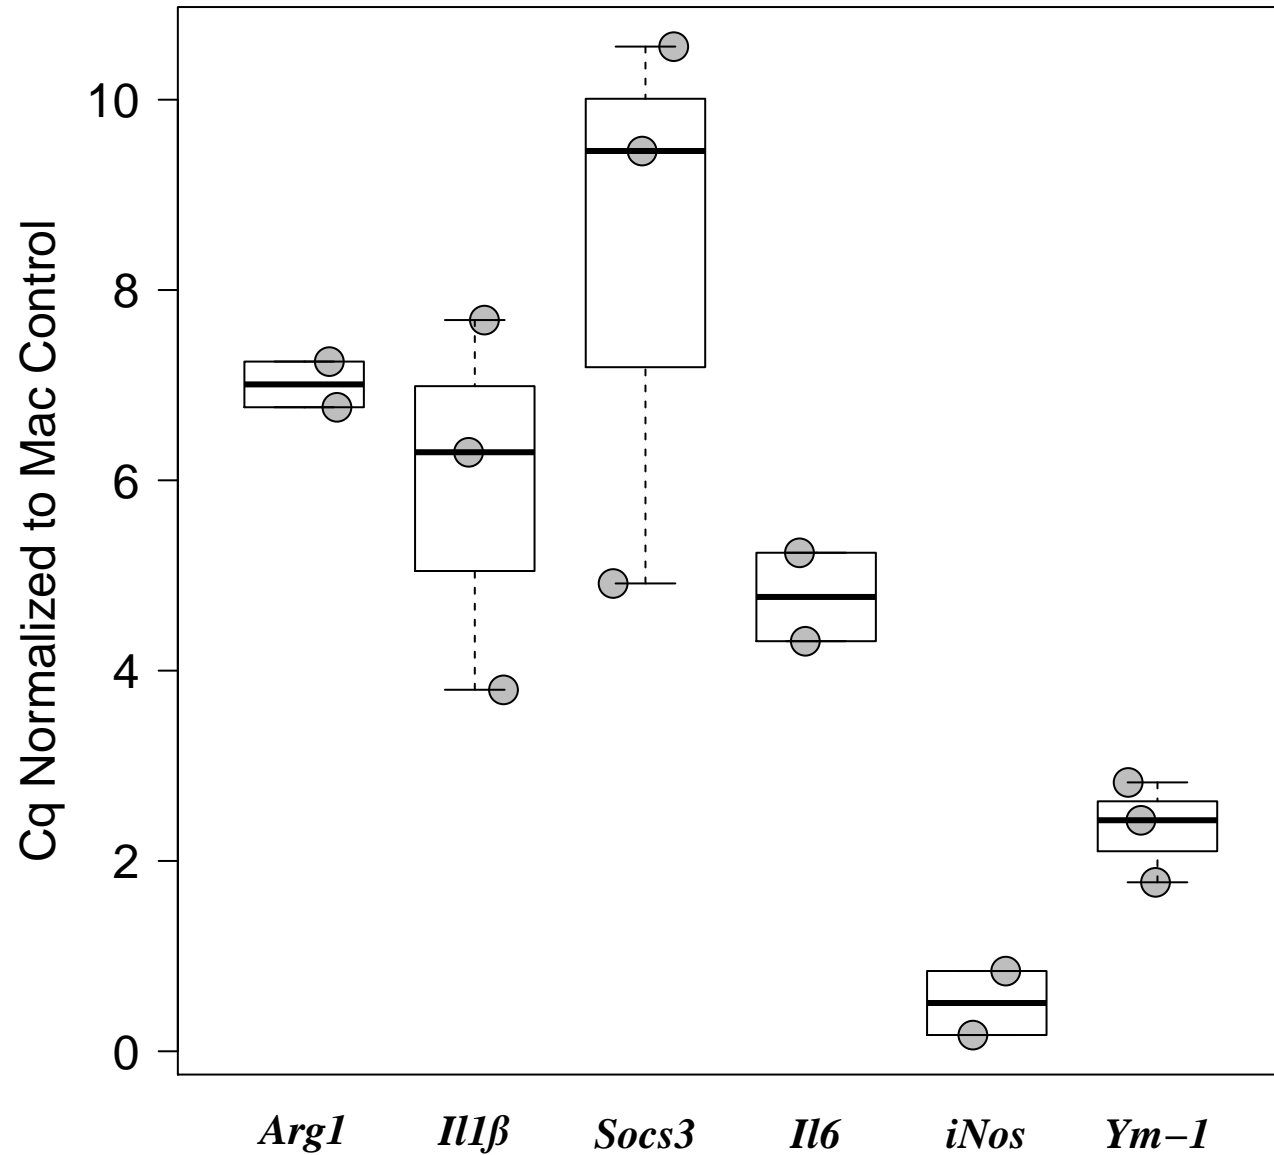

H226 (Arg1 SD = 2.5)

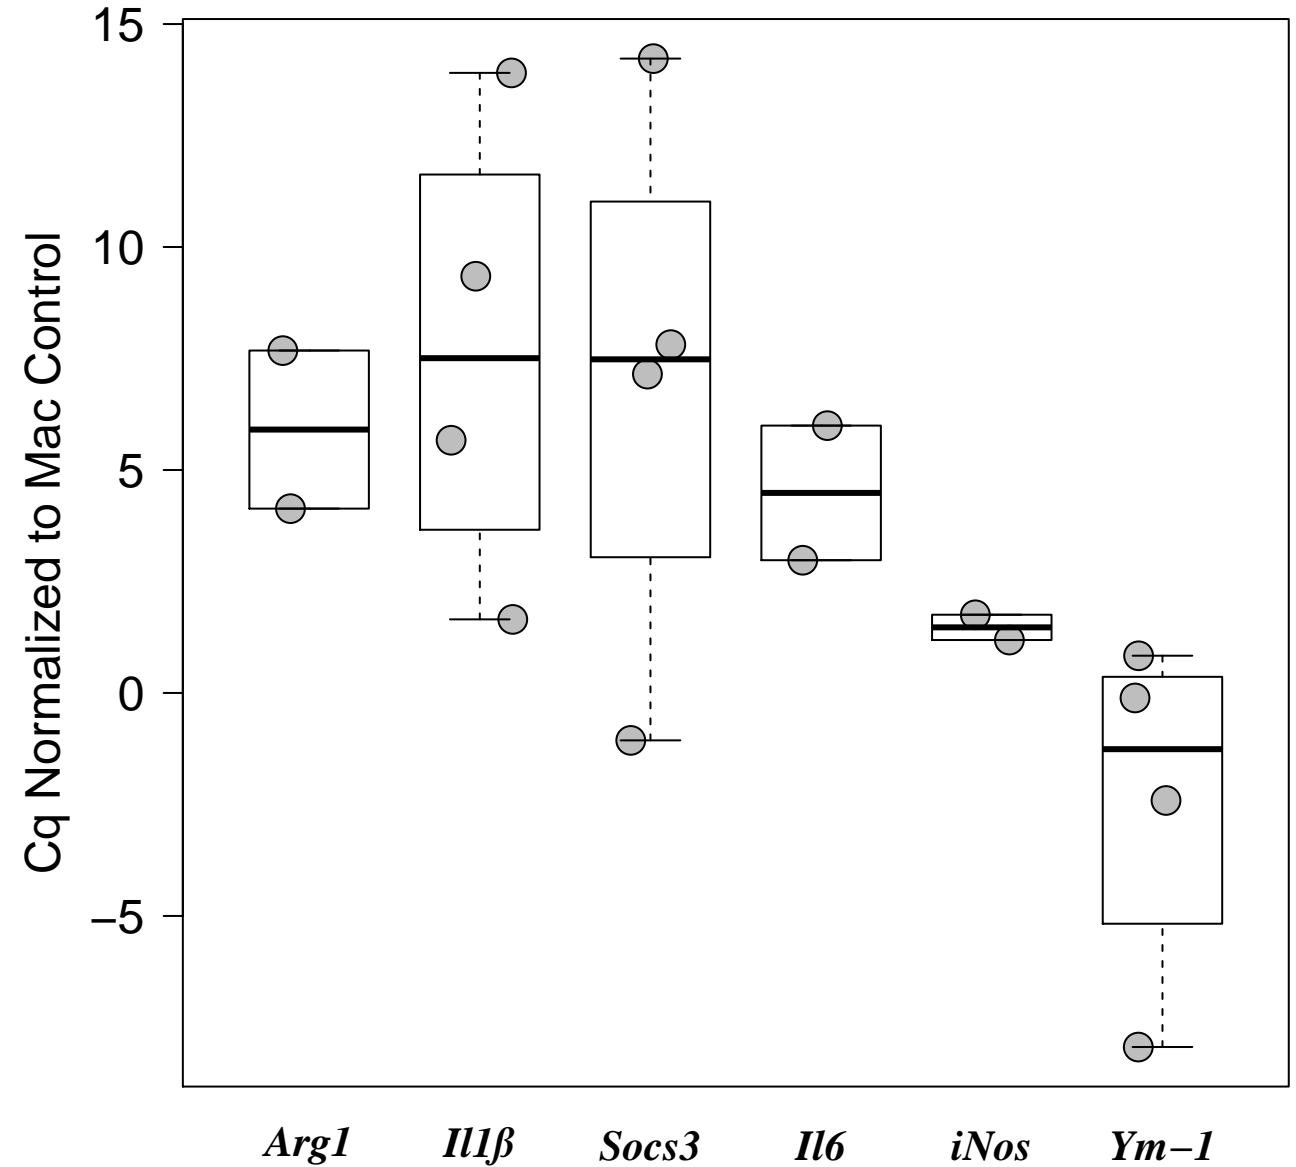

H2291 (Arg1 SD = 0.2)

H23 (Arg1 SD = 1.9)

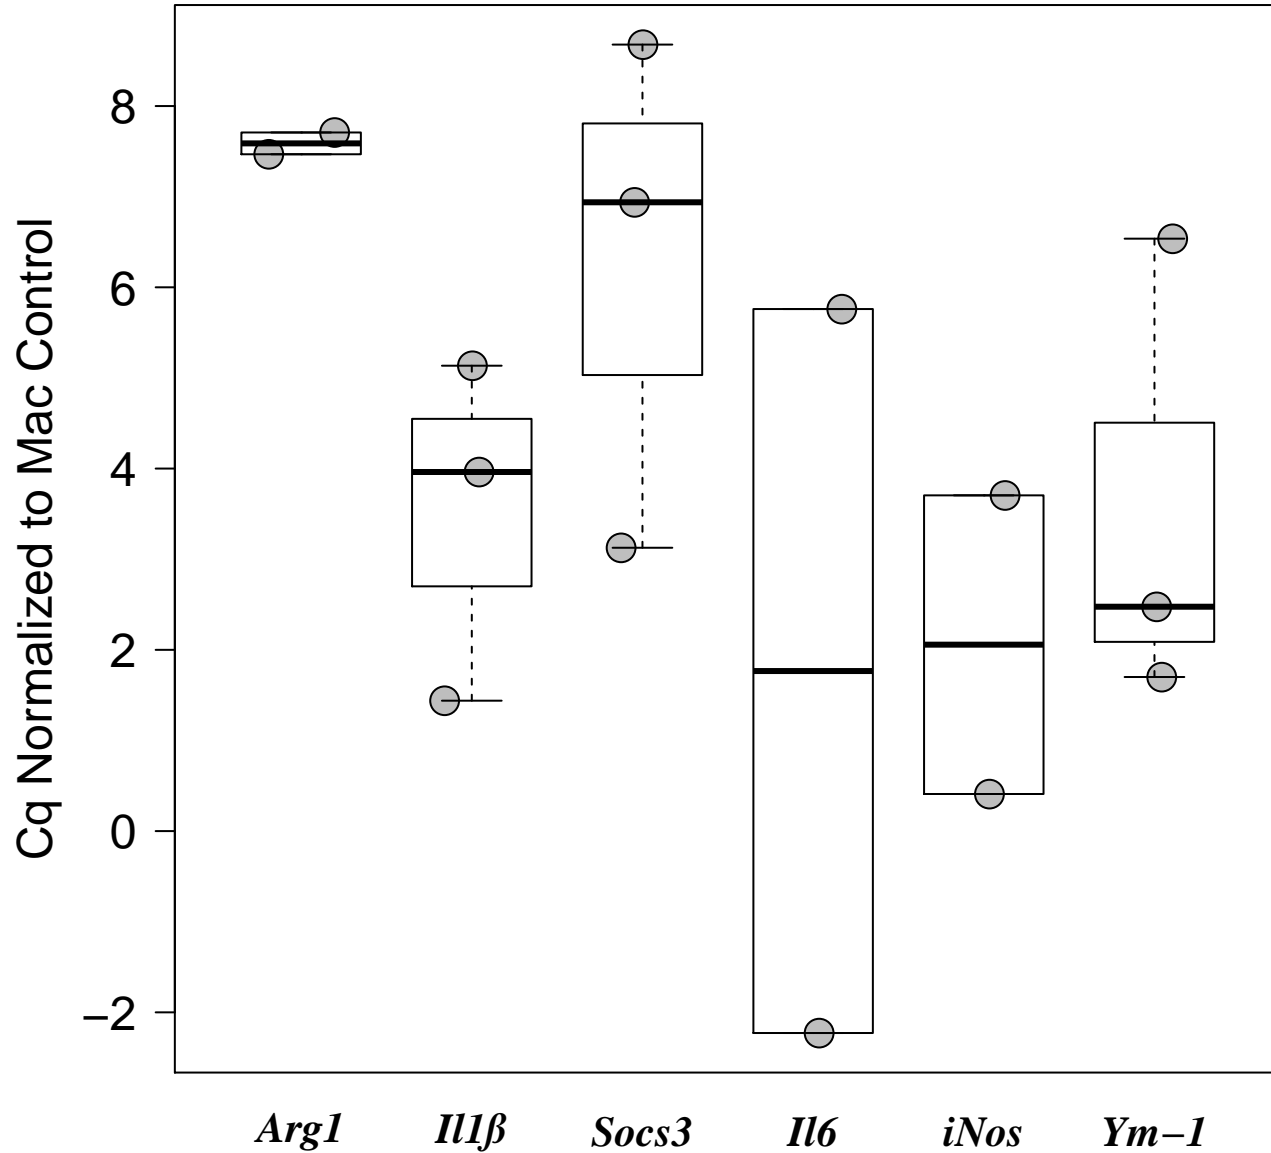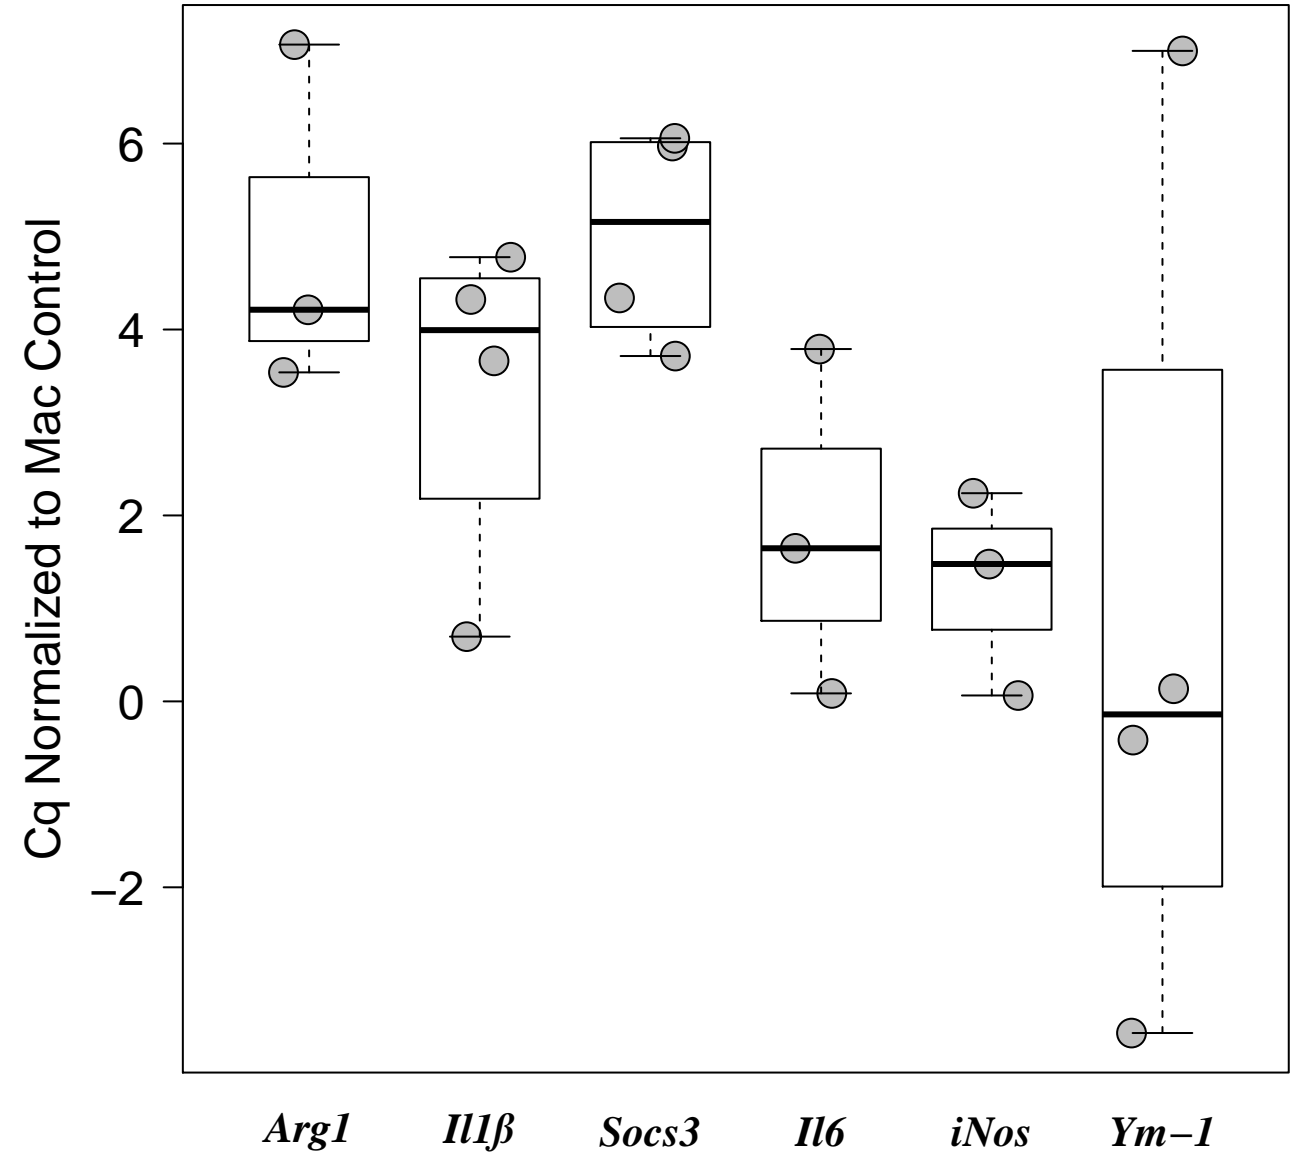

H2347 (Arg1 SD = 3)

H2887 (Arg1 SD = 4.6)

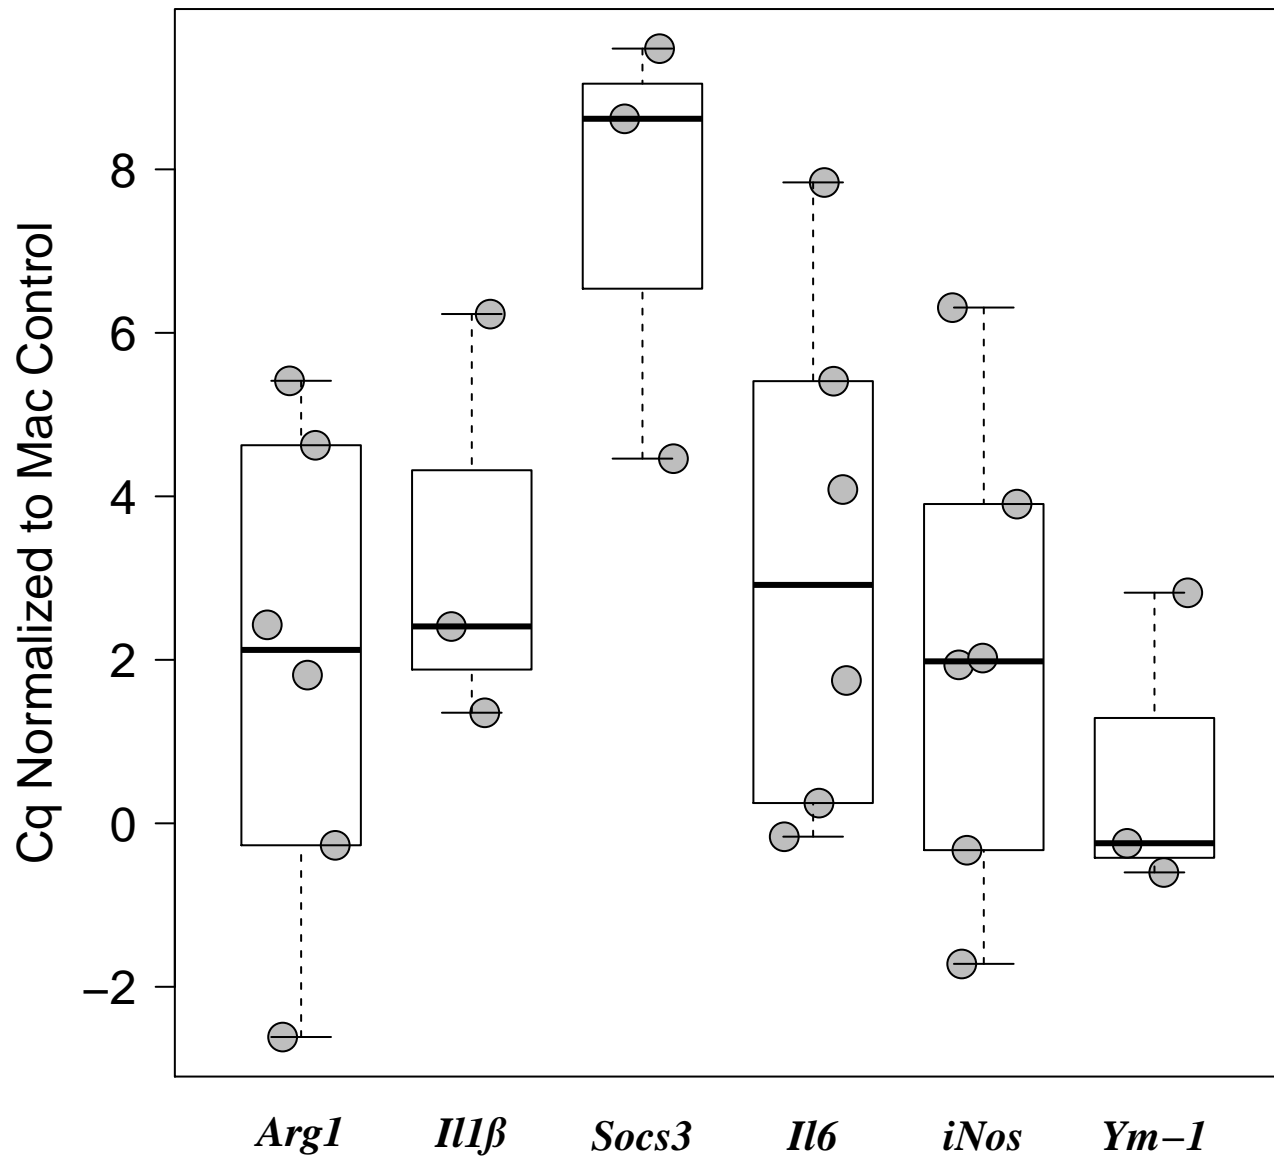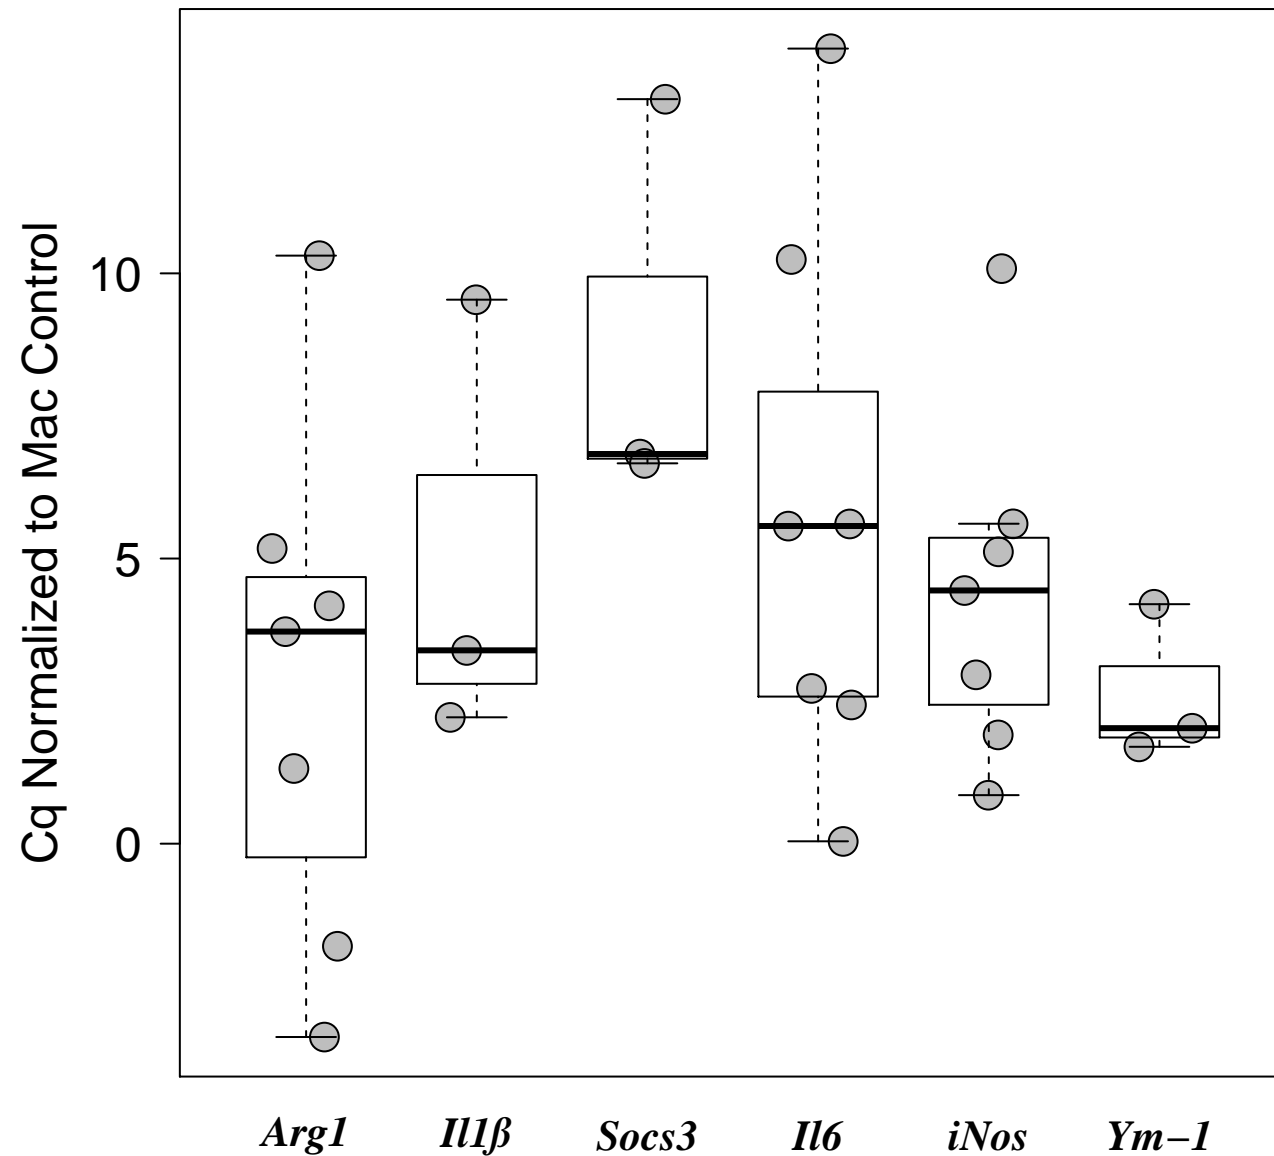

H292 (Arg1 SD = 2.5)

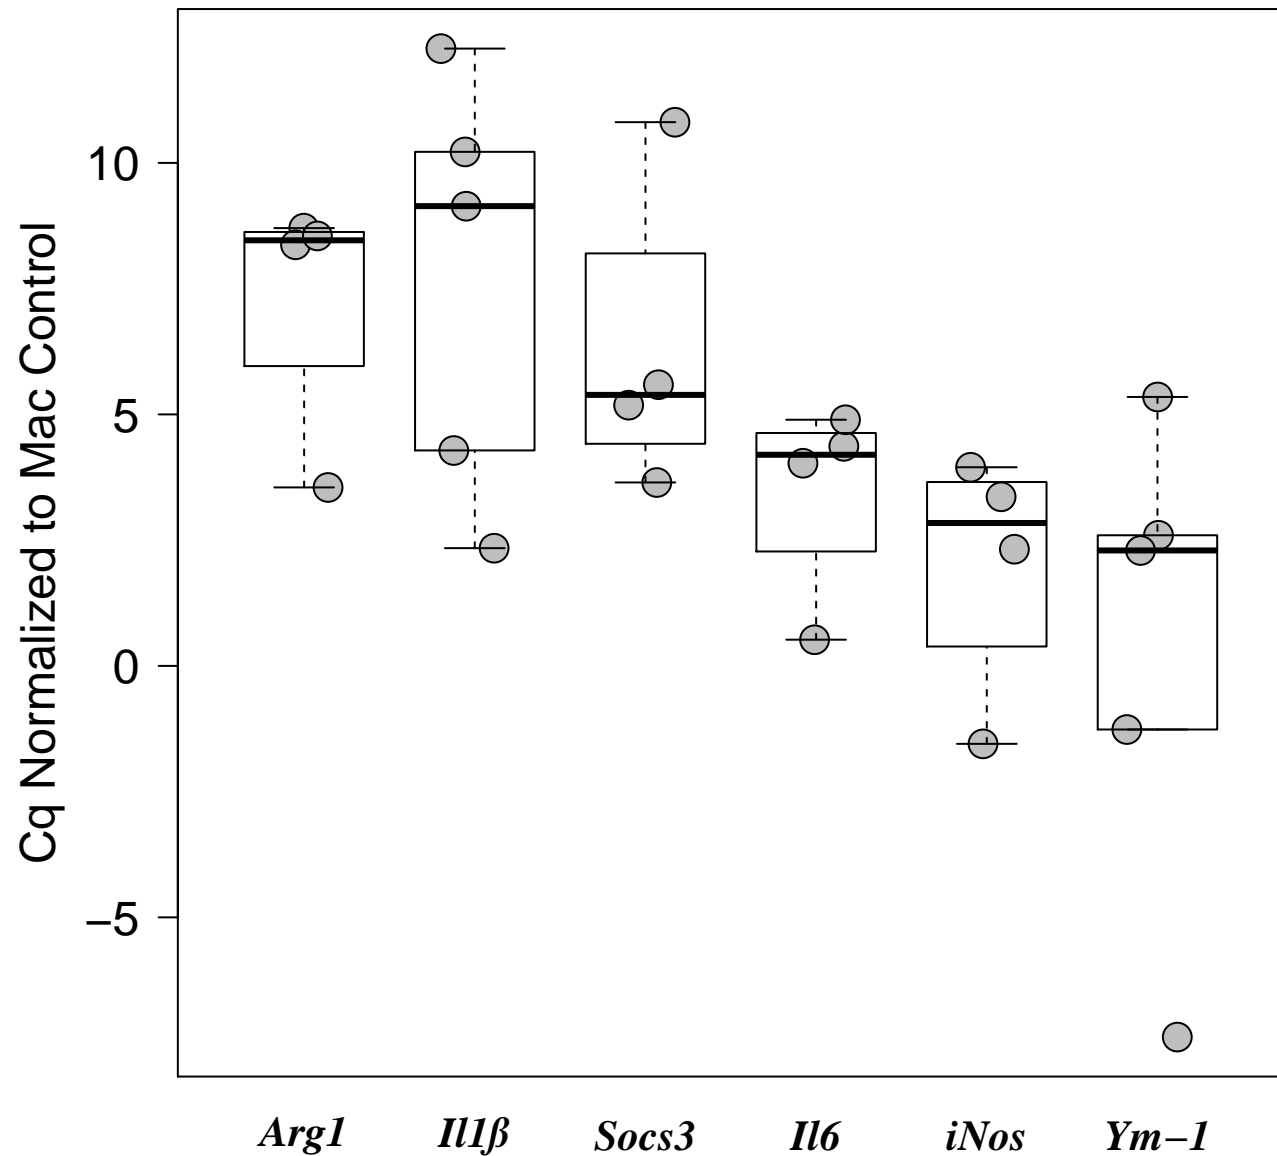

H3255 (Arg1 SD = 1.1)

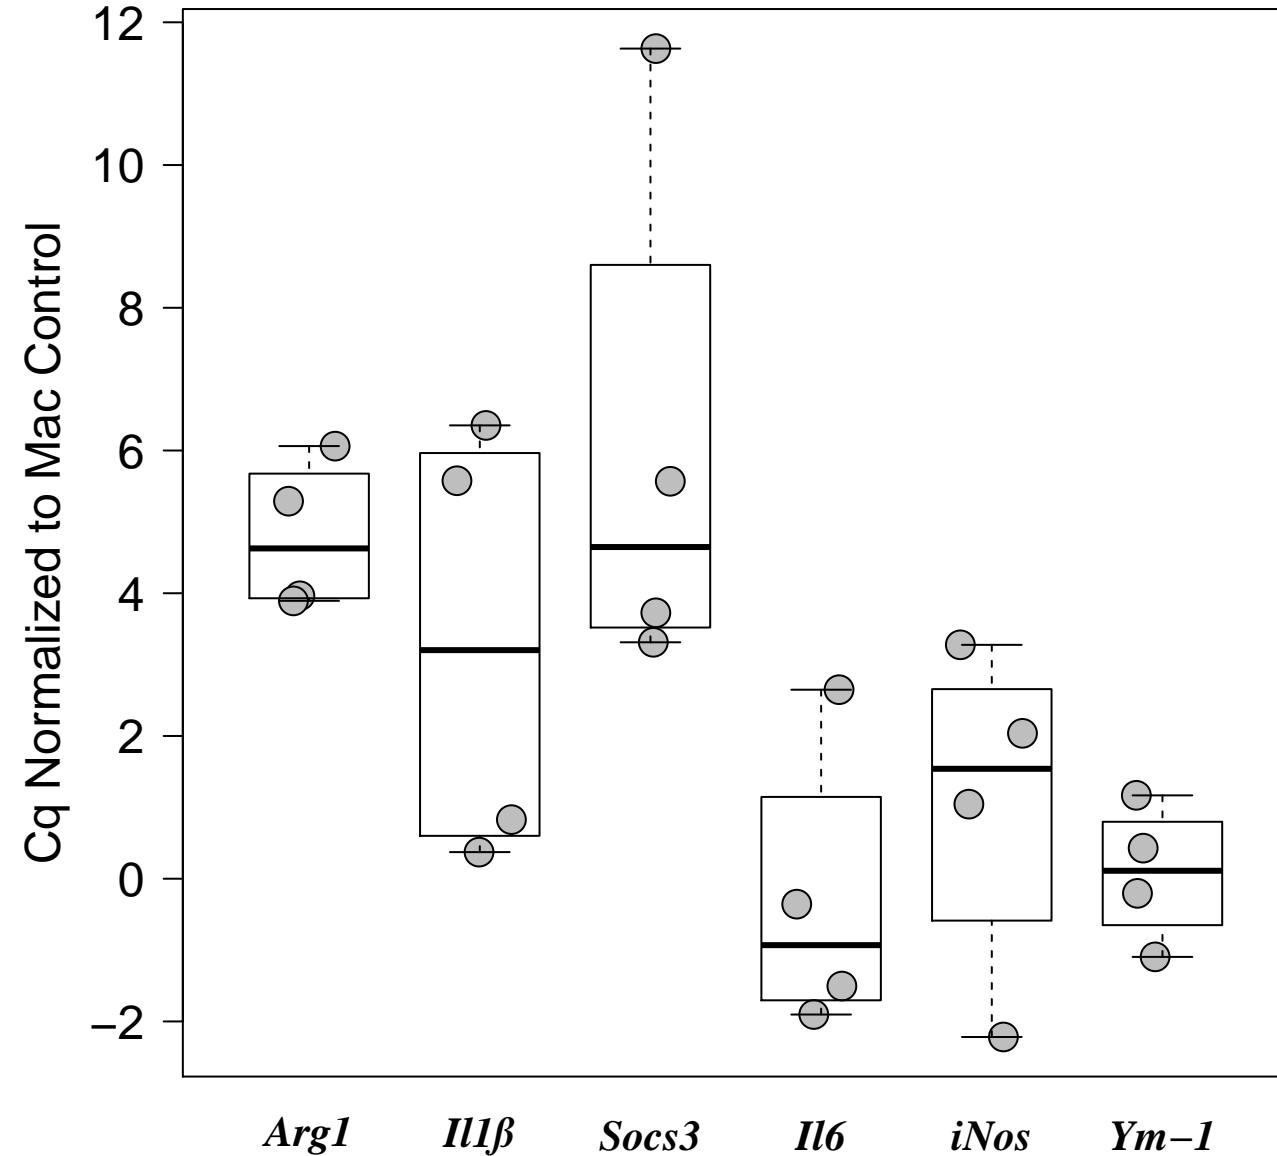

H358 (Arg1 SD = 1.5)

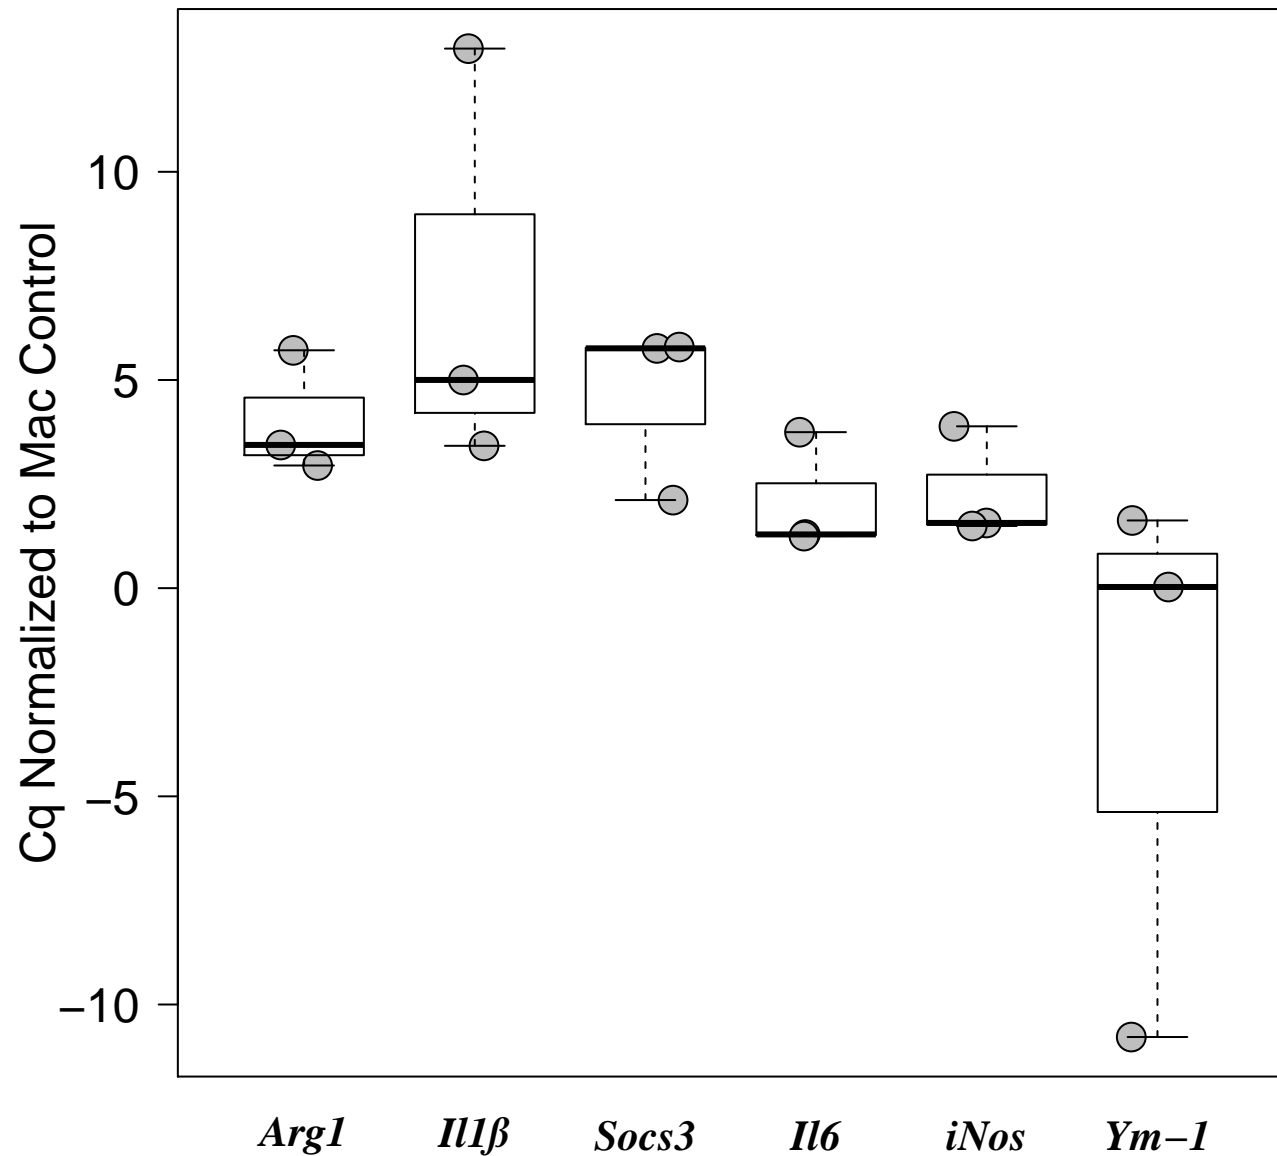

H441 (Arg1 SD = 2.2)

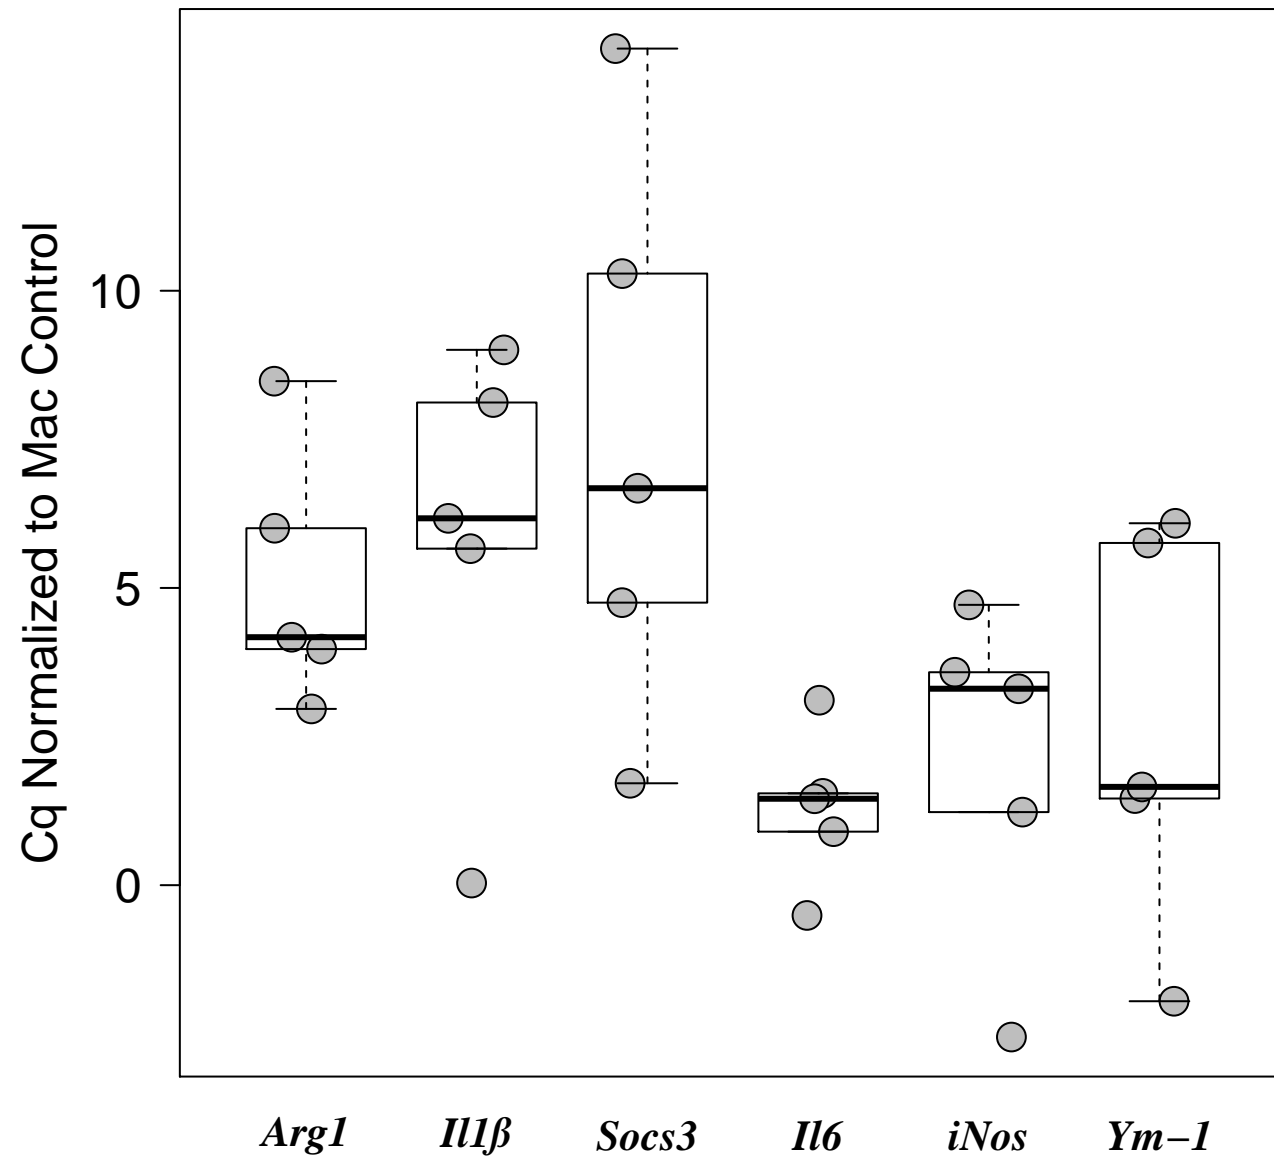

H446 (Arg1 SD = 2.9)

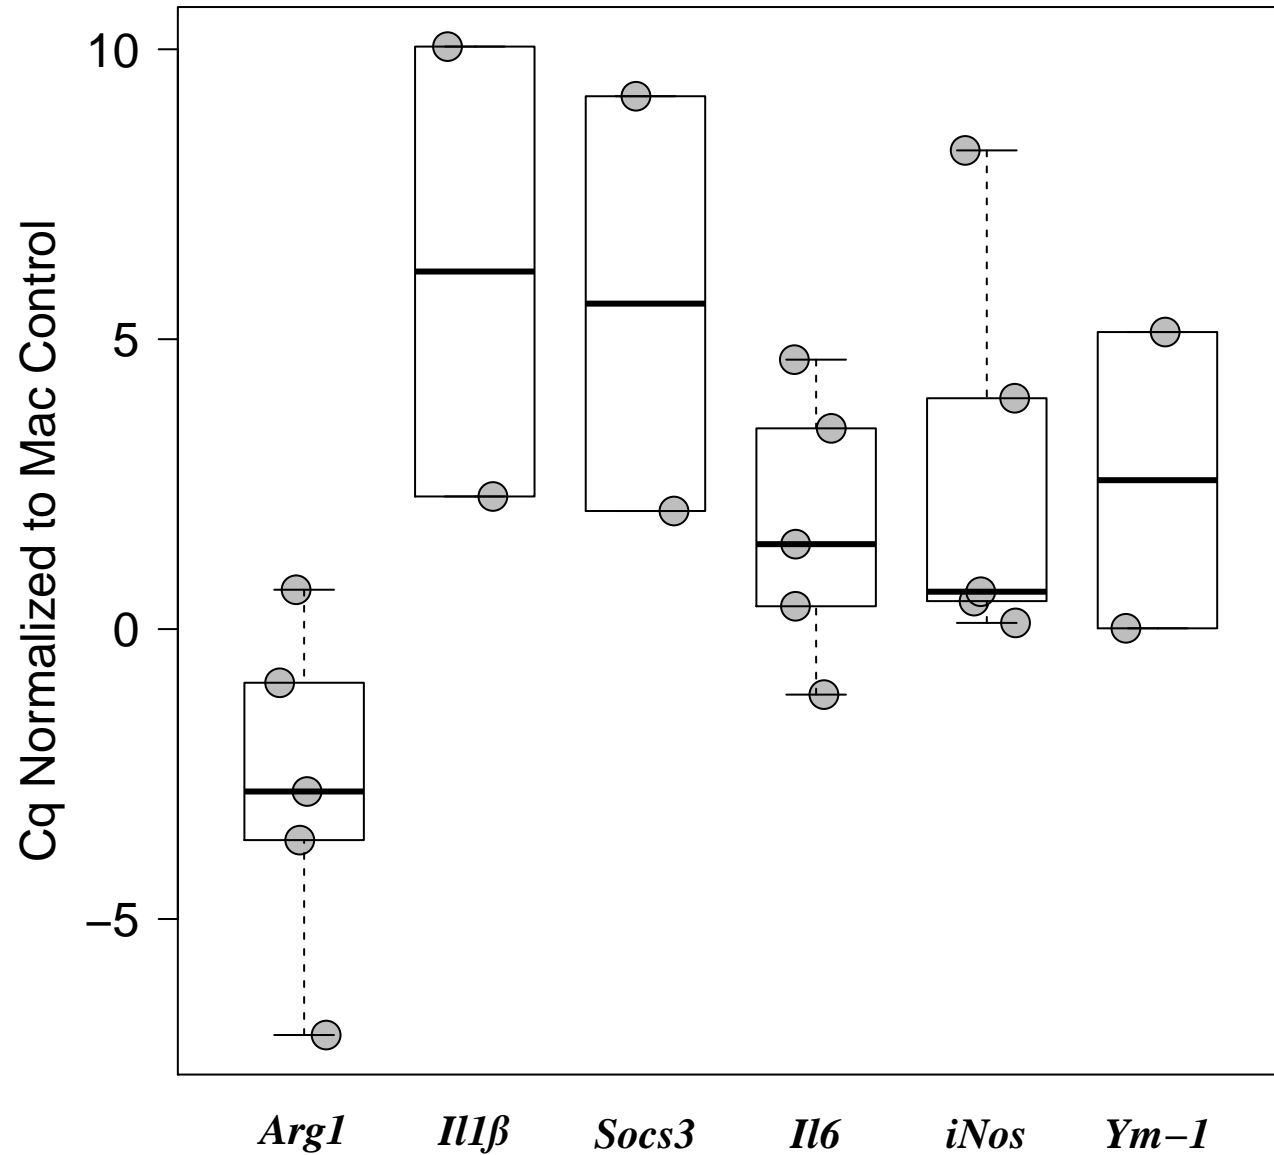

H460 (Arg1 SD = 2.7)

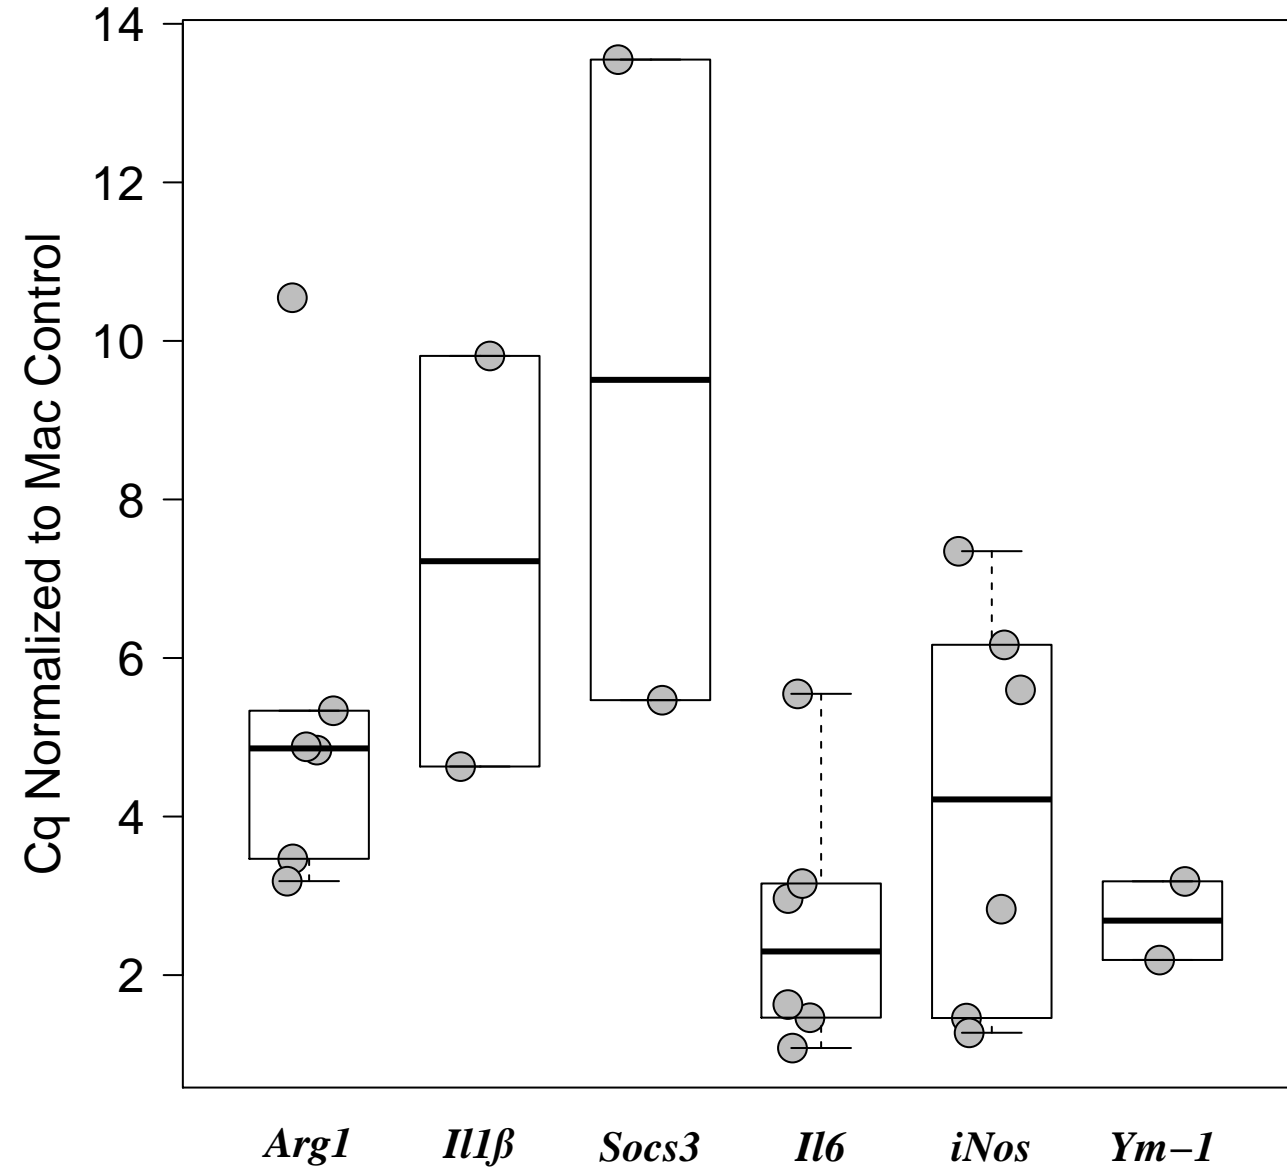

H522 (Arg1 SD = 3.1)

H596 (Arg1 SD = 1.5)

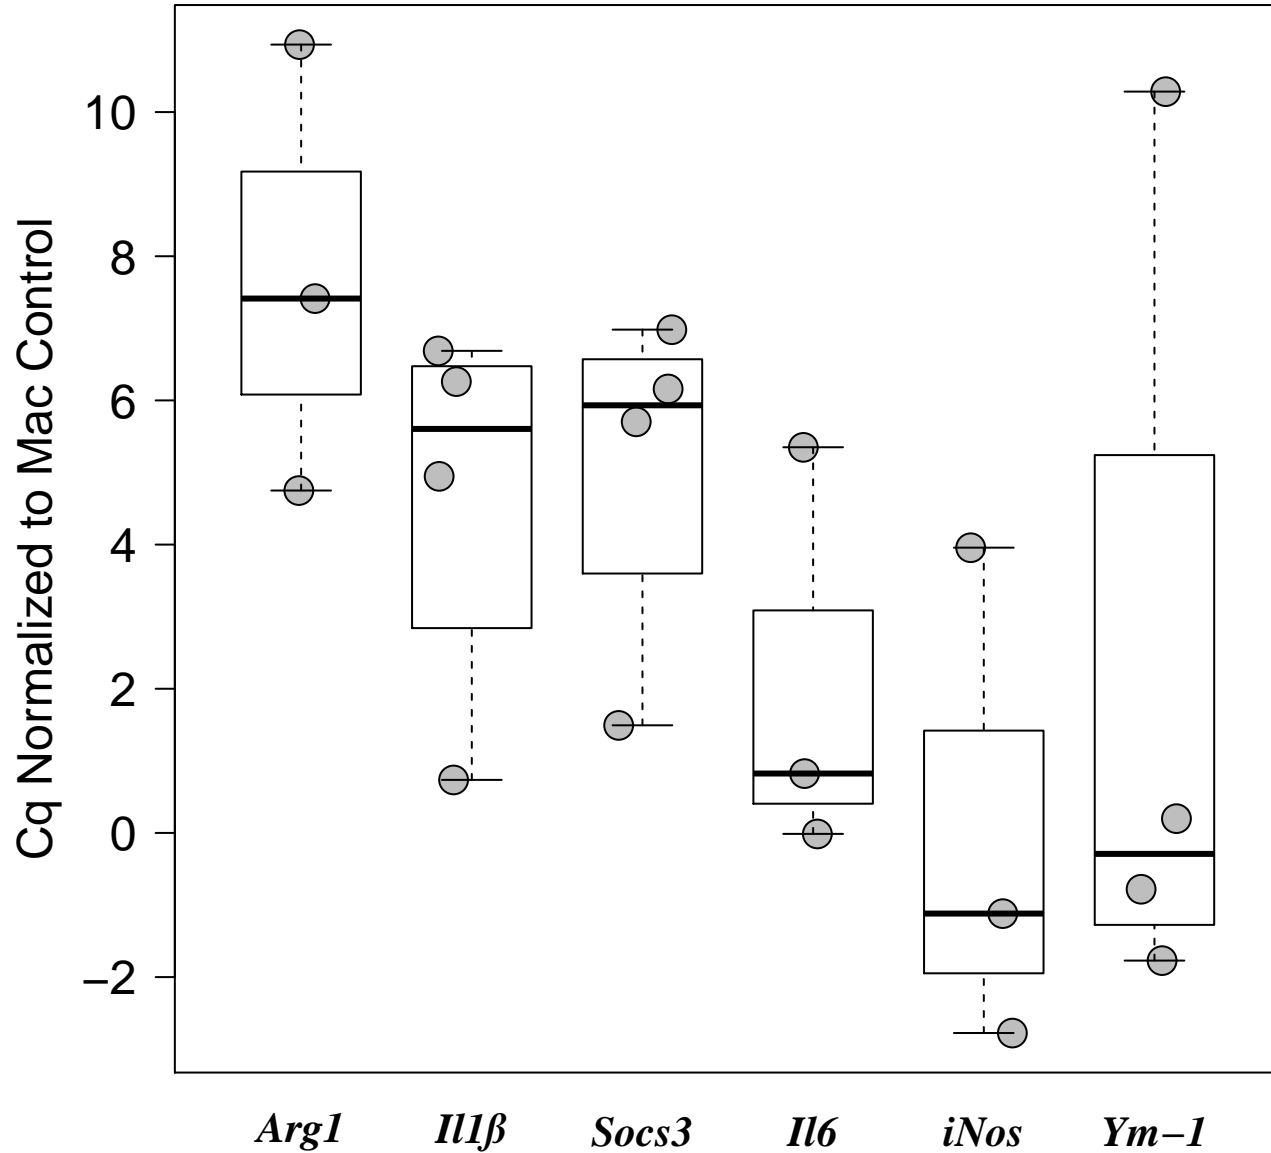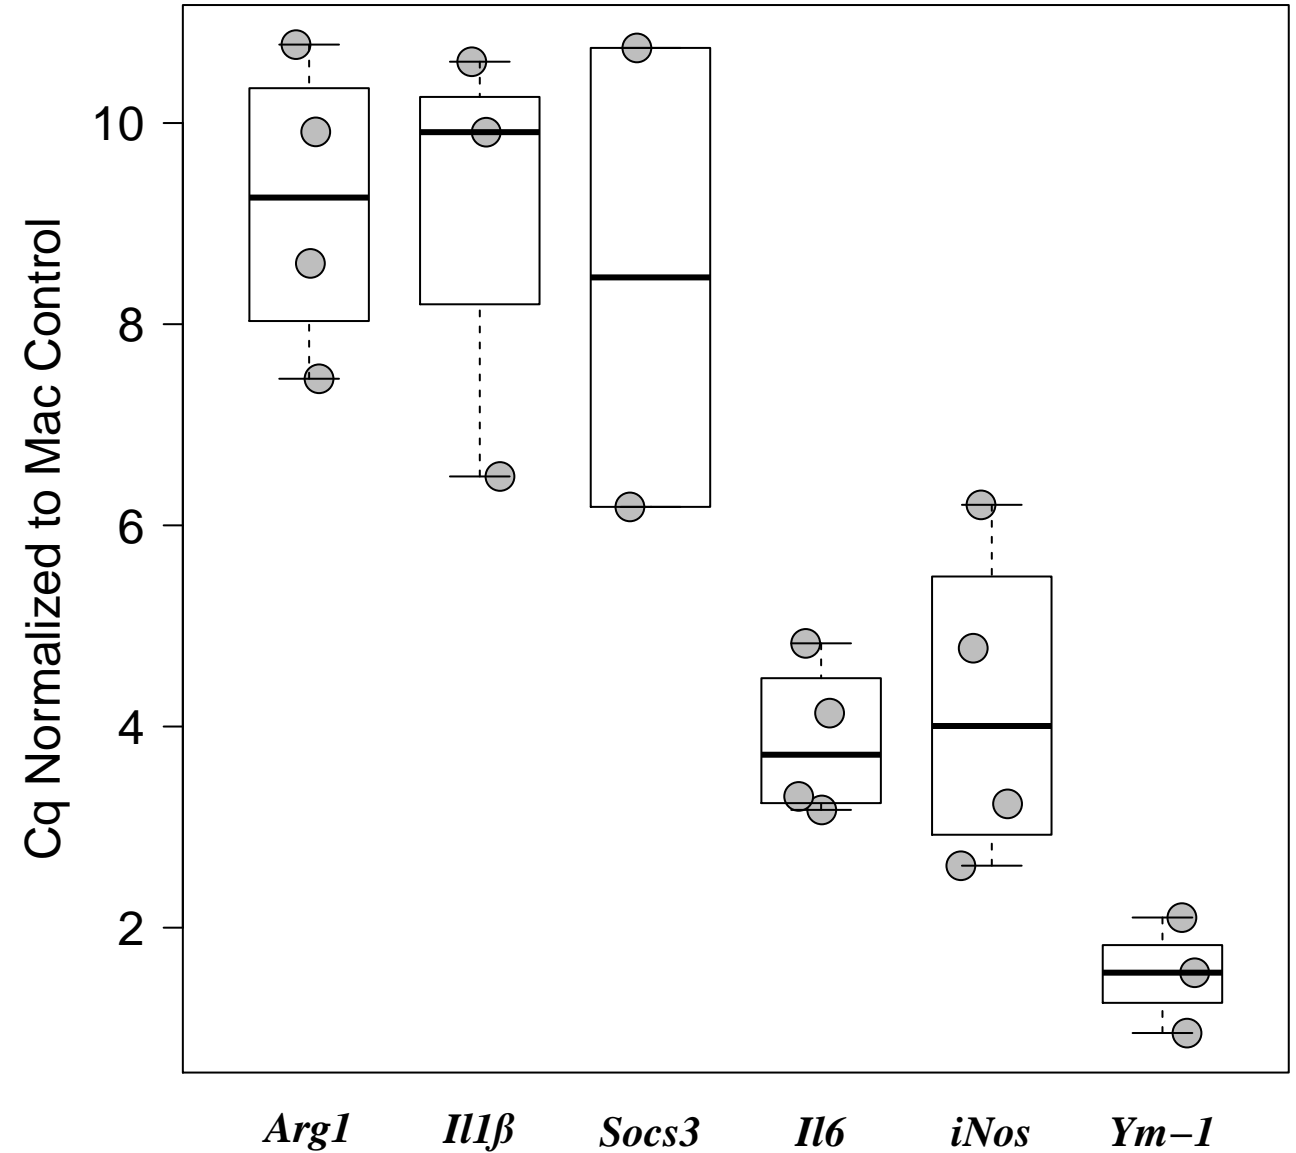



H647 (Arg1 SD = 1.8)

H650 (Arg1 SD = 2.5)

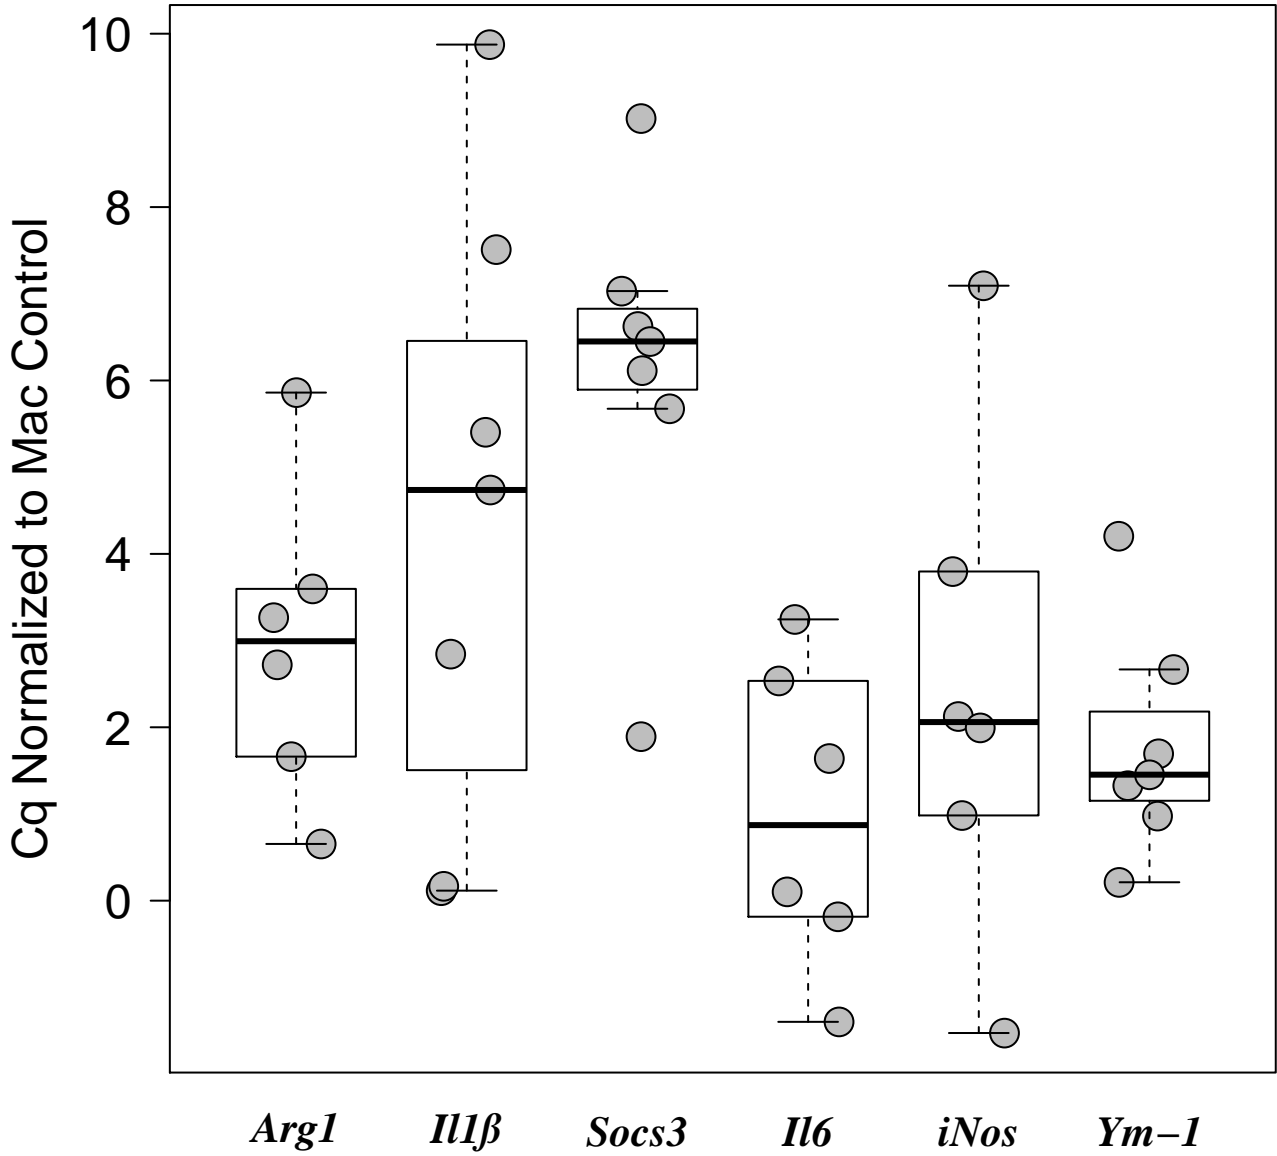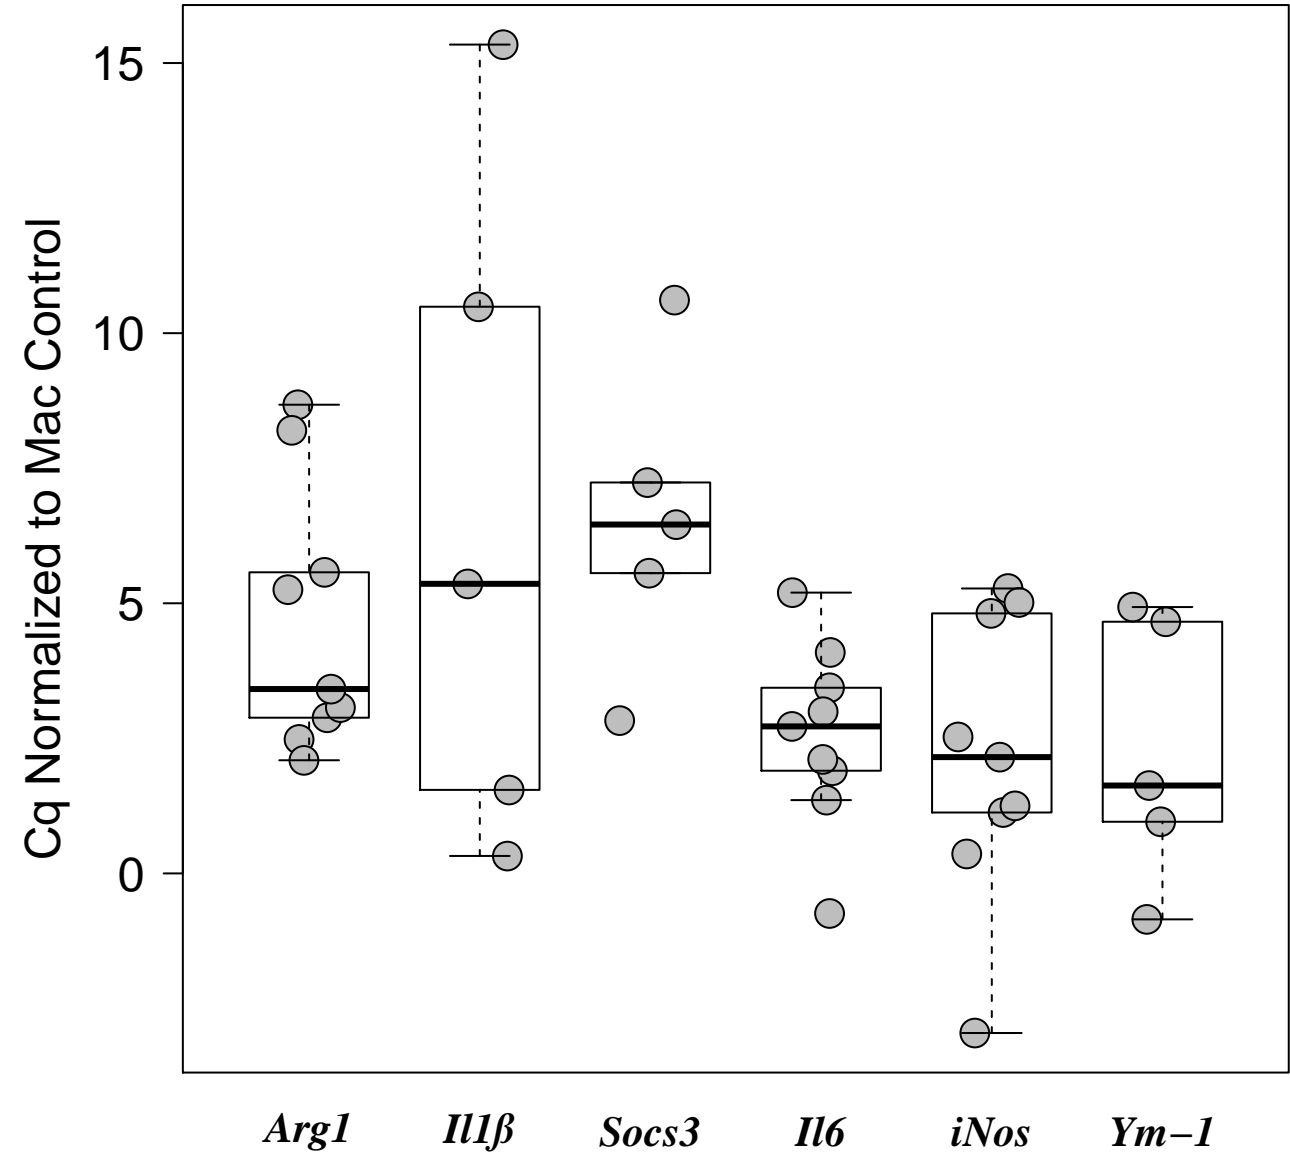

H661 (Arg1 SD = 3.9)

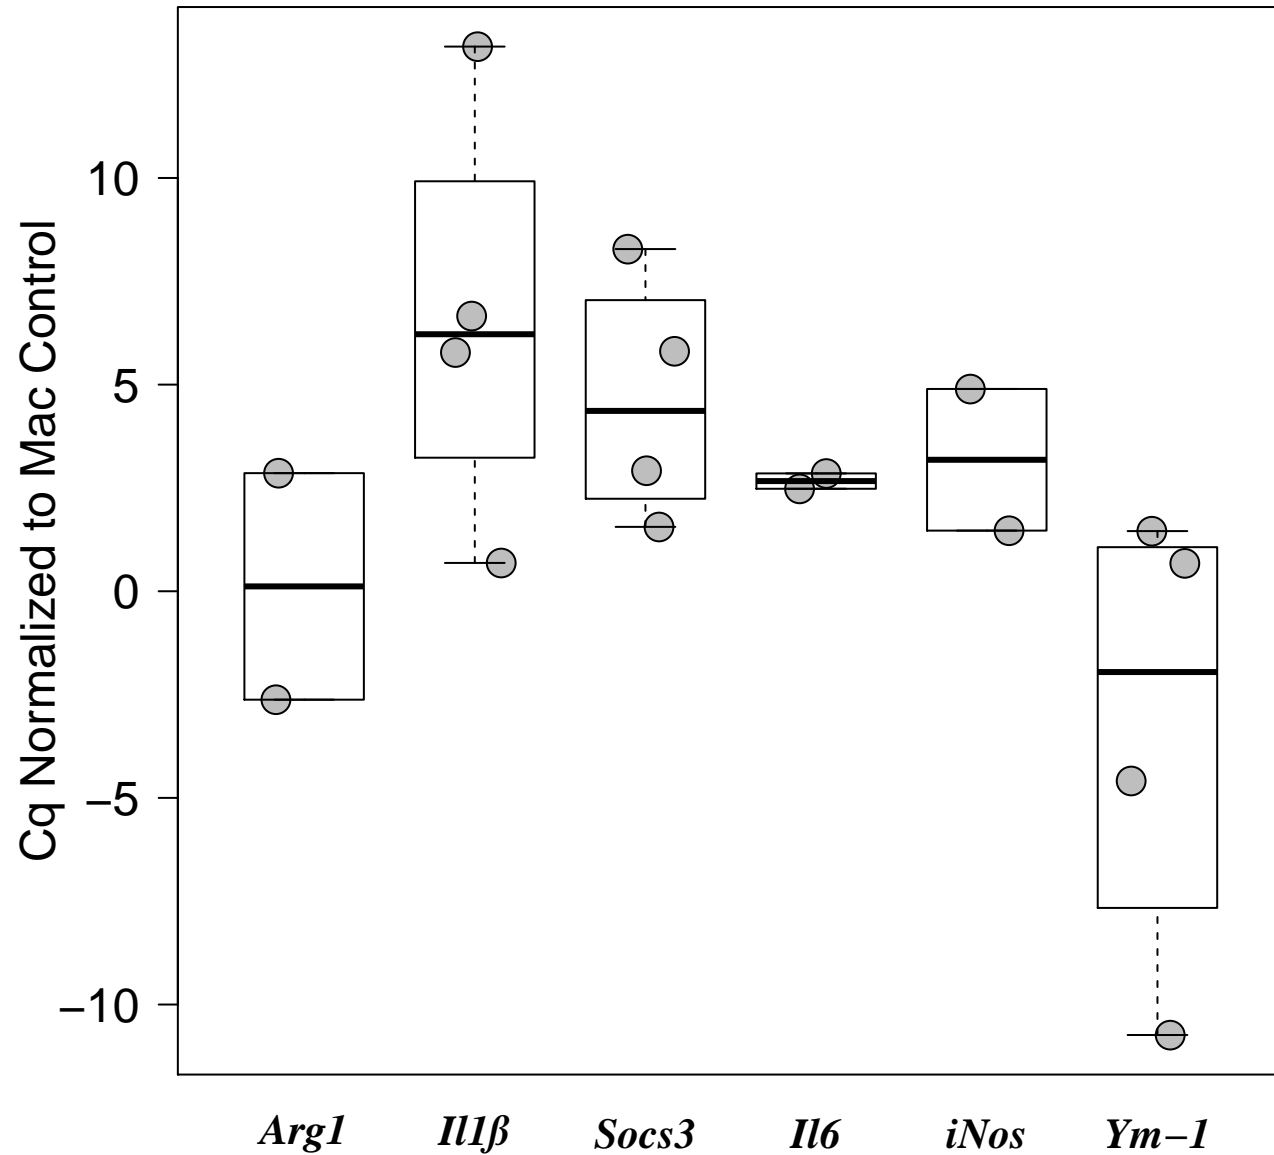

H820 (Arg1 SD = 2)

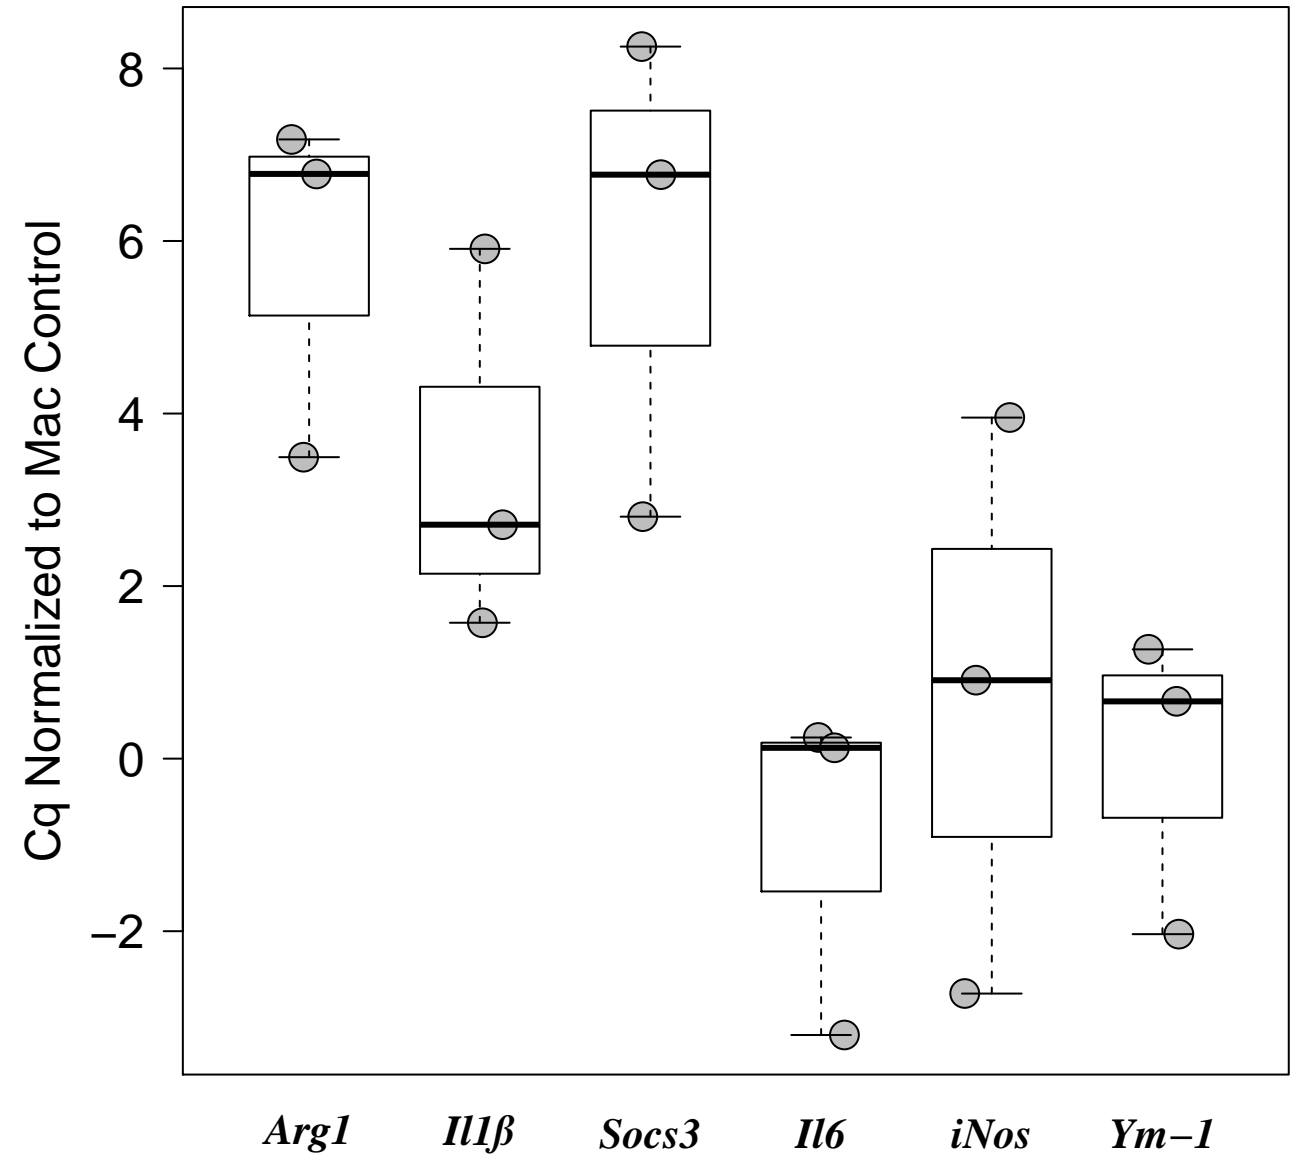

H838 (Arg1 SD = 2.6)

H920 (Arg1 SD = 2.9)

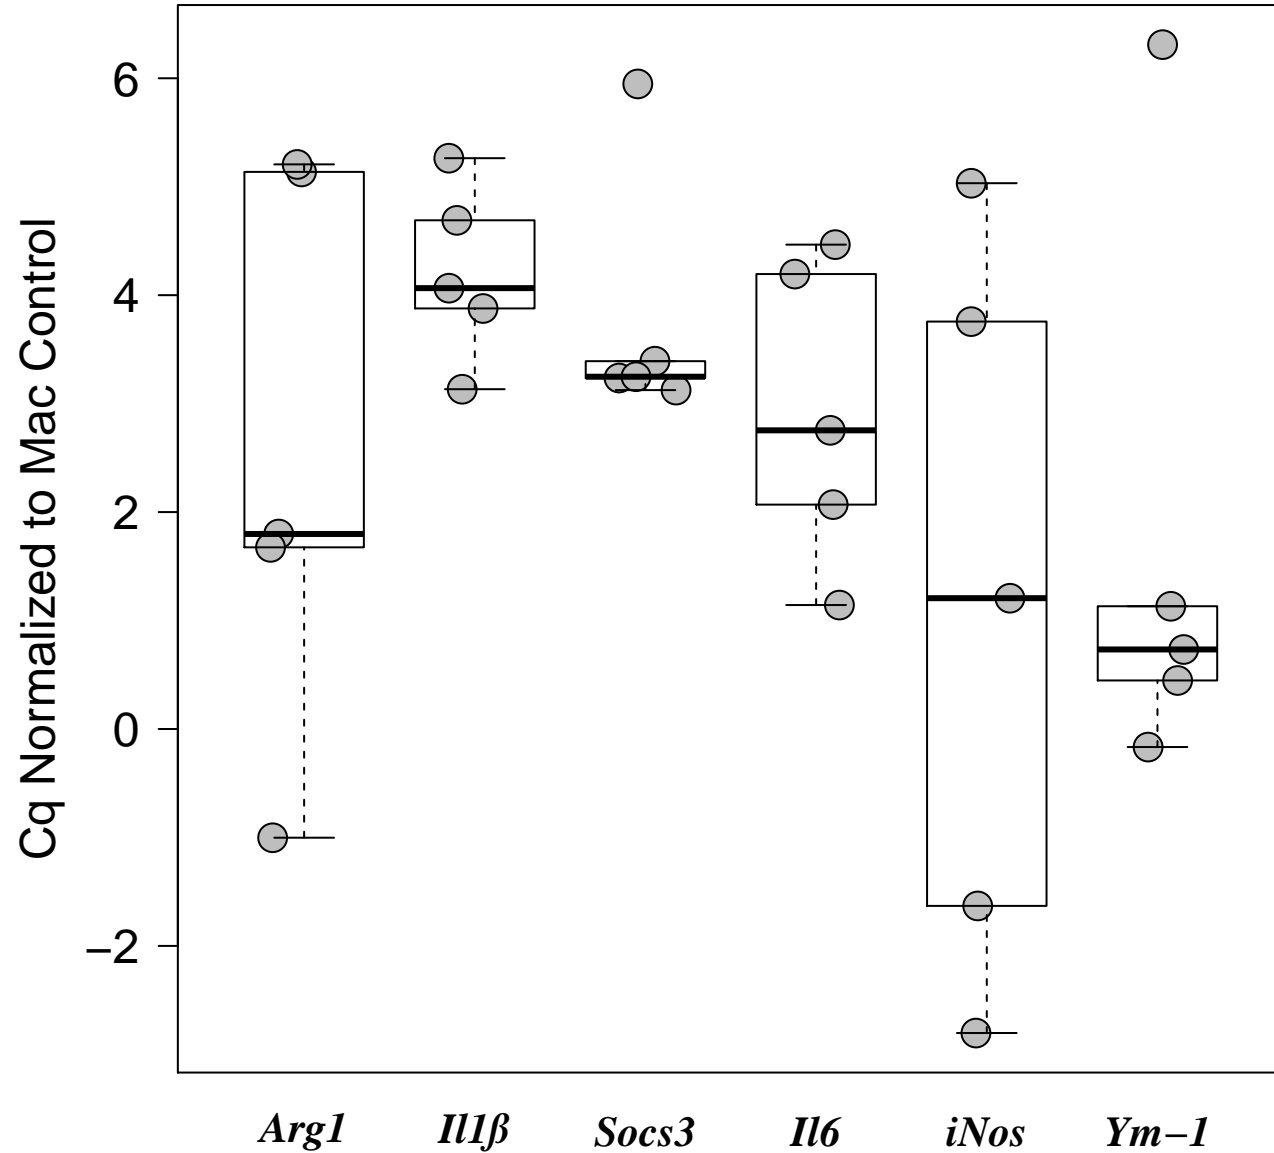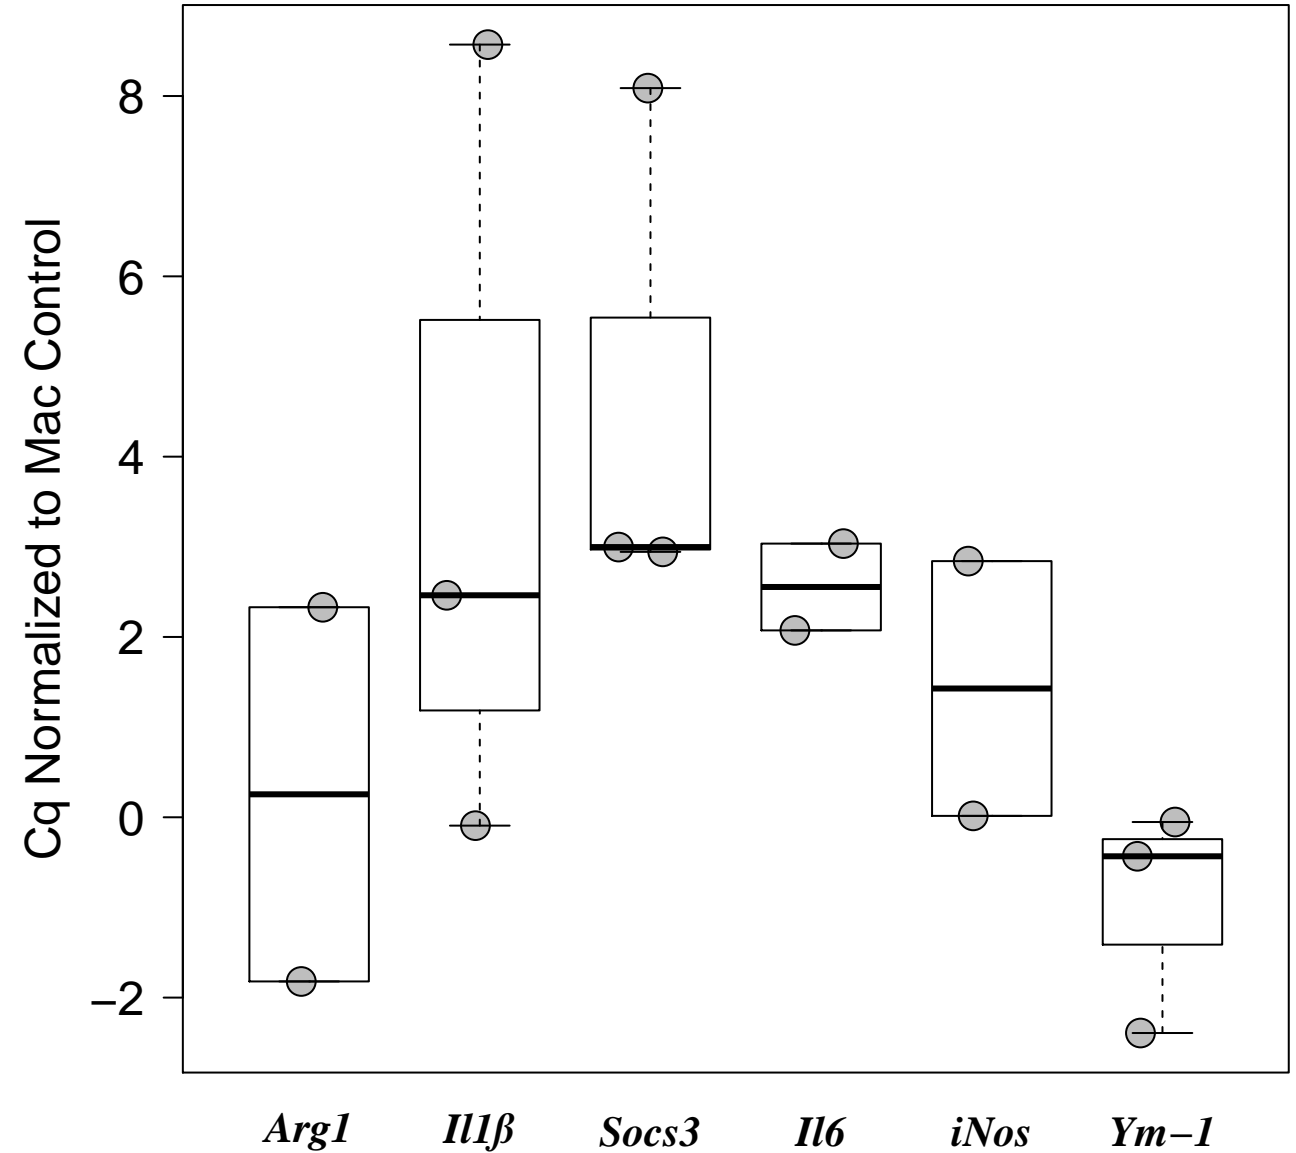

**HBEC3-KT (Arg1 SD = 3.1)**

**HCC1171 (Arg1 SD = 1.8)**

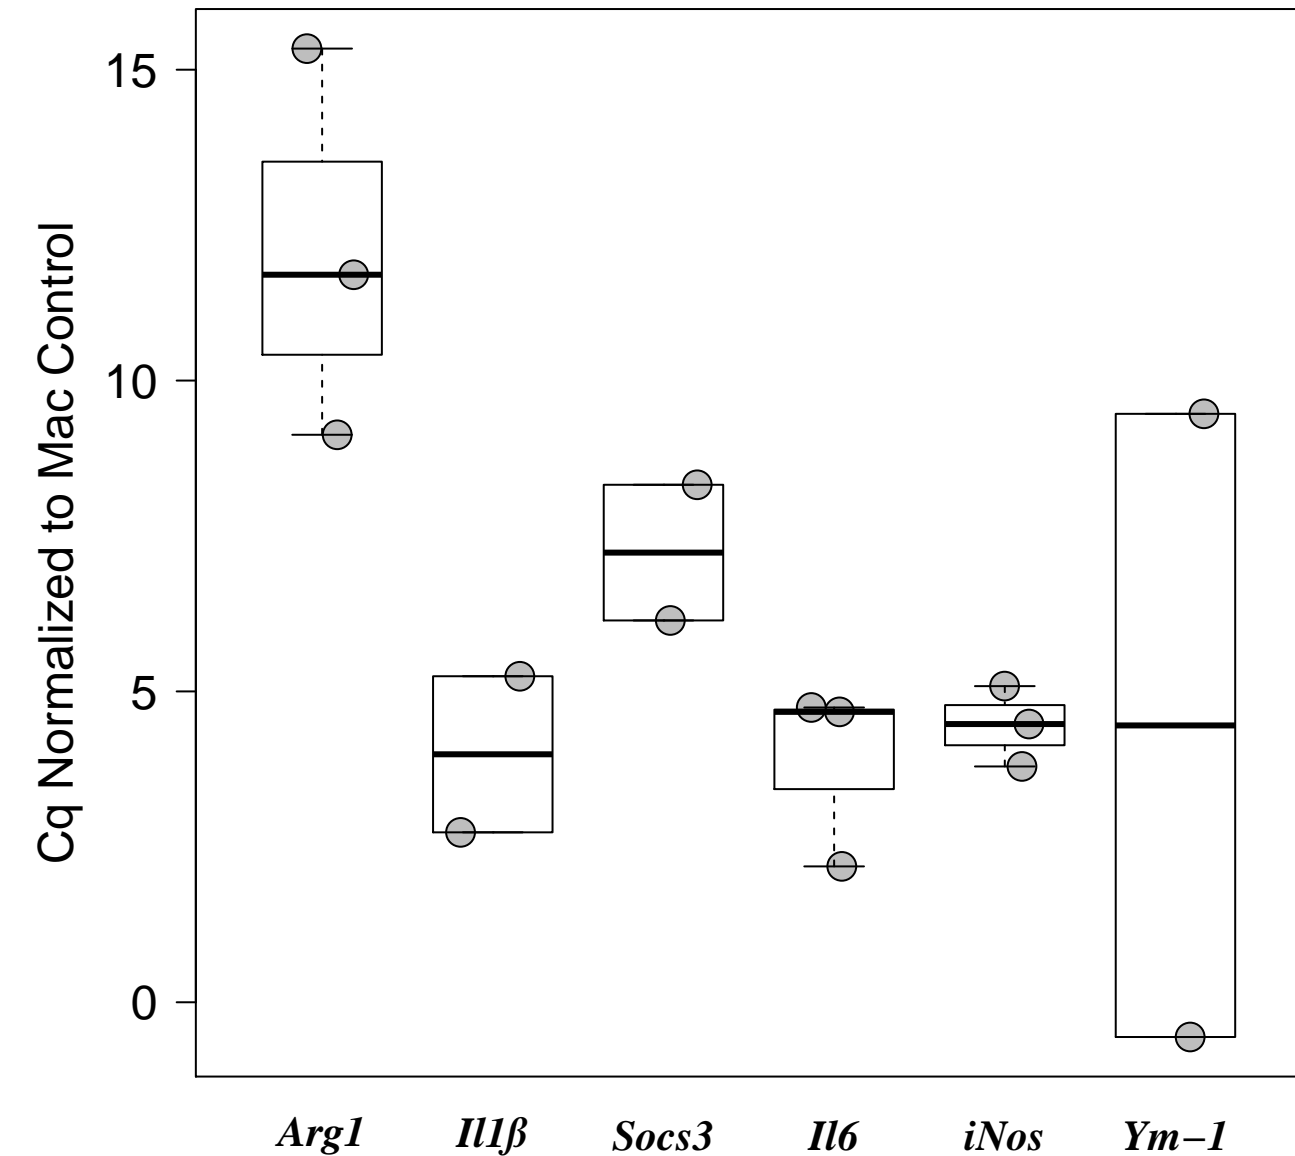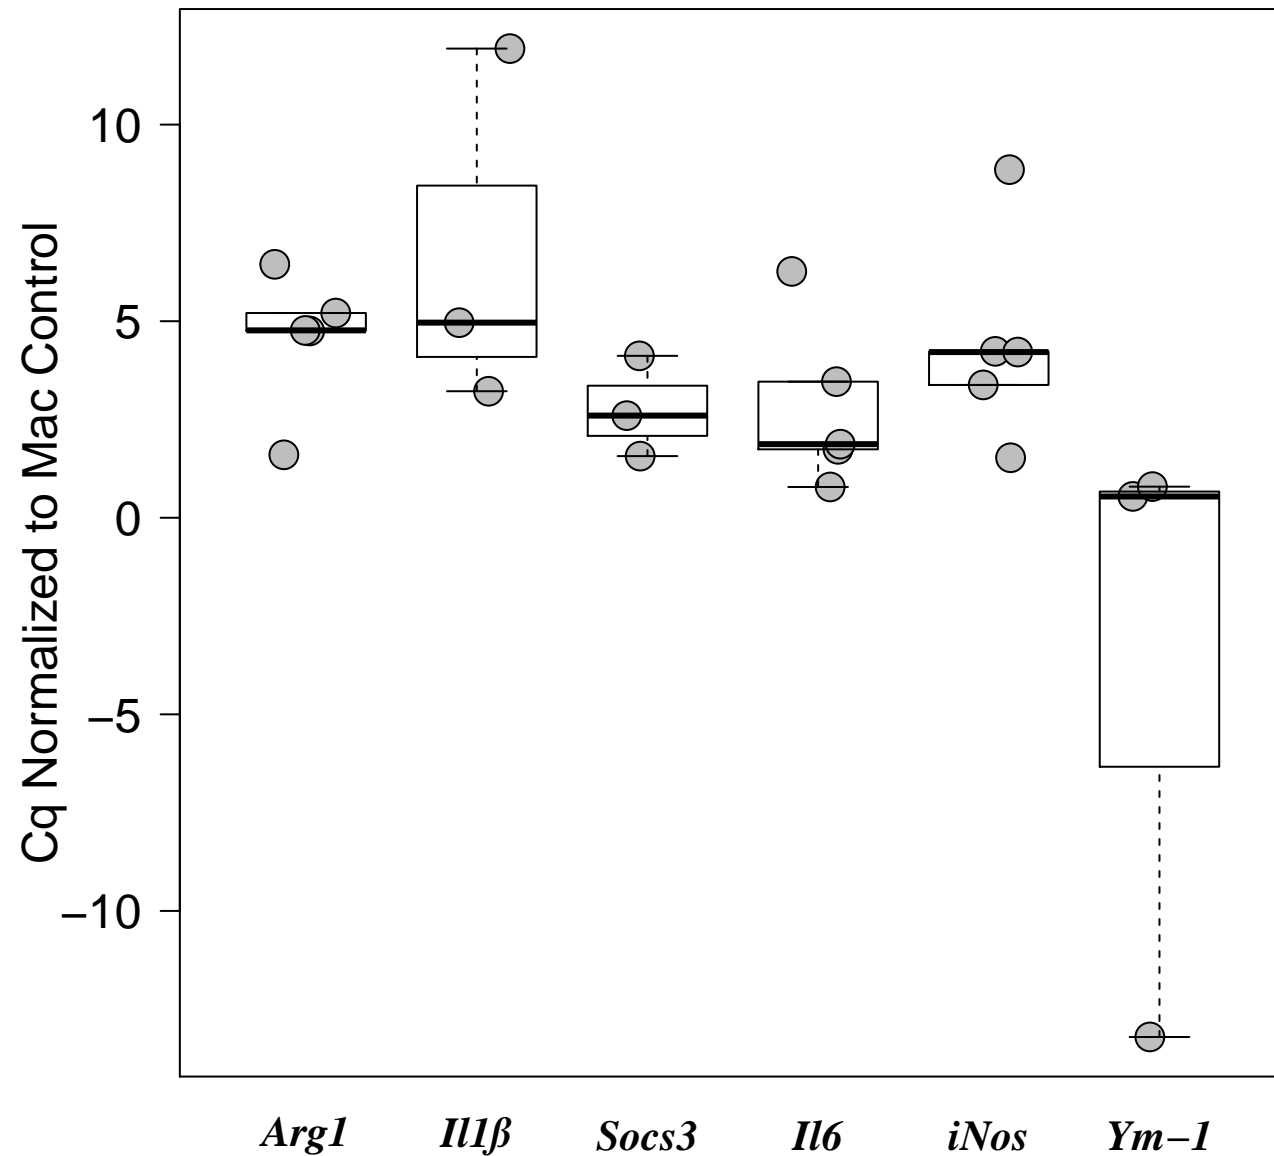

HCC15 (Arg1 SD = 2.2)

HCC1833 (Arg1 SD = 1.5)

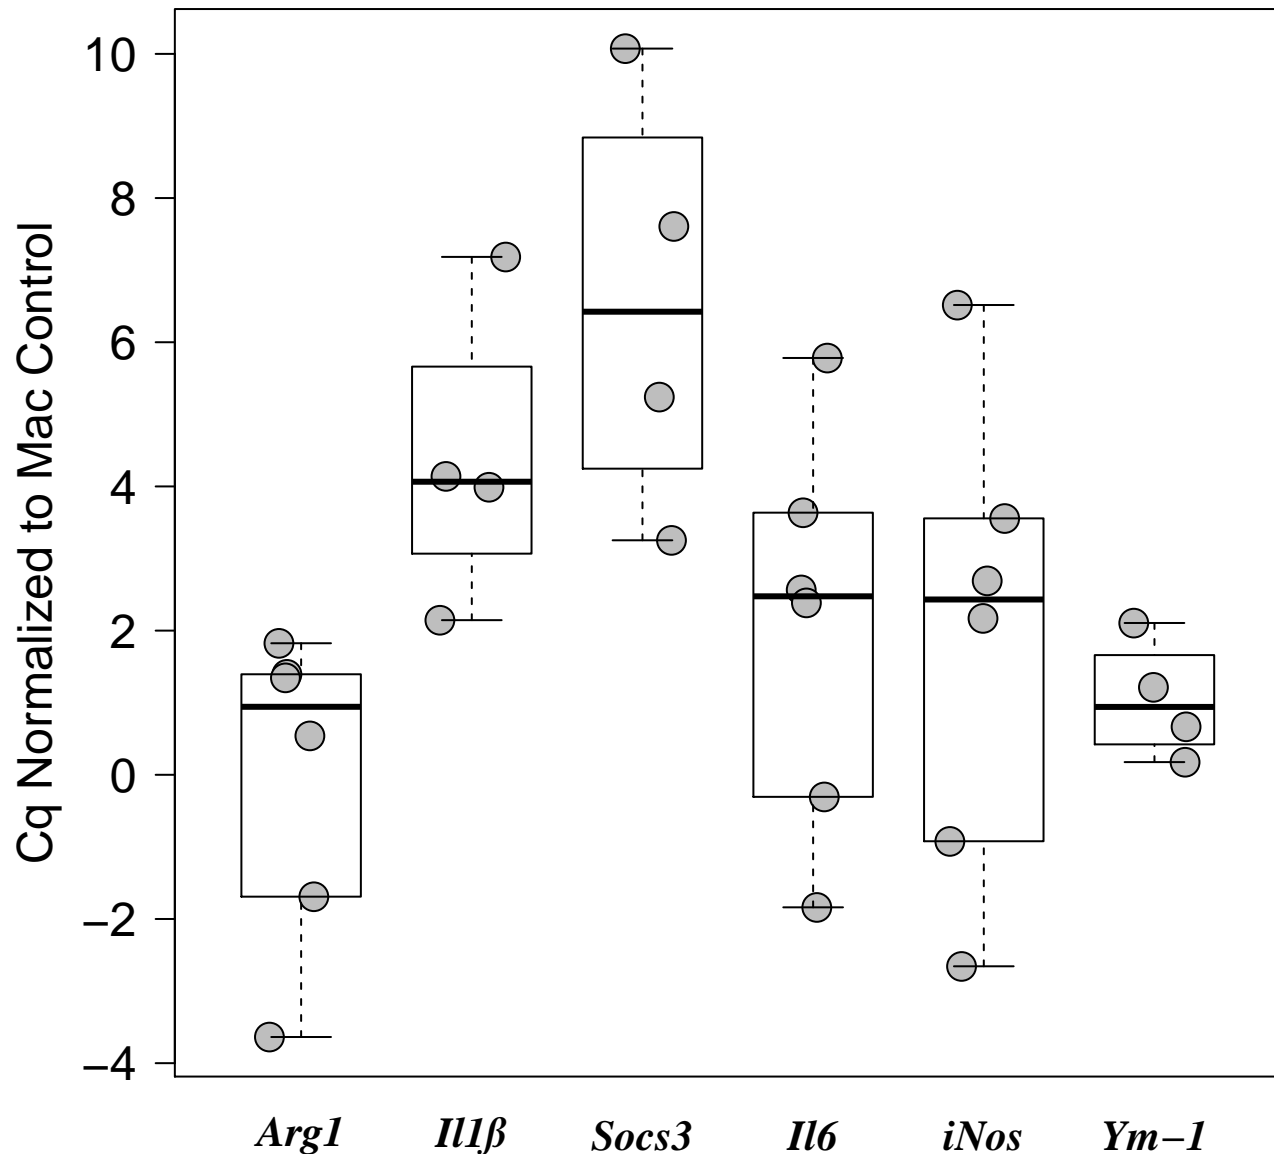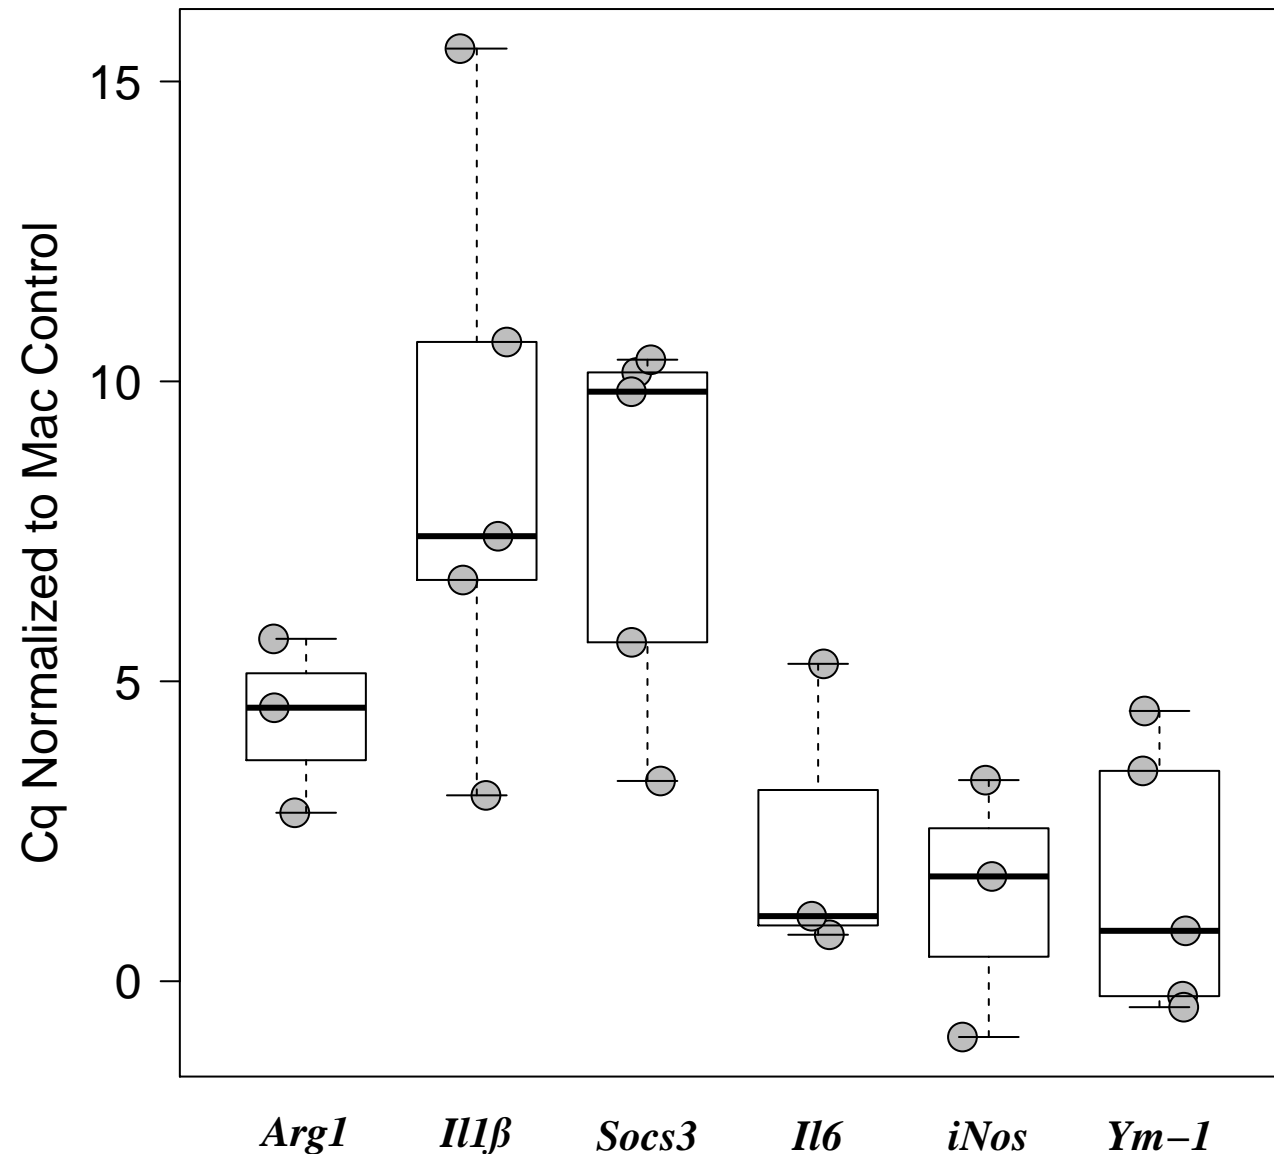

HCC193 (Arg1 SD = 2.4)

HCC2108 (Arg1 SD = 1.8)

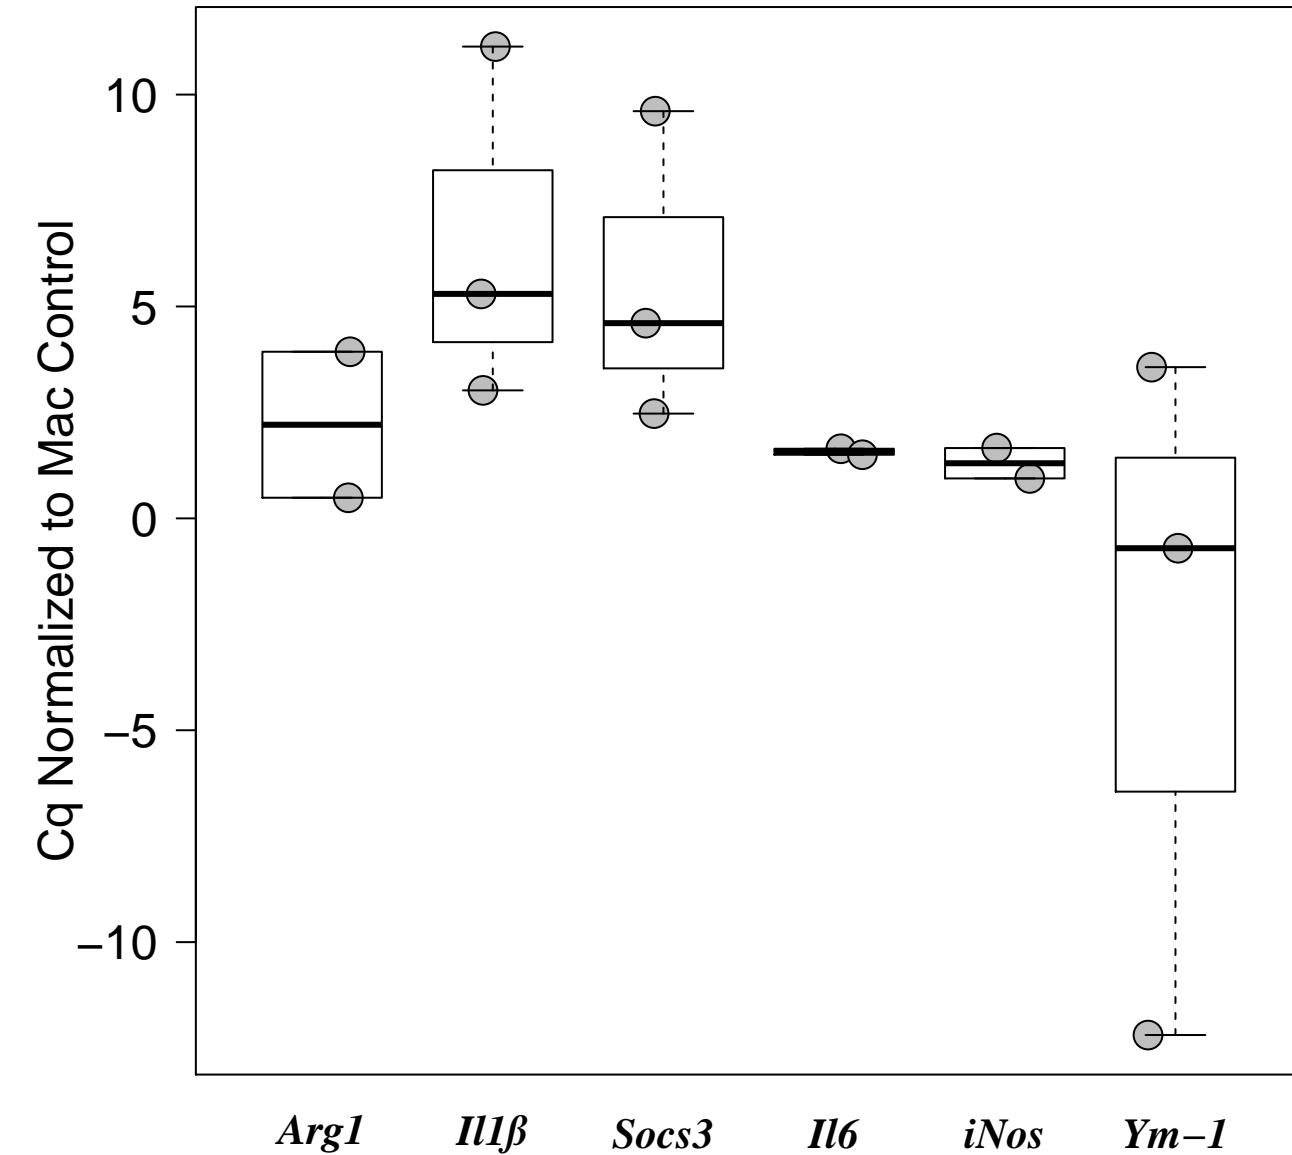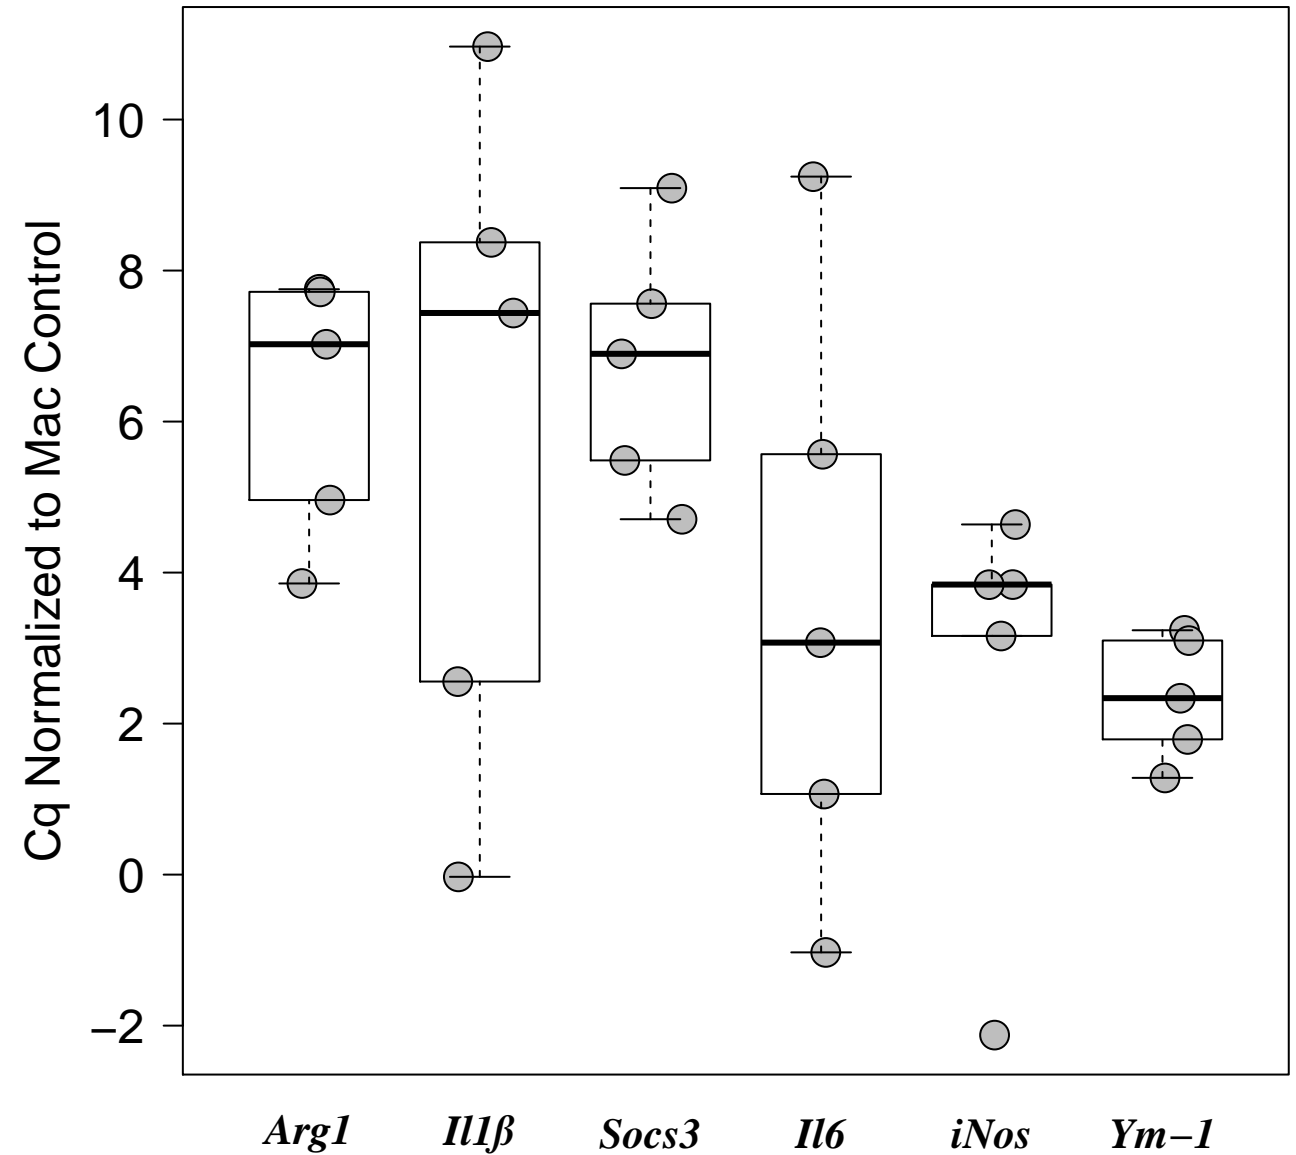

HCC2374 (Arg1 SD = 2.6)

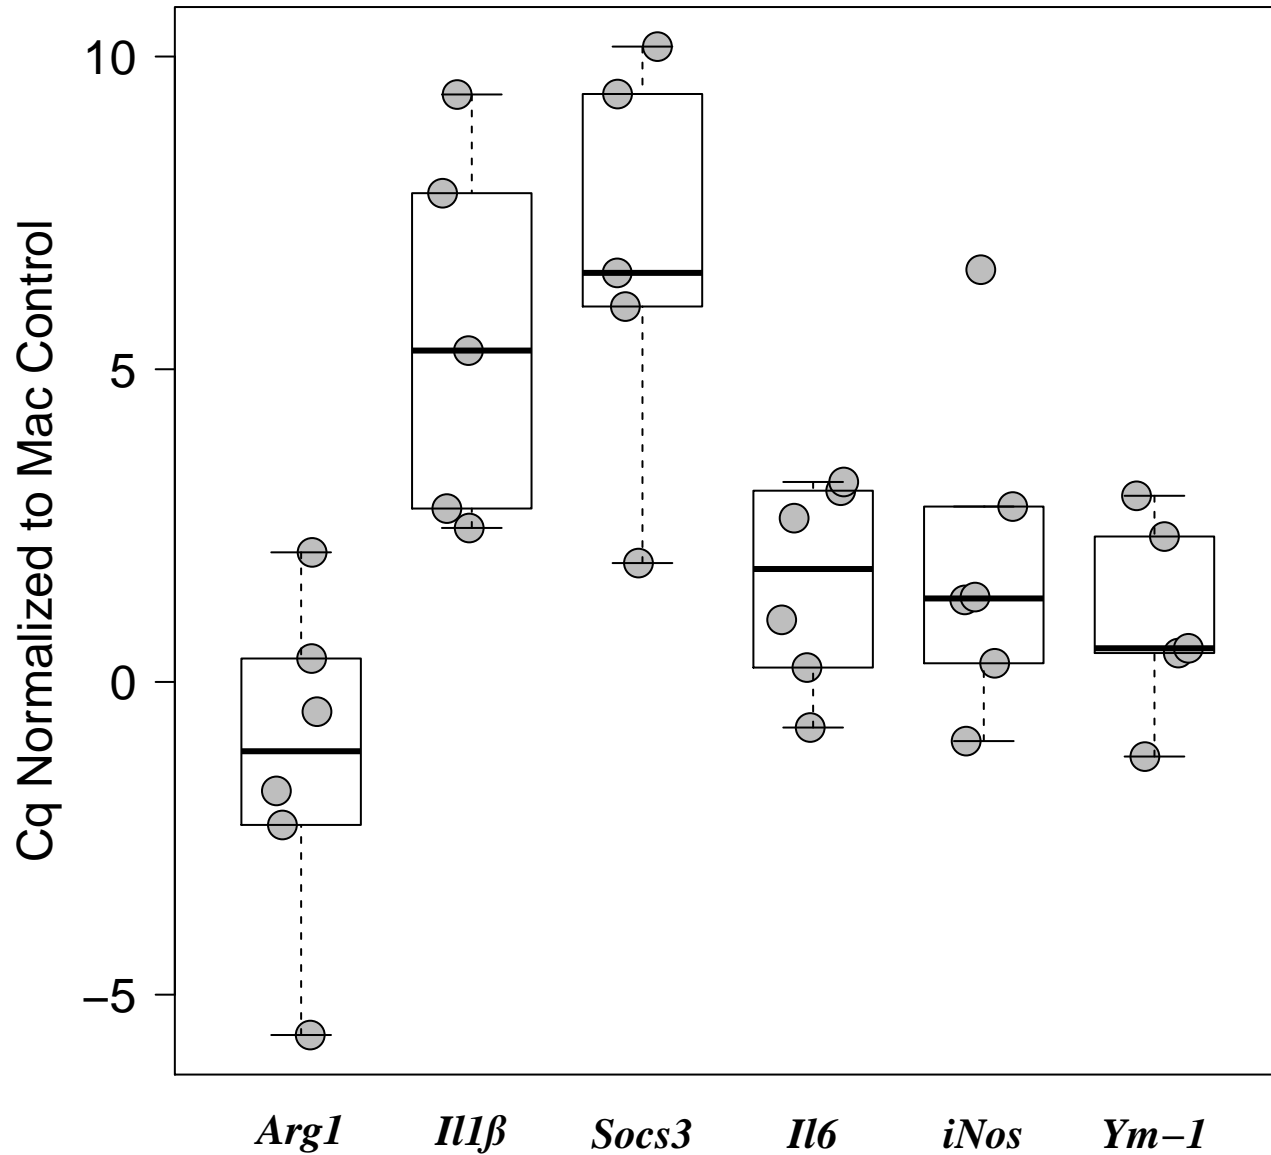

HCC2450 (Arg1 SD = 4.1)

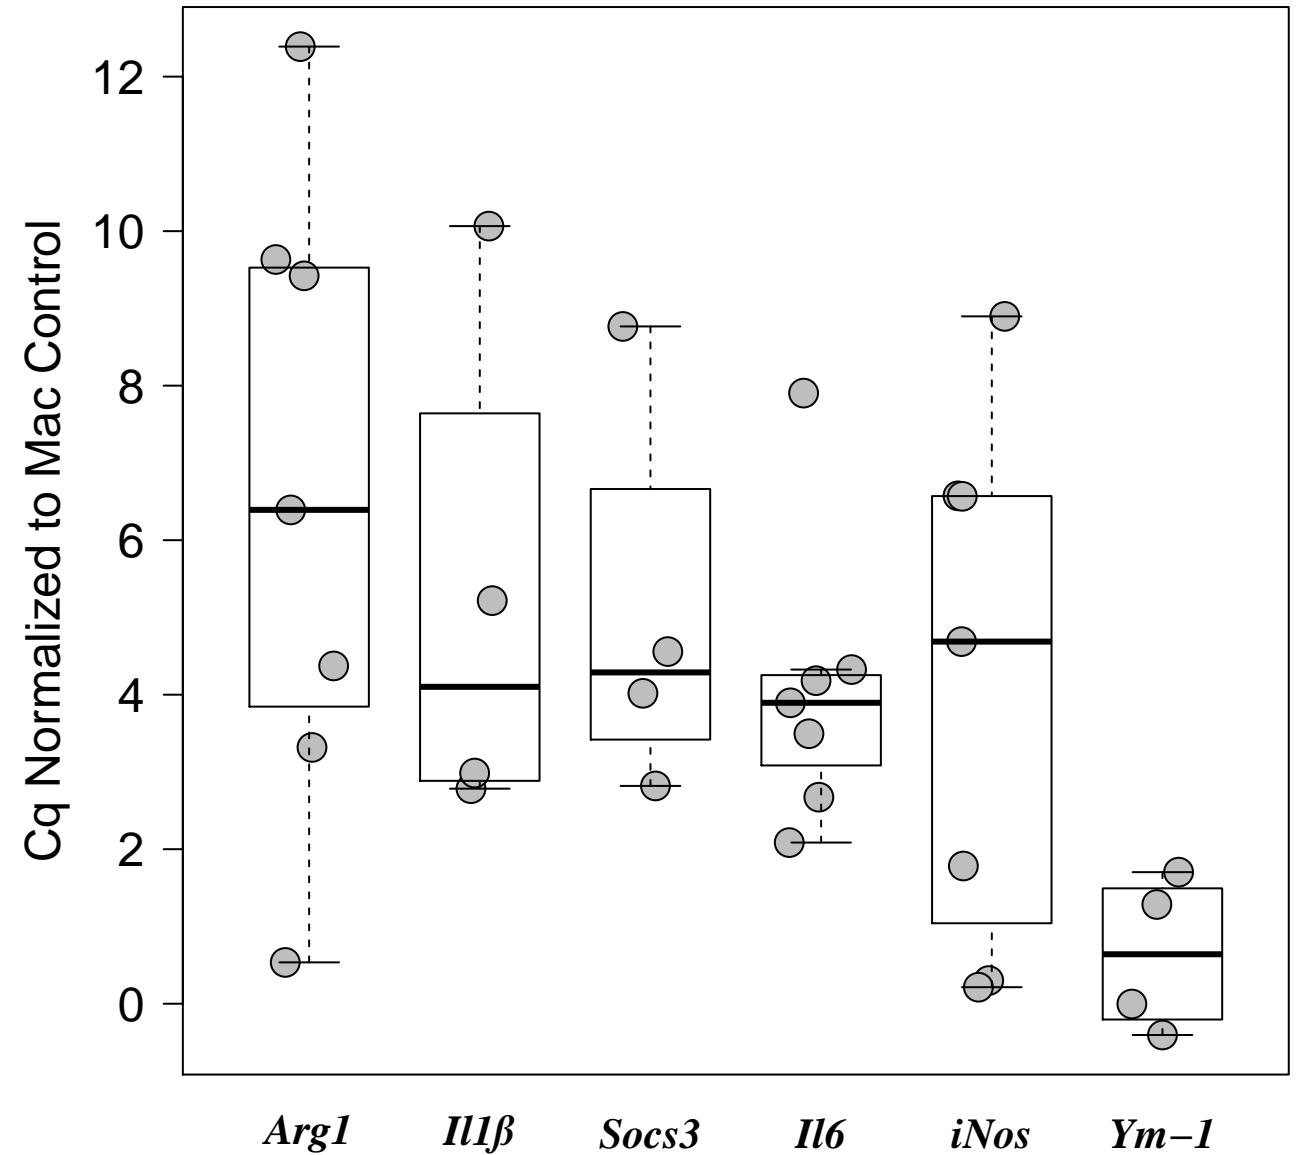

HCC2935 (Arg1 SD = 1.1)

HCC3051 (Arg1 SD = 1)

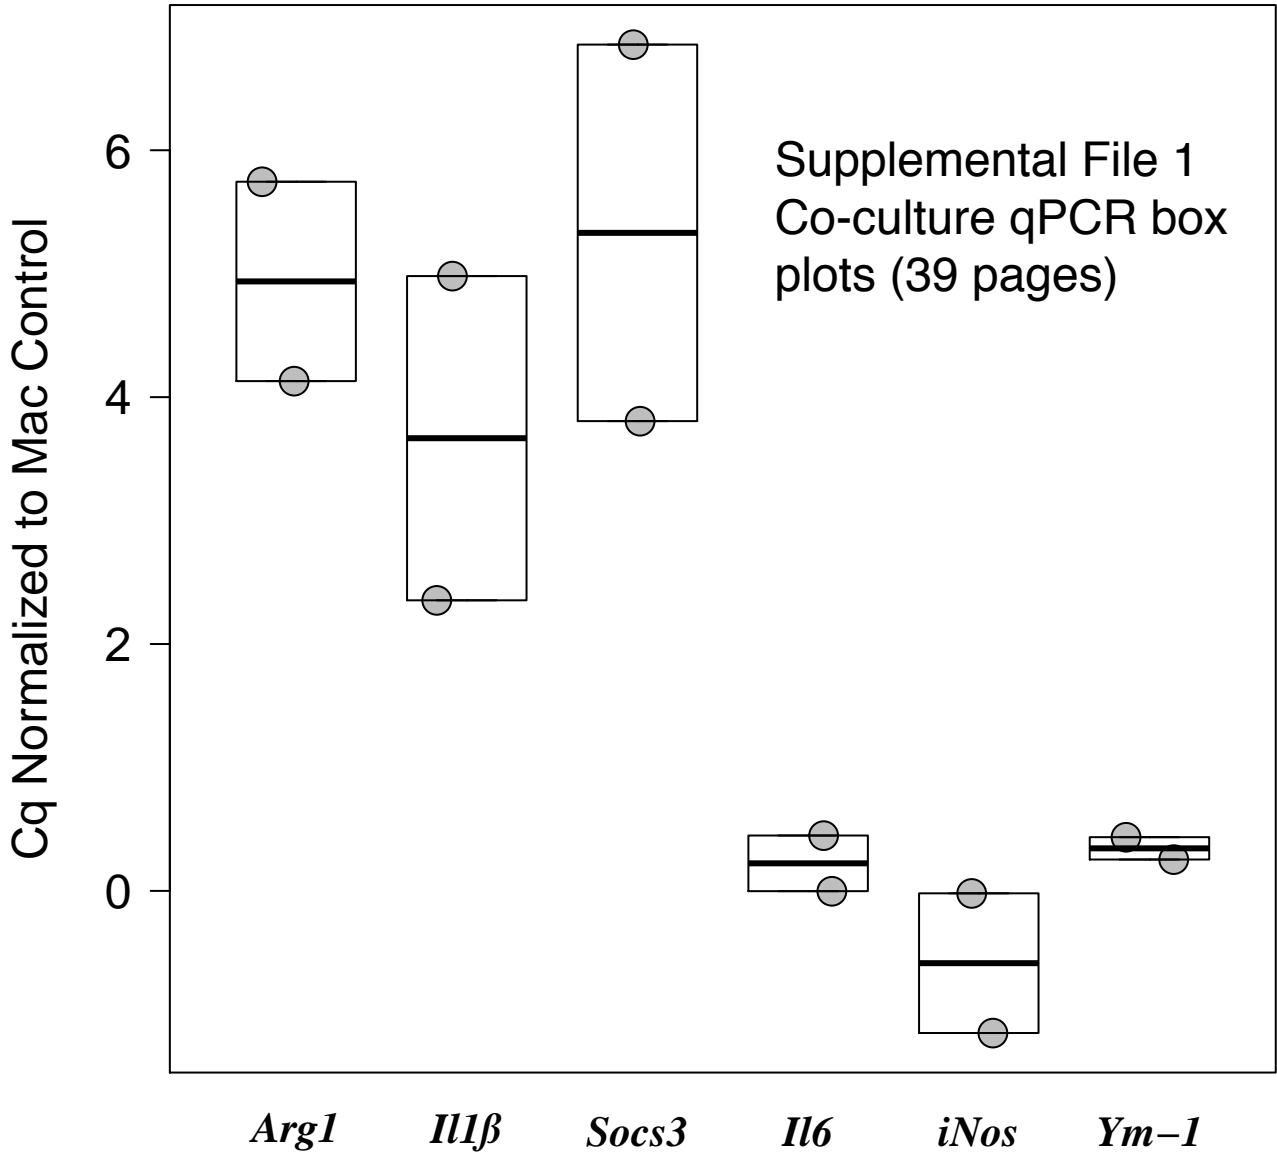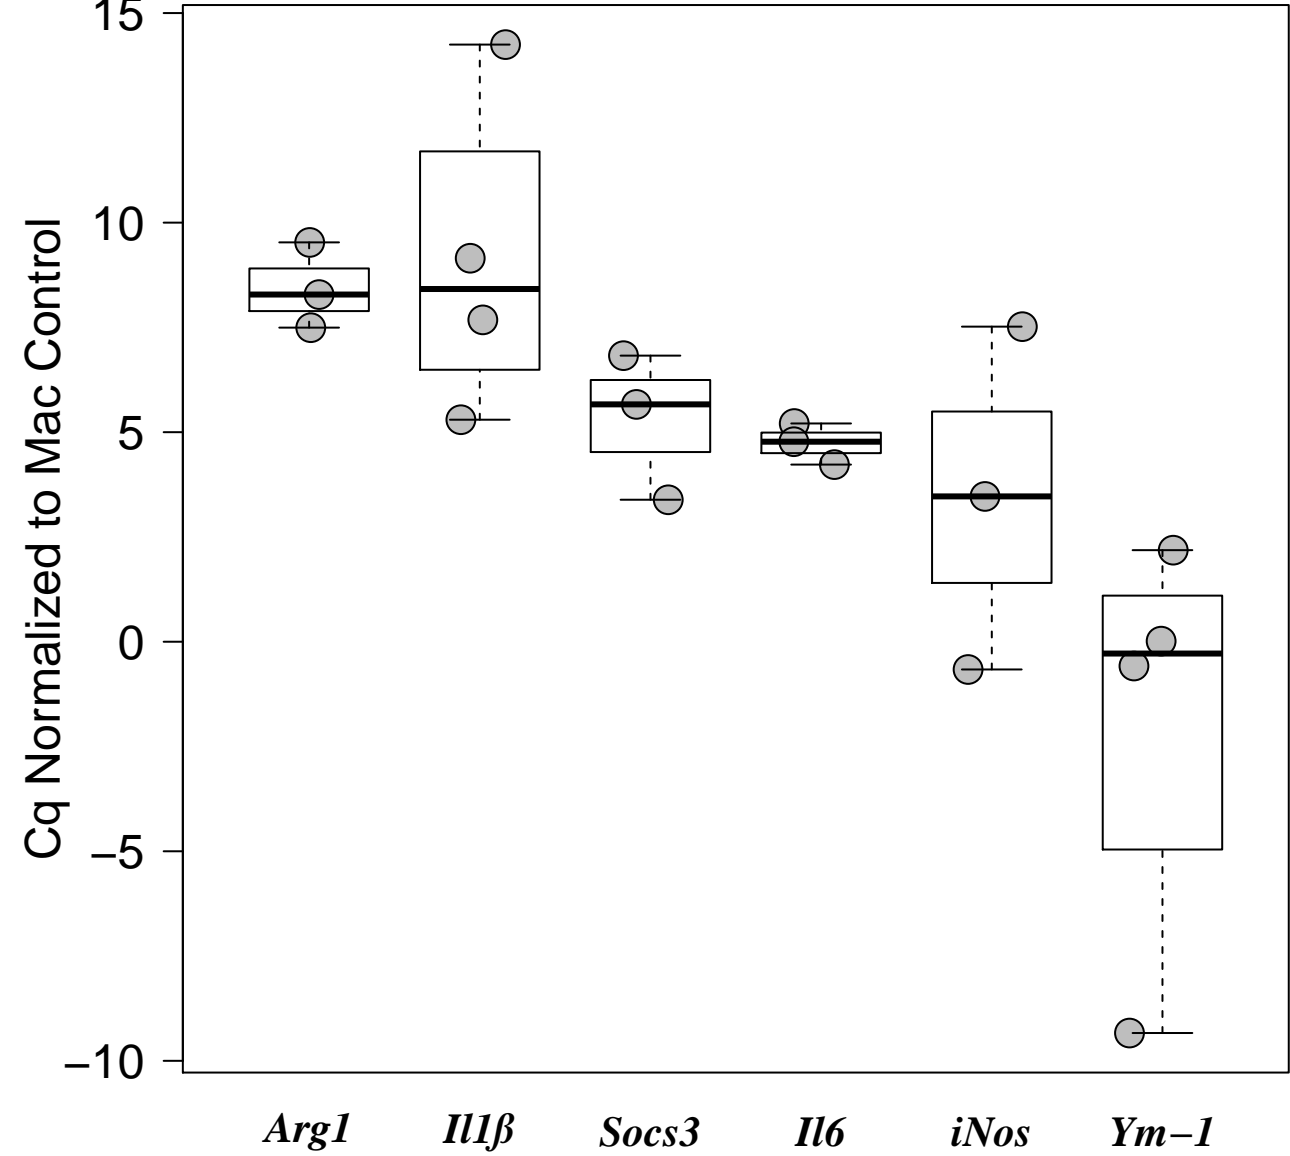



HCC4019 (Arg1 SD = 5)

HCC4054 (Arg1 SD = 3.2)

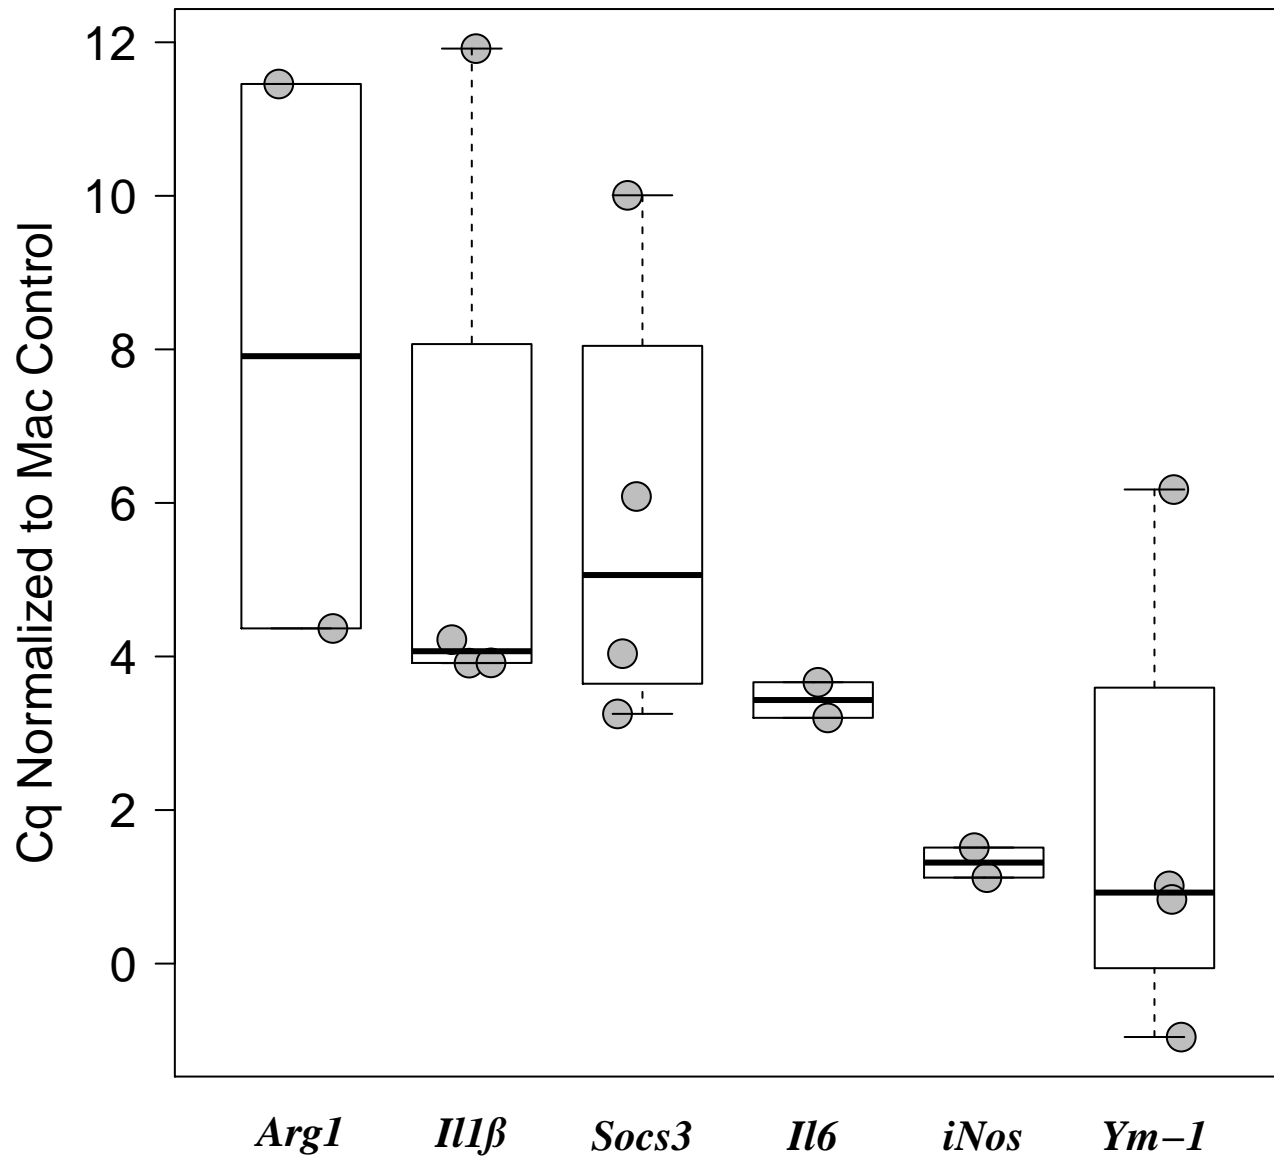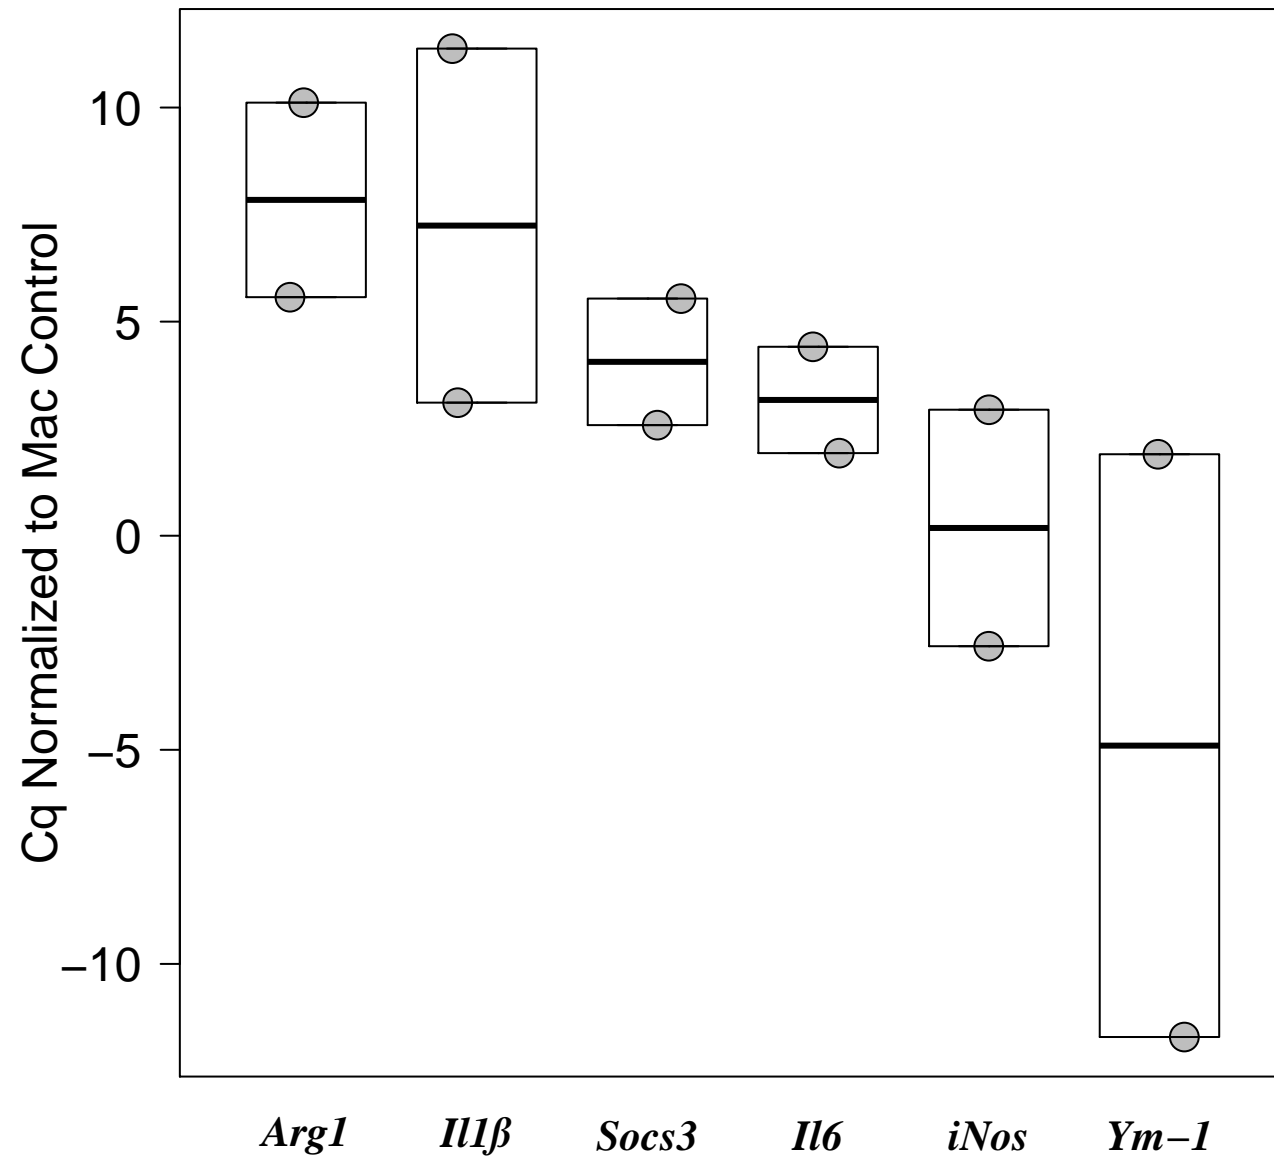

HCC4087 (Arg1 SD = 2.4)

HCC44 (Arg1 SD = 1.1)

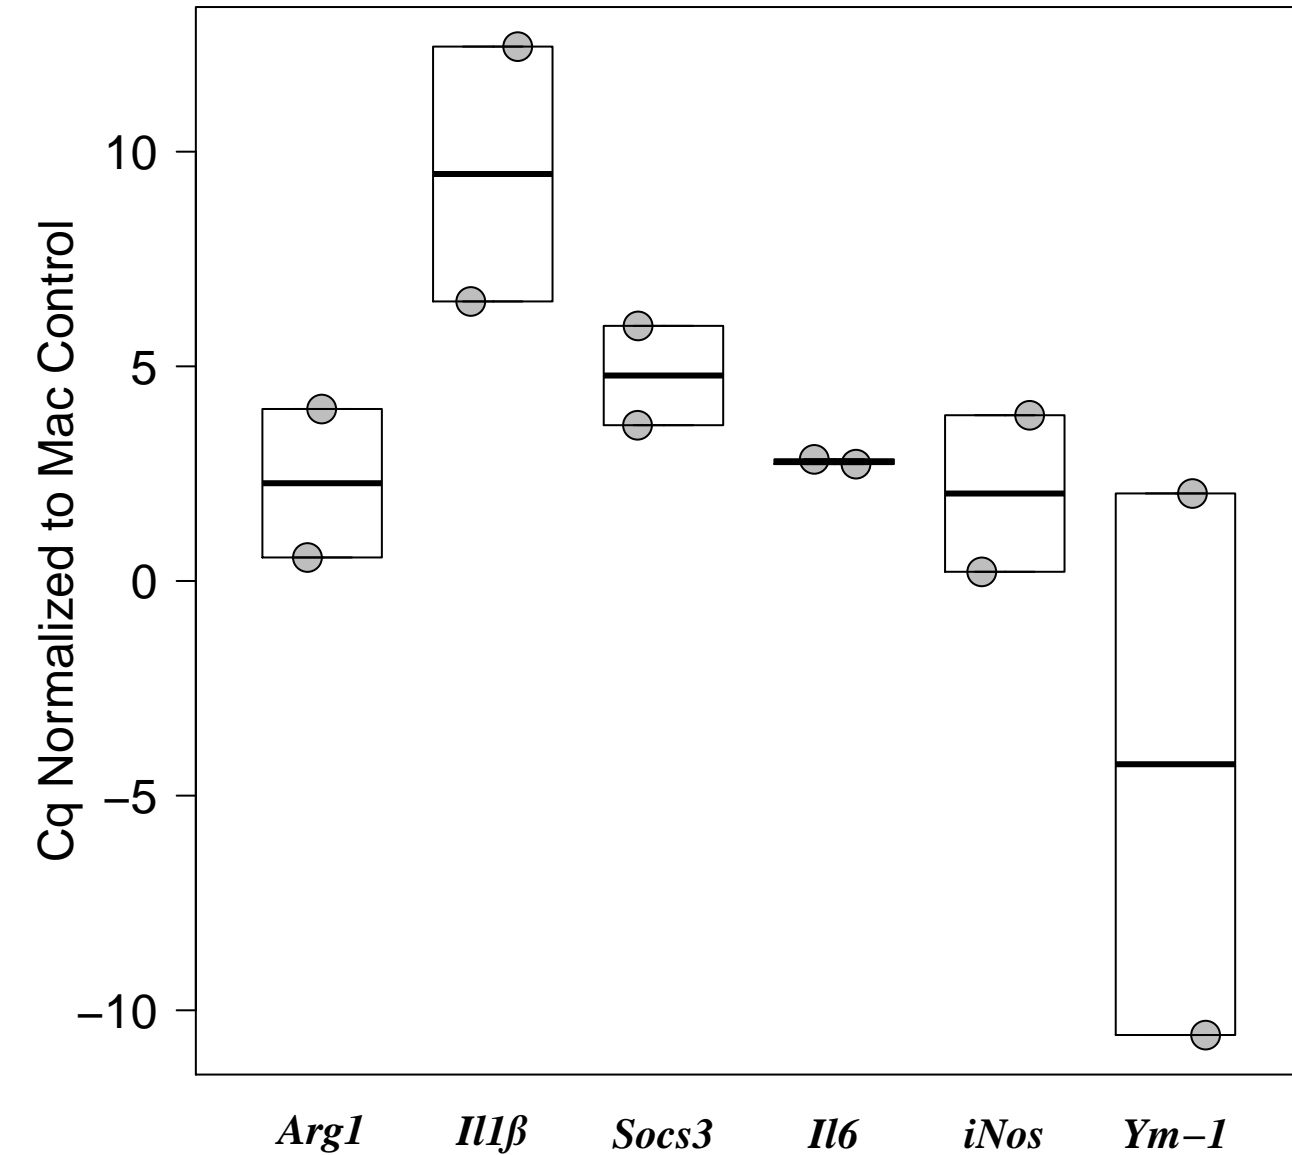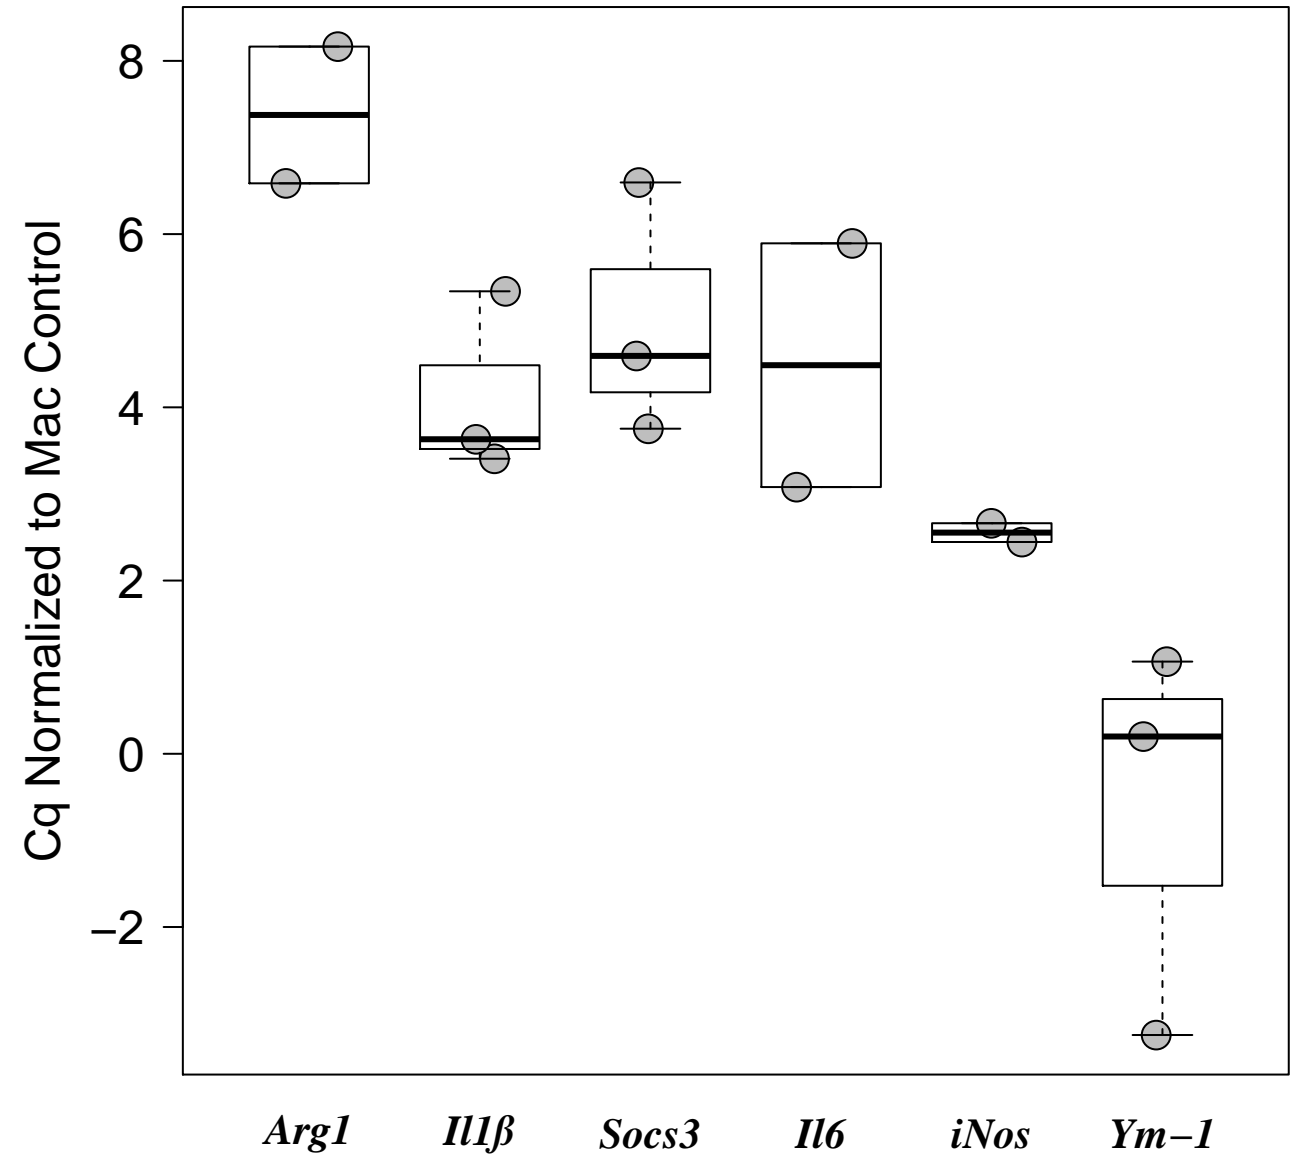

HCC446 (Arg1 SD = 4.1)

HCC461 (Arg1 SD = 1.2)

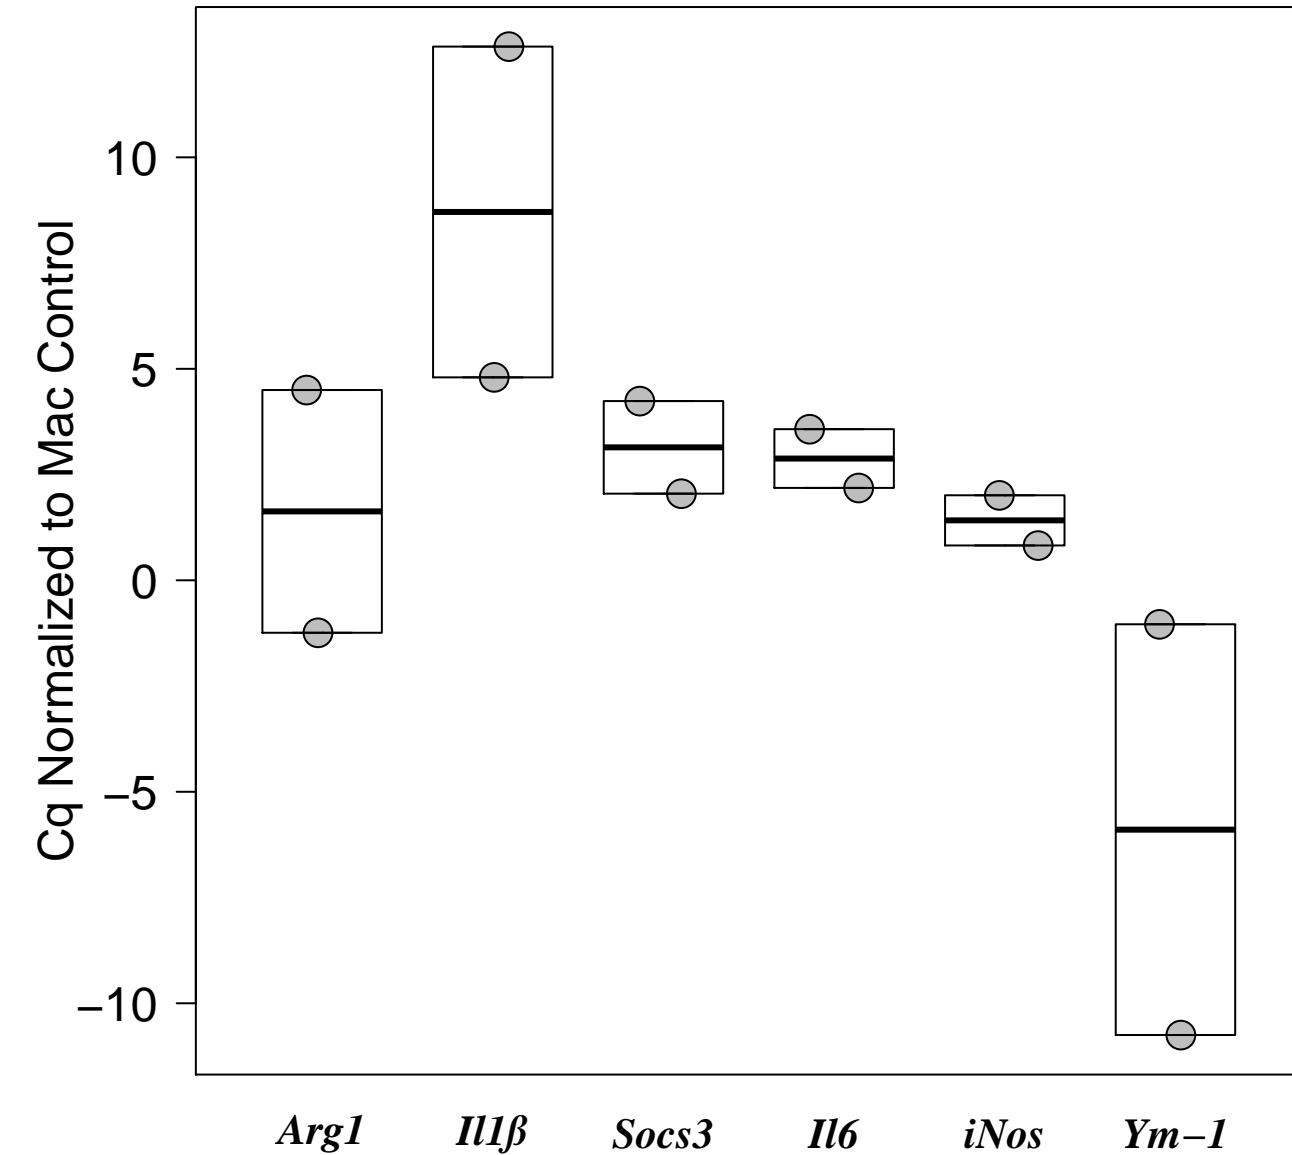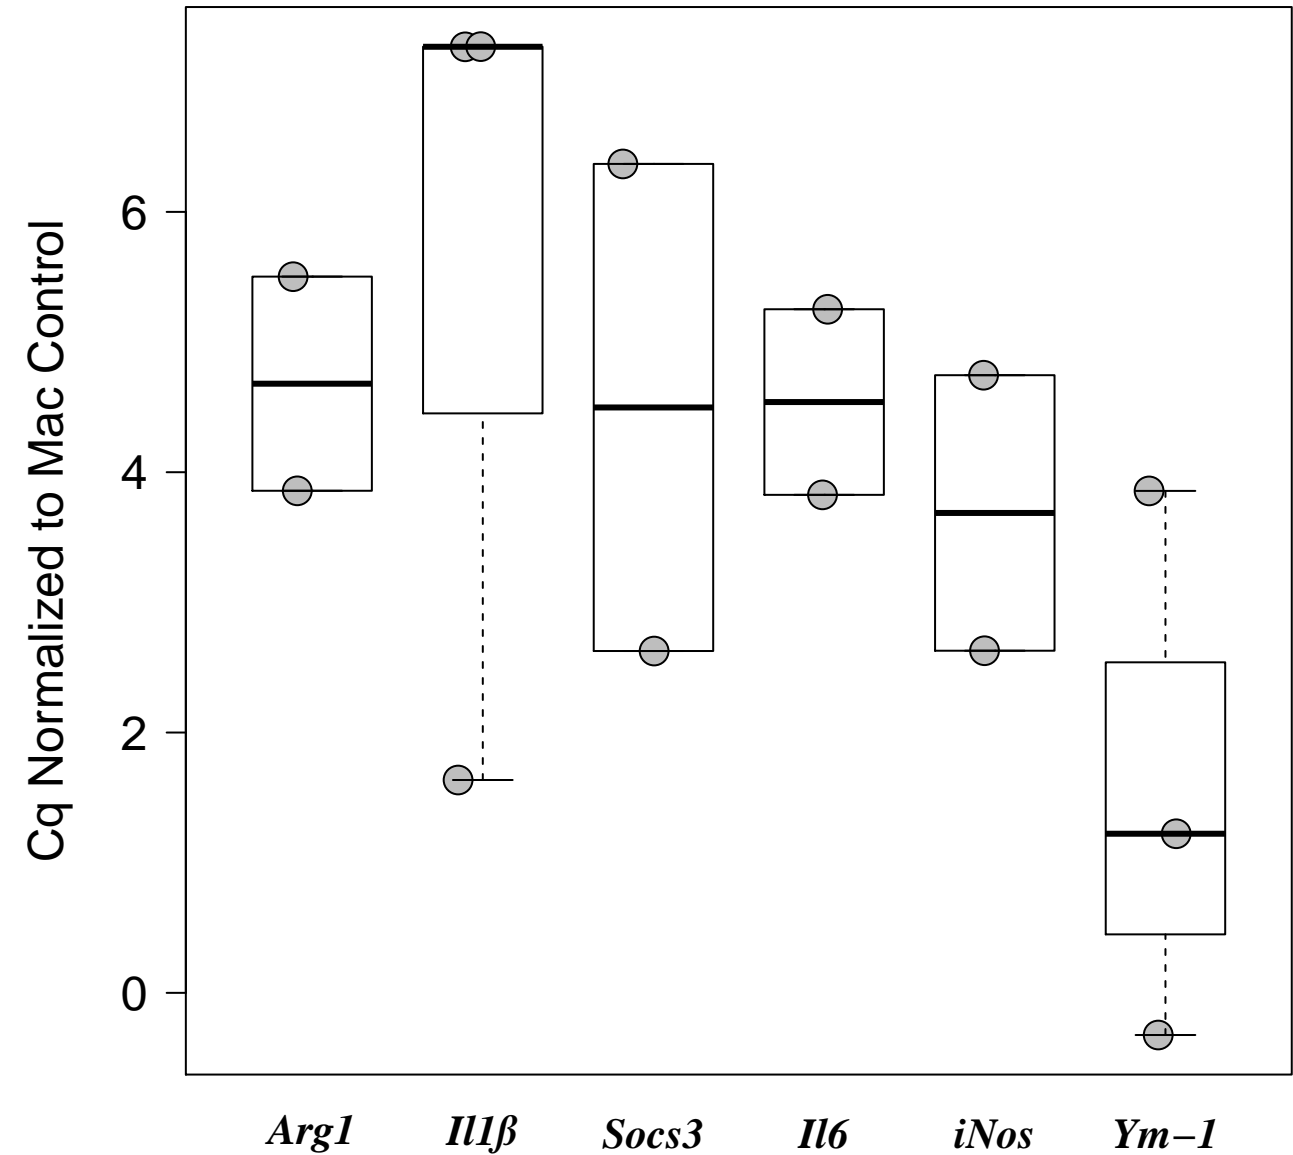

HCC515 (Arg1 SD = 0.5)

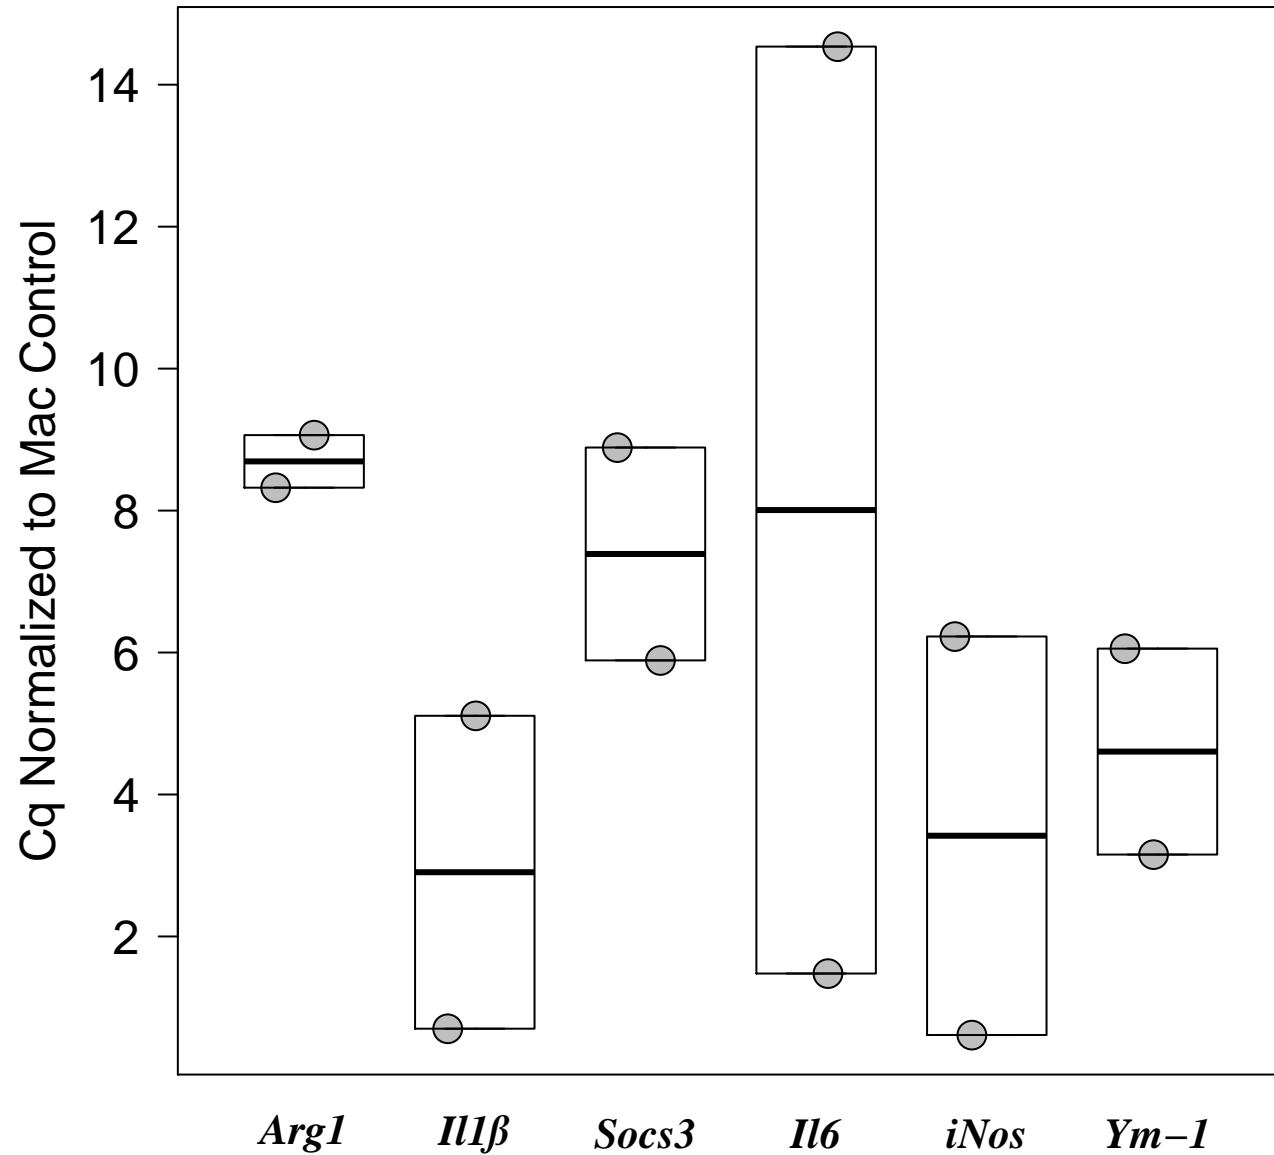

HCC78 (Arg1 SD = 5.3)

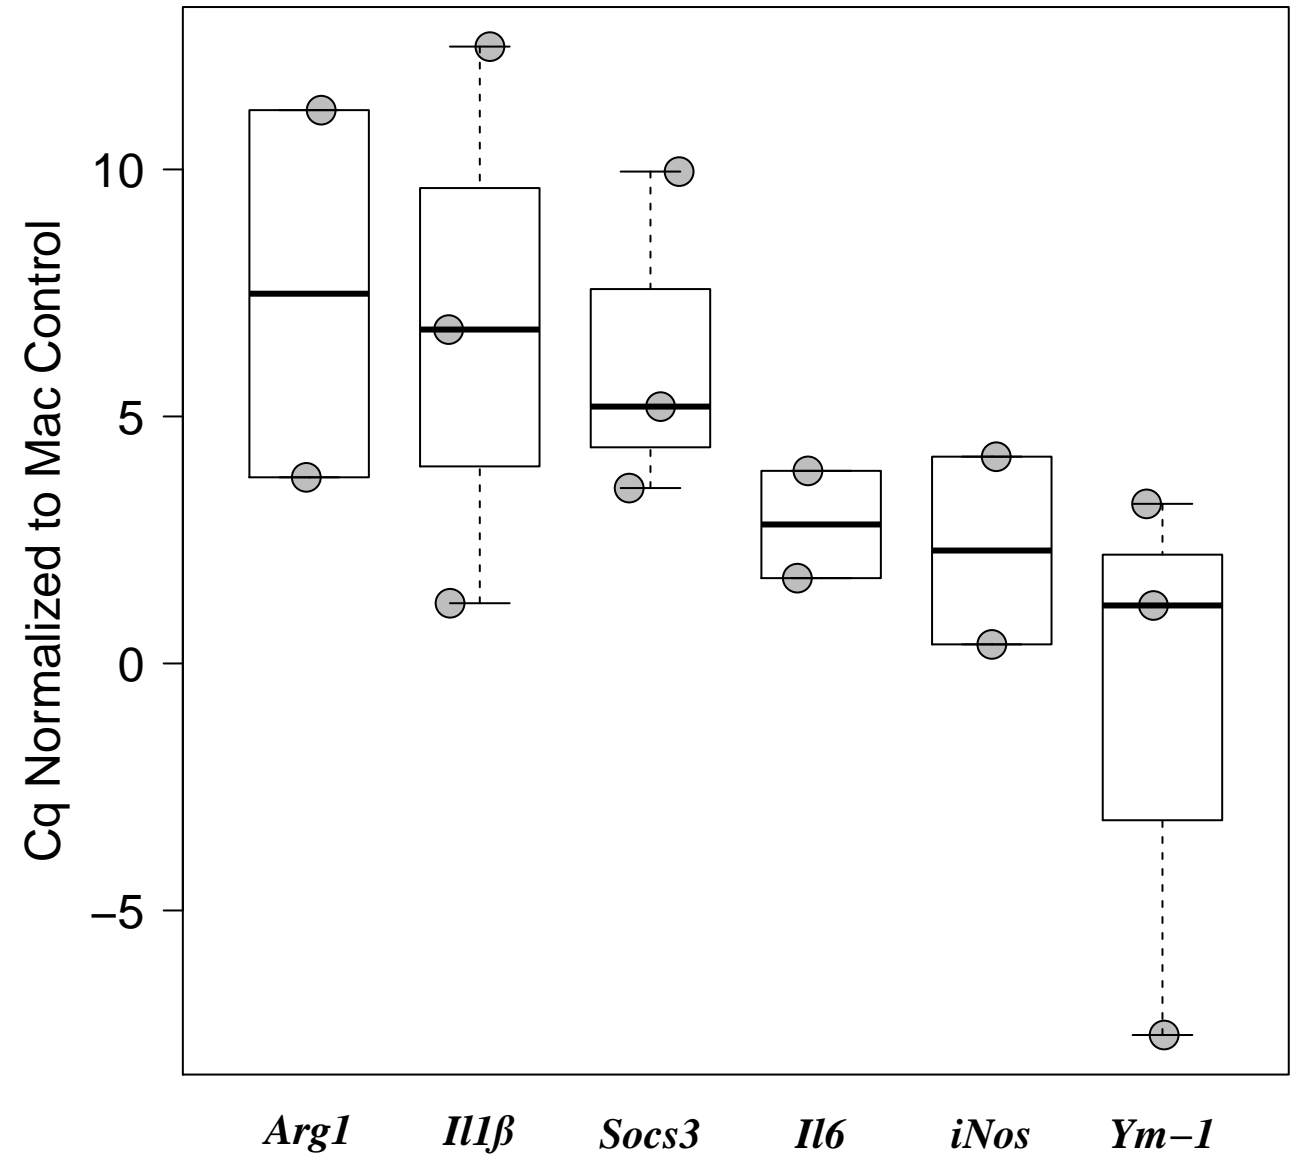

HCC827 (Arg1 SD = 2.1)

HCC95 (Arg1 SD = 0.5)

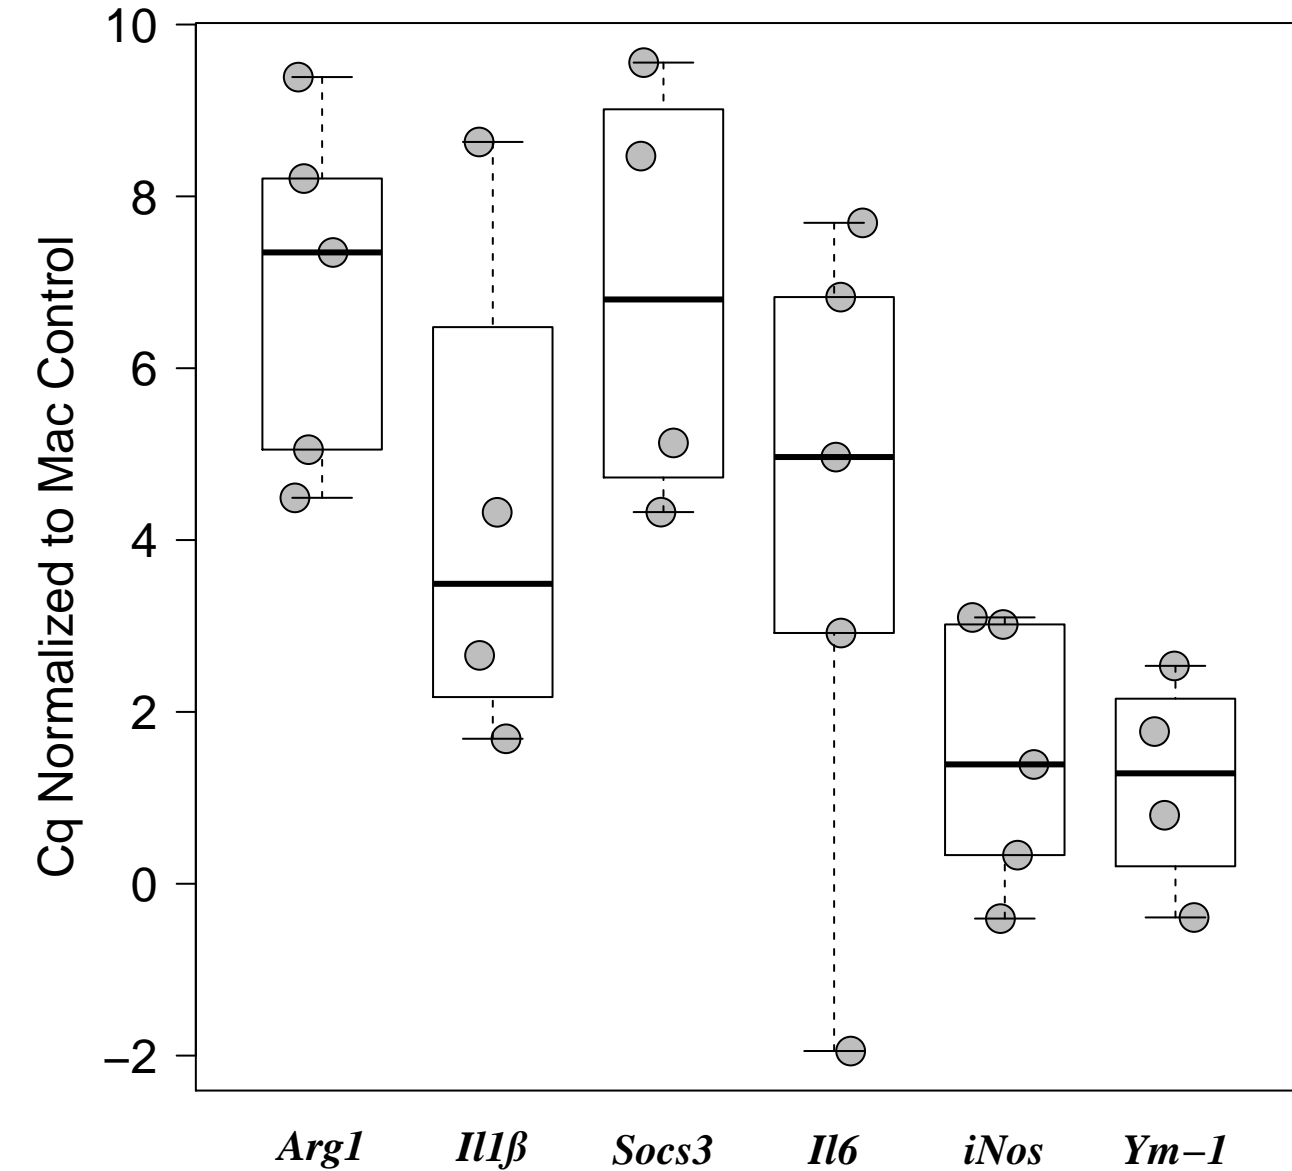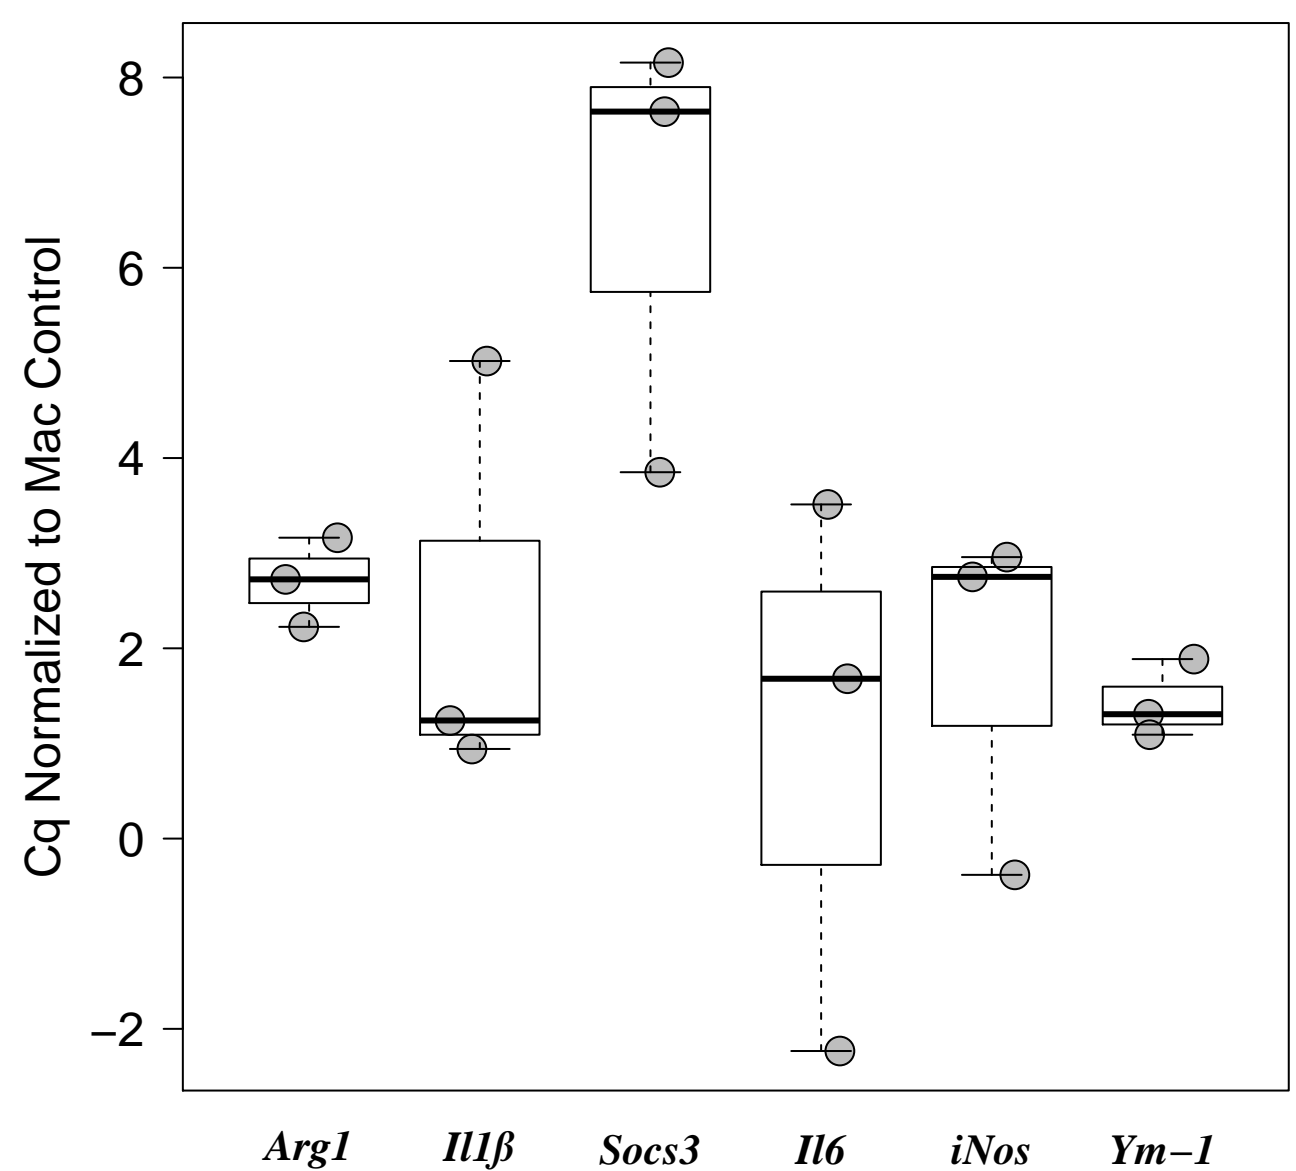

HOP-62 (Arg1 SD = 3.9)

Mac + CAF (Arg1 SD = 2.2)

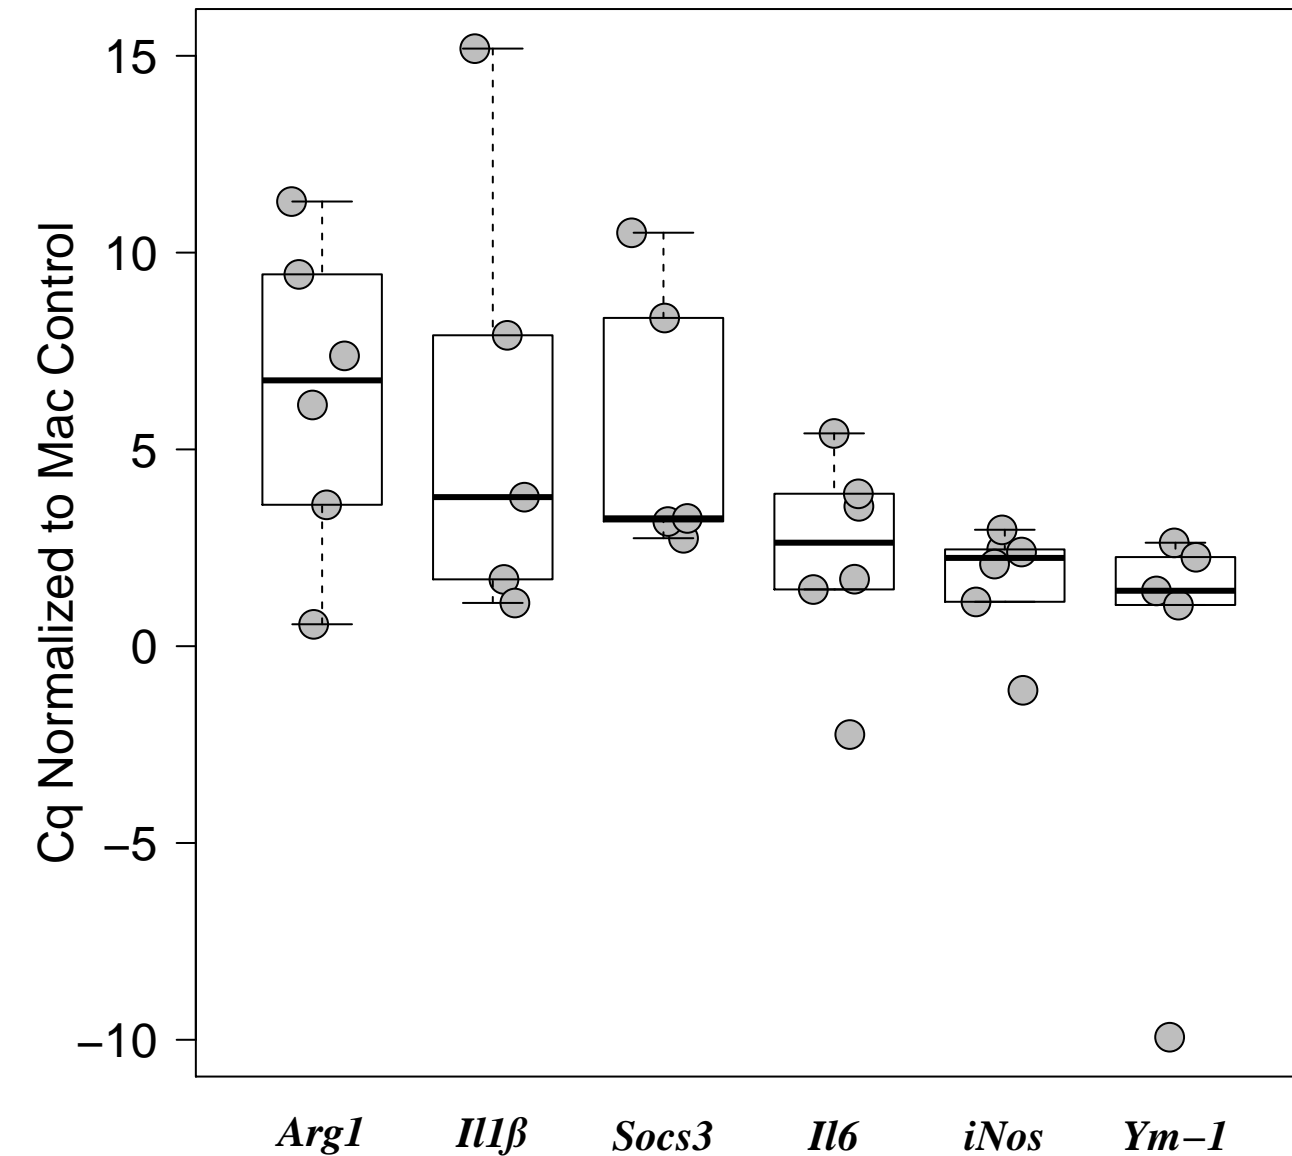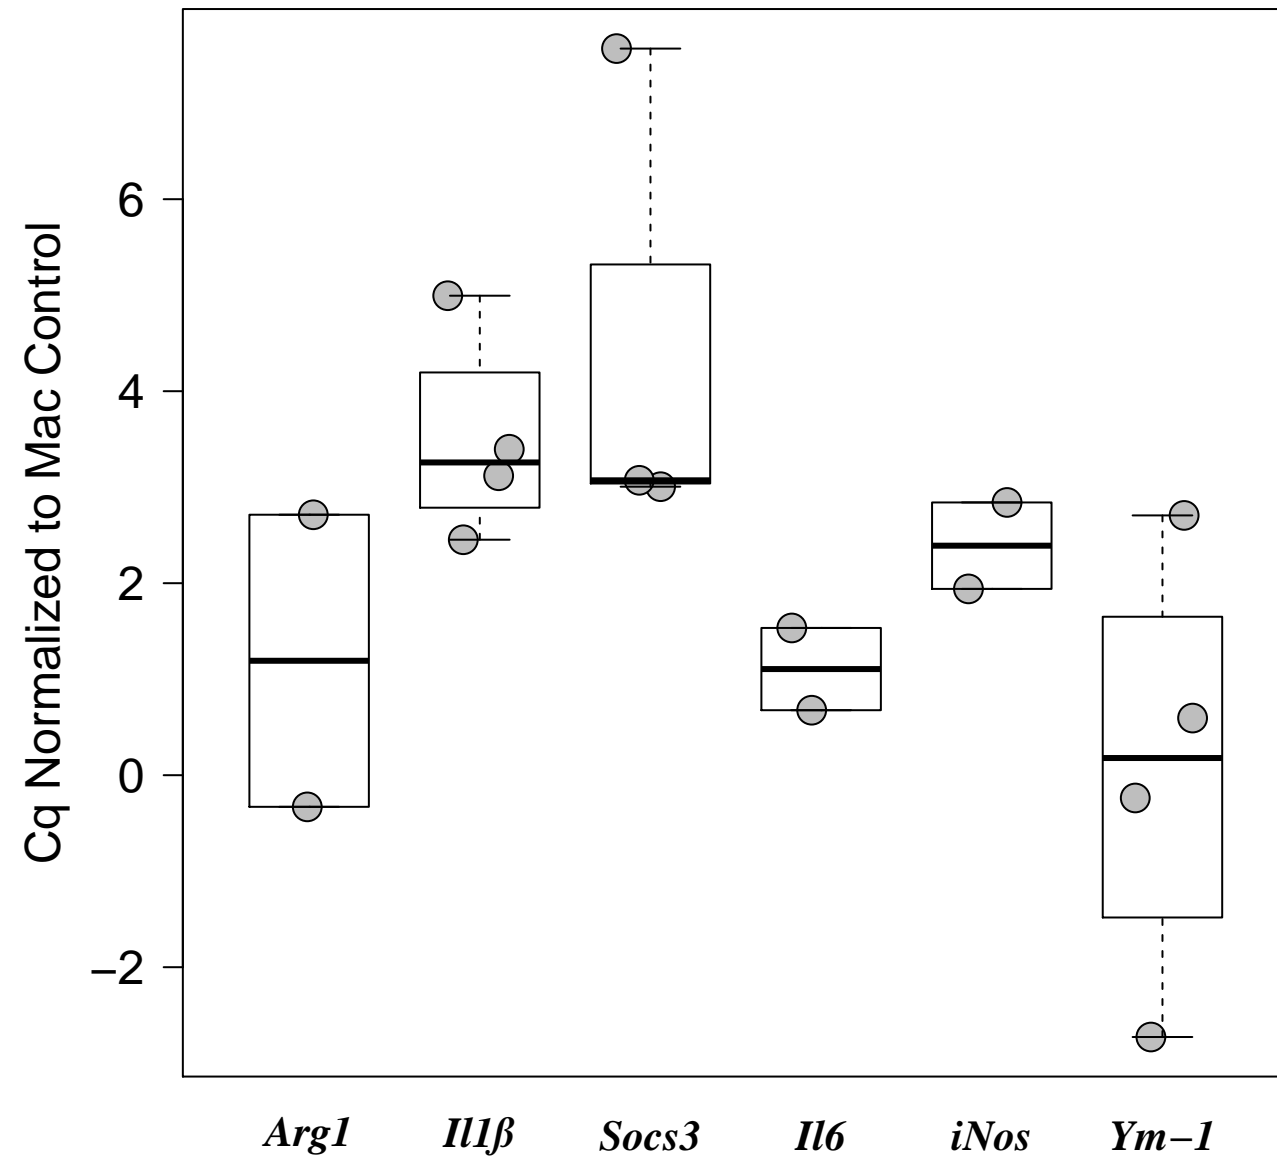

Mac + IL-4 (Arg1 SD = 2.1)

Mac + LPS (Arg1 SD = 2.1)

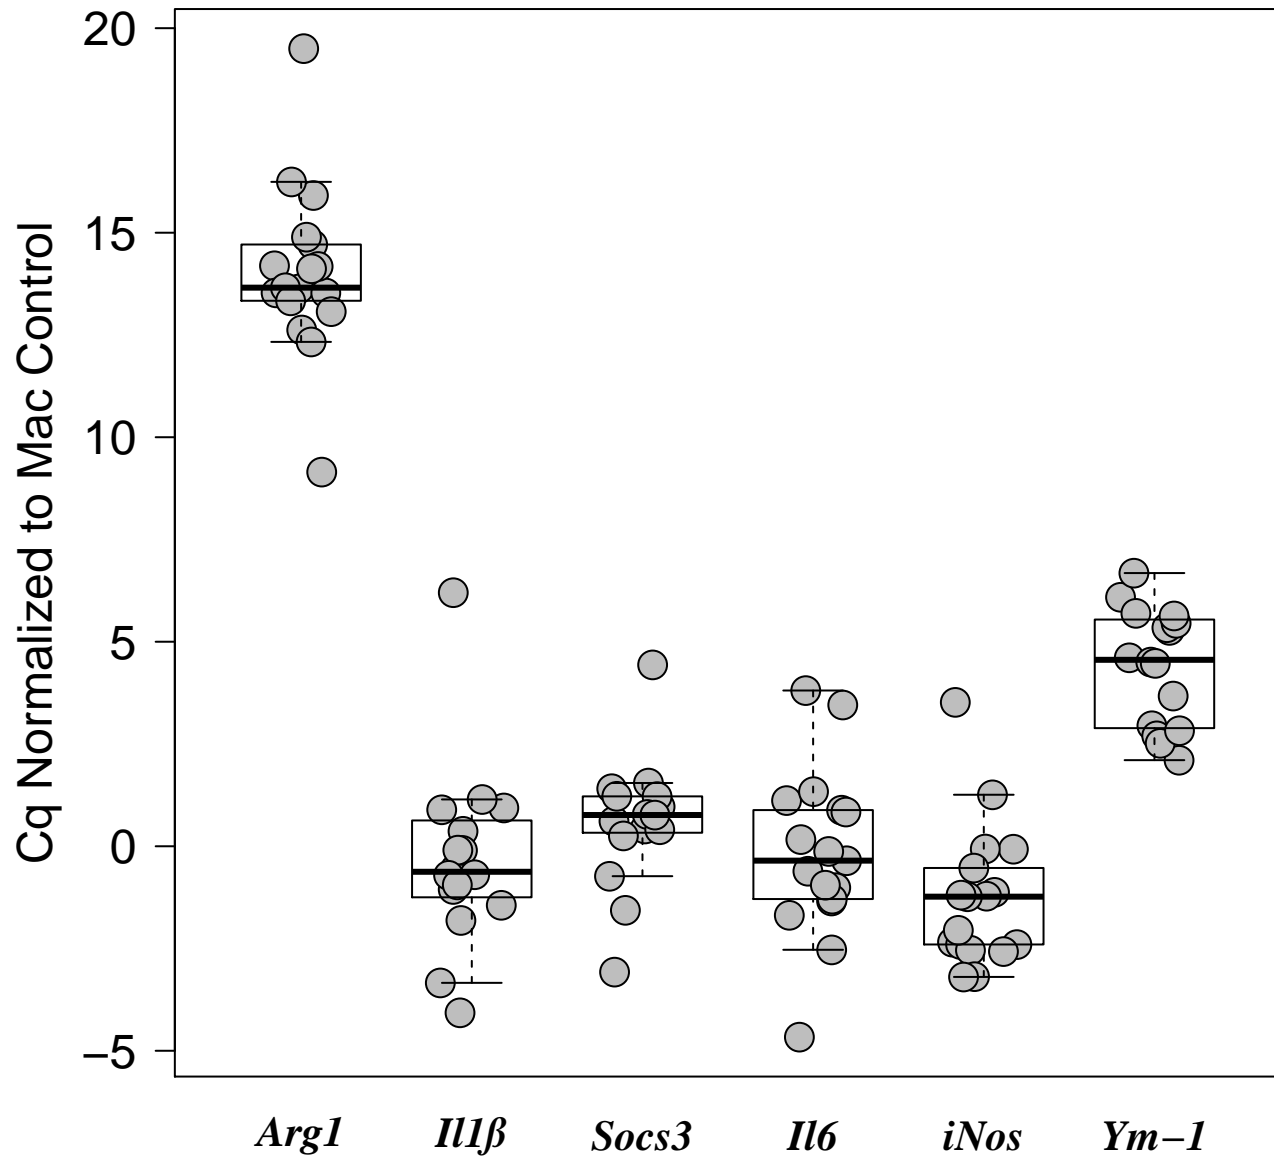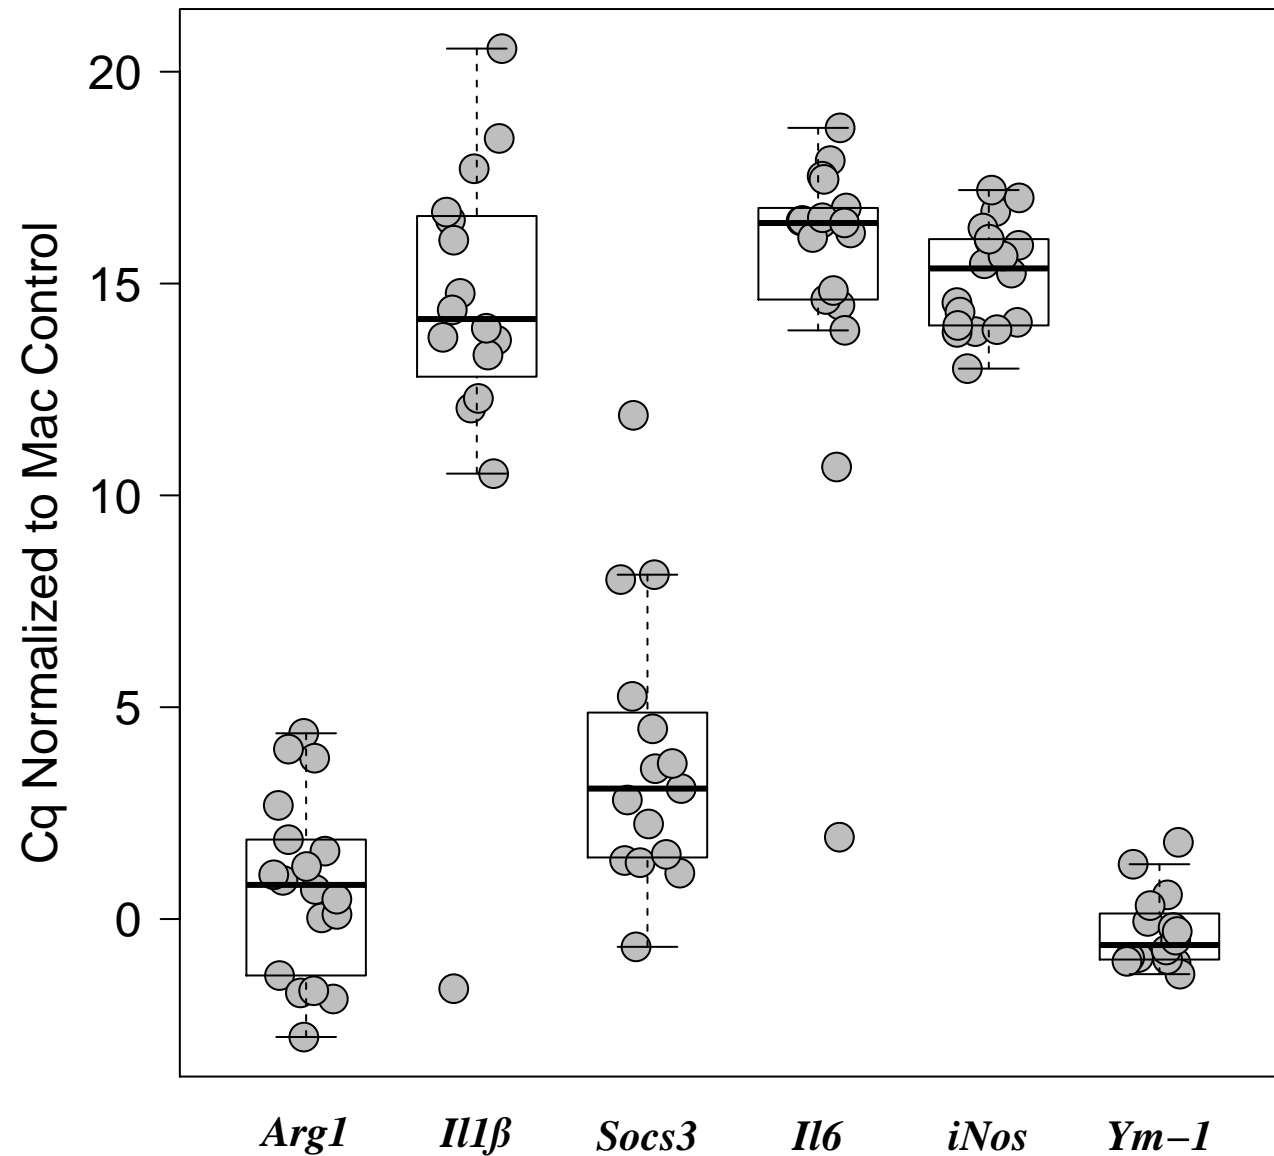

## Supplemental File 2-Co-culture qPCR Rcode.R

```
options(stringsAsFactors=F)
setwd("./Data")

dat <- read.delim("2- Co-culture qPCR raw data.txt", check.names=F)
platesort <- unique(dat[, c("Plate", "Plate_Sort")])
platesort <- platesort[order(platesort[, 2]), ]
unique(dat$Target)
sort(unique(dat$Sample))

#Exclusions
dat <- dat[!dat$Group %in% c(22,26,28,29), ]

#calculate mean and sd of technical replicates (each plate separately)
#exclude Cq values = 40 when other values are present in the mean calculation
dat.avg <- aggregate(dat$Cq, dat[c("Group", "Plate", "Target", "Sample")],
  function(d) {
    m <- mean(d[d != 40]); u <- sd(d[d != 40]); n <- length(d[d != 40])
    if (all(d == 40)) {m <- mean(d); u <- sd(d); n <- length(d)}
    cv <- (u * 100)/m
    c(m, u ,n, cv)
  }
)
n <- ncol(dat.avg)-1
dat.avg <- cbind(dat.avg[1:n], do.call(data.frame,dat.avg[n+1]))
dim(dat.avg)
colnames(dat.avg)[(n+1):(n+4)] <- c("Mean", "SD", "n", "CV")
dat.avg <- dat.avg[order(match(dat.avg$Plate, platesort[, 1]), dat.avg$Sample), ]

#Exclude data when actin Cq values are large
```



## Supplemental File 2-Co-culture qPCR Rcode.R

```
dat.avg.act <- dat.avg[dat.avg$Target == "Actin", ]
cut.dat.25 <- dat.avg.act[dat.avg.act$Mean >= 25, ]

#subtract Actin

dat.act <- dat.avg[dat.avg$Target == "Actin", 1:(n+1)]
dat.act2 <- merge(dat.avg[, 1:(n+1)], dat.act, by=c("Group", "Plate", "Sample"), all.x=T)
dat.act2 <- dat.act2[order(dat.act2$Group, match(dat.act2$Plate, platesort[, 1]),
  dat.act2$Sample, dat.act2$Target.x), ]
dat.act2$Mean.x <- dat.act2$Mean.x - dat.act2$Mean.y
dat.act2 <- dat.act2[dat.act2$Target.x != "Actin", 1:(n+1)]
colnames(dat.act2)[n:(n+1)] <- c("Target", "Mean")
dat.act2 <- dat.act2[!is.na(dat.act2$Mean), ]

#Remove Actin >=25
dat.act2.25 <- dat.act2[!paste(dat.act2$Group, dat.act2$Plate, dat.act2$Sample, sep="_")
  %in% paste(cut.dat.25$Group, cut.dat.25$Plate, cut.dat.25$Sample, sep="_"), ]
dat.act2 <- dat.act2.25

#take the median of duplicates within groups

dat.act3 <- aggregate(dat.act2$Mean, dat.act2[c("Group", "Target", "Sample")], median, na.rm=T)
colnames(dat.act3)[4] <- "Median"
dat.act3 <- dat.act3[order(dat.act3$Group, dat.act3$Sample, dat.act3$Target), ]

#subtract Mac control
dat.mac <- dat.act3[dat.act3$Sample == "Mac",]
dat.mac2 <- merge(dat.act3, dat.mac, by=c("Group", "Target"), all.x=T)
dat.mac2 <- dat.mac2[order(dat.mac2$Group, dat.mac2$Sample.x, dat.mac2$Target), ]
```

## Supplemental File 2-Co-culture qPCR Rcode.R

```
dat.mac2$Median.x <- dat.mac2$Median.x - dat.mac2$Median.y
dat.mac3 <- dat.mac2[dat.mac2$Sample.x != "Mac", 1:4]
colnames(dat.mac3)[3:4] <- c("Sample", "Median")
dat.mac3 <- dat.mac3[!is.na(dat.mac3$Median), ]
any(is.na(dat.mac3$Median))

##### Box plots

allsamples <- sort(unique(dat.mac3$Sample))
alltargets <- unique(dat.mac3$Target)[c(1,2,5,3,4,6)]
ngroup <- length(unique(dat.mac3$Group))
ngroup

#Keep only samples with at least 2 replicates in each of the 3 main markers (Arg1, Il1b, and Socs3)

Excludesamples <- function(thisdat) {
  allsamples <- sort(allsamples)
  countrep <- aggregate(thisdat$Target, thisdat[c("Target", "Sample")], length)
  colnames(countrep)[3] <- "count"

  attach(countrep)
  test1 <- Sample[Target %in% c("Arg1", "Il1b", "Socs3") & count >= 2]
  detach(countrep)
  test1b <- table(test1)

  keepsamples <<- rownames(test1b)[test1b == 3]
  allsamples <<- c(keepsamples, setdiff(allsamples, keepsamples)) #excluded samples will be at the end
}

Excludesamples(dat.mac3)
```

## Supplemental File 2-Co-culture qPCR Rcode.R

```
library(greekLetters)

boxplots <- function(thisdat, title) {
  pdf(file=paste("4- ", title, ".pdf", sep=""), width=14, height=7)
  par(mfrow=c(1,2), mar=c(4,5,3,1) + 0.1)
  set.seed(1234)
  res <- list()
  for (k in 1:length(keepsamples)) {
    x <- thisdat[thisdat$Sample == allsamples[k], ]
    y <- split(x, x$Target)
    y <- y[alltargets[!is.na(match(alltargets, names(y)))]]
    yval <- lapply(y, function(d) -d$Median[!is.na(d$Median)])
    ygroup <- lapply(y, function(d) d$Group[!is.na(d$Median)])
    yleg <- sort(unique(unlist(ygroup)))
    ylim <- c(min(sapply(yval, min)), max(sapply(yval, max)))
    ybase <- ylim[1] - 0.1*(ylim[2]-ylim[1])

    stripchart(yval[[1]], at=1, ylab="", main="", cex.axis=1.5,
      bg="gray", method="jitter", jitter=0.2, vertical=T,
      pch=21, cex=2, xlim=c(0.5, 6.5), ylim=ylim, las=1, cex.main=1.2, xaxt="n")
    for (j in 2:length(yval)) {
      stripchart(yval[[j]], at=j, ylab="", main="", cex.axis=1.5,
        bg="gray", method="jitter", jitter=0.2, vertical=T,
        pch=21, cex=2, xlim=c(0.5, 6.5), ylim=ylim, las=1, cex.main=1.2, xaxt="n", add=T)
    }
    boxplot(yval, axes=F, add=T, outline=F, boxwex=0.7)
    text(1:length(yval), ybase, sub("b", greek$beta, names(yval)),
      cex=1.3, xpd=NA, font=4, family="serif")
    mtext(side=2, paste("Cq Normalized to Mac Control"), line=3, cex=1.5)
  }
}
```

## Supplemental File 2-Co-culture qPCR Rcode.R

```
arg.median <- median(yval[[1]])
arg.mean <- mean(yval[[1]])
arg.sd <- sd(yval[[1]])
title(paste(allsamples[k], " (Arg1 SD = ", round(arg.sd, 1), ")", sep=""))
res[[k]] <- c(arg.median, arg.mean, arg.sd)
names(res)[k] <- allsamples[k]
}
dev.off()

res2 <- do.call(rbind, res)
colnames(res2) <- c("Median", "Mean", "SD")
write.table(res2, paste("5- ", title, " - arginase summary.txt", sep=""),
  row.names=T, col.names=NA, sep='\t', na="")

res2
}

arg <- boxplots(dat.mac3, "Co-culture qPCR box plots")

#log fold change
dat.mac3ex <- dat.mac3[dat.mac3$Sample %in% keepsamples, ]
dat.mac3ex[, "FC"] <- 2 ^ - dat.mac3ex$Median
dat.mac3ex <- dat.mac3ex[order(dat.mac3ex$Sample, dat.mac3ex$Target), ]
write.table(dat.mac3ex, file="3- Co-culture qPCR processed data.txt", row.names=F, sep='\t', na="")

#Summarize for Heat map
dat.hm <- aggregate(dat.mac3ex$Median, dat.mac3ex[c("Target", "Sample")], function(d) -mean(d))
colnames(dat.hm)[3] <- "Mean"
write.table(dat.hm, file="7- Co-culture qPCR processed data for heatmap.txt", row.names=F, sep='\t')
```

## Supplemental File 2-Co-culture qPCR Rcode.R

```
#### Reproducibility test for Arginase
dat.arg <- dat.mac3ex[dat.mac3ex$Target == "Arg1", ]
dat.arg.mean <- aggregate(dat.arg$Median, dat.arg["Sample"], function(d) abs(mean(d)))
dat.arg.sd <- aggregate(dat.arg$Median, dat.arg["Sample"], function(d) sd(d))
dat.arg.mean.sorted <- dat.arg.mean[order(dat.arg.mean$x), ]
dat.arg.sd.sorted <- dat.arg.sd[match(dat.arg.mean.sorted[, 1], dat.arg.sd[, 1]), ]

pdf(file="6- Arginase reproducibility.pdf", width=10, height=7)
par(mar=c(4, 5, 2, 1) + 0.1)
bp <- barplot(height=dat.arg.mean.sorted[, 2], col="gray", axes=F, xaxt="n", space=0.4, cex.lab=1.5)
text(x=bp, y=rep(-1.6, length(bp)), labels=dat.arg.mean.sorted[, 1],
     srt=90, cex=0.7, xpd=T, adj=0, font=2)
axis(side=2, at=seq(0, 12, by=1), cex.axis=1.2, las=1)
mtext(side=2, "Log Abs(Mean) of Arginase", line=3, cex=1.6, font=2)
points(x=bp, y=dat.arg.sd.sorted[, 2], pch=16, col="red")
segy <- sd(dat.arg.mean.sorted[, 2])
segments(x0=bp[1], y0=segy, x1=bp[length(bp)]+0.3, y1=segy, lty=2, lwd=3, col="darkgreen")
text(x=bp[length(bp)]-21, y=segy+0.4, labels="SD of Means", cex=1.5, adj=0, font=2, col="darkgreen")
segy <- mean(dat.arg.sd.sorted[, 2])
segments(x0=bp[1], y0=segy, x1=bp[length(bp)]+0.3, y1=segy, lty=2, lwd=3, col="blue")
text(x=bp[length(bp)]-21, y=segy-0.4, labels="Mean of SDs", cex=1.5, adj=0, font=2, col="blue")
text(3, 5.3, "SD of Biol. Replicates", col="red", adj=0, font=2, cex=1.5)
text(bp[50], dat.arg.mean.sorted[50, 2]+1.5, "Mean of Biol. Replicates",
     col="black", pos=3, font=2, cex=1.5)
invisible(dev.off())

#### heatmap

#reshape dataframe to 2x2 matrix
```

## Supplemental File 2-Co-culture qPCR Rcode.R

```
library(reshape2)
dat <- acast(dat.hm, Target ~ Sample, value.var= "Mean")
ind <- !grepl("Mac", colnames(dat))
dat <- dat[, ind]
arg <- arg[ind, ]

arg <- as.data.frame(arg)
all(rownames(arg) == colnames(dat))
arg[, 4] <- round(arg[, 3] * 100 / abs(arg[, 2]))
colnames(arg)[4] <- "CV"
arg <- arg[order(arg$Mean), ]
dat <- dat[c("Ym-1", "Il6", "iNos", "Socs3", "Il1b", "Arg1"), rownames(arg)]
rownames(dat)[5] <- paste("Il1", greeks("beta"), sep="")
cvcode <- round(arg[, 4]/10)
cvcode[cvcode < 1] <- 1
cvcode[cvcode > 10] <- 10

m <- nrow(dat)
n <- ncol(dat)

#Color cutoffs are set at log values of 1, 35, 75, 350
dat2 <- dat
dat2[dat < 0] <- 1
dat2[dat > 0 & dat < 5.13] <- 2
dat2[dat > 5.13 & dat < 6.23] <- 3
dat2[dat > 6.23 & dat < 8.45] <- 4
dat2[dat > 8.45] <- 5

colramp = colorRampPalette(c("white", "skyblue1", "black"))
colramp2 = colorRampPalette(c("white", "green", "darkgreen"))
```

## Supplemental File 2-Co-culture qPCR Rcode.R

```
mypal <- colramp(5)

pdf(file="8- Co-culture qPCR heatmap with CV.pdf", width=16, height=7)
layout(matrix(c(1,2,3), ncol=1), widths=c(10), heights=c(2, 6, 2))

par(mar=c(0, 7, 8, 1) + 0.1)
plot(c(0, 100), c(0, 100), type="n", xlab="", ylab="", axes=F, xaxs="i", yaxs="i")
for (i in 1:n) {
  rect((i-1)*100/n, 5, i*100/n, 100, col=colramp2(10)[cvcode[i]], border="gray")
}
text((1:n)*100/n-50/n, 120, colnames(dat), cex=1.5, srt=90, adj=0, xpd=T, font=2)

par(mar = c(1,7,0.5,1) + 0.1)
image(1:n, 1:m, t(dat2), col=mypal, breaks=0:5, xaxt="n", yaxt="n", ann=F)
box()
abline(h=1.5:5.5, col="gray")
abline(v=1.5:(n+0.5), col="gray")
text(-4, 1:6, rownames(dat2), cex=2.5, adj=0, xpd=T, font=4, family="serif")

par(mar=c(0, 0, 0, 0) + 0.1, cex = 0.6)
plot(c(0, 100), c(0, 100), type="n", xlab="", ylab="", axes=F, xaxs="i", yaxs="i")

for (i in 1:11) {
  rect(30+2*i, 85, 32+2*i, 60, col=colramp2(11)[i], border="gray")
}
text(c(33, 53), 40, c("0", "100%"), cex=2.5, font=2)
text(43, 20, "Arg1 Coefficient of Variation", cex=2.5, adj=0.5, xpd=T, font=2)

for (i in 1:5) {
  rect(70+2*i, 85, 72+2*i, 60, col=mypal[i], border="gray")
}
```

## Supplemental File 2-Co-culture qPCR Rcode.R

```
}  
text(c(73, 81), 43, c("<1", ">350"), cex=2.5, font=2)  
text(77, 20, "Fold Change Relative to Mac Control", cex=2.5, adj=0.5, xpd=T, font=2)  
  
invisible(dev.off())
```



Supplemental File 3-Co-Culture qPCR raw data Placeholder – 529 pages  
Available on request.

Supplemental File 4-Co-Culture qPCR processed data-Placeholder – 70 pages  
Available on request.

Supplemental File 5-Co-Culture qPCR box plots - arginase summary

| "ID"      | "Median"         | "Mean"            | "SD"              |
|-----------|------------------|-------------------|-------------------|
| "A427"    | 7.872789135      | 8.56627463095833  | 2.45119501384872  |
| "A549"    | 4.886503715      | 5.21298682833333  | 1.19939467479752  |
| "Calu-1"  | 3.49788512375    | 3.16262748055555  | 1.29139573043685  |
| "Calu-6"  | 2.633613715      | 2.3752021545      | 2.45576493251576  |
| "DFCI024" | 5.582391242125   | 5.582391242125    | 2.54956692658189  |
| "EKVX"    | 6.2387723025     | 6.03848881235     | 2.09912605498238  |
| "H1048"   | 2.20833099625    | 1.42785375861111  | 2.74226254019325  |
| "H1299"   | 3.44834878499999 | 3.77578676666666  | 2.20902302091859  |
| "H1355"   | 5.115999635      | 6.25120034635     | 3.49777973173253  |
| "H1373"   | 5.7075136725     | 6.37826186583333  | 2.41035598780324  |
| "H1395"   | 2.48663845125    | 2.25807187614583  | 2.85357501173156  |
| "H1437"   | 4.536259365      | 5.8860000725      | 2.90961948646014  |
| "H1563"   | 3.144429715      | 4.18321377027083  | 3.5846481727016   |
| "H157"    | 3.23290257375    | 2.1710168715625   | 2.96320595704421  |
| "H1573"   | 4.56610006625    | 4.56610006625     | 0.495023485933245 |
| "H1650"   | 7.0945924425     | 7.0945924425      | 0.459173538054847 |
| "H1666"   | 10.97141306      | 11.4274323097083  | 2.11214711055182  |
| "H1693"   | 10.728688459625  | 10.6980849610625  | 1.38003623932787  |
| "H1703"   | 9.0506685875     | 8.14606031666666  | 1.85827007927516  |
| "H1734"   | 2.60586107375    | 1.794655868125    | 3.34069174985659  |
| "H1755"   | 1.6670369025     | 0.523471822683333 | 3.13355950465237  |
| "H1792"   | 4.8991783475     | 5.145803737375    | 2.96551099374988  |
| "H1819"   | 4.74208874675    | 3.7353272279881   | 3.30957624838524  |
| "H1944"   | 5.707236865      | 6.09656498391667  | 2.67031257497363  |
| "H1975"   | 3.0672239375     | 2.984522694       | 2.85796222607278  |
| "H1993"   | 6.2313928575     | 5.35797124897222  | 2.39705323703586  |
| "H2009"   | 7.48462348675    | 7.01884221225     | 1.66659535221469  |
| "H2030"   | 6.46715898       | 5.89510325416667  | 2.52417590619509  |

Supplemental File 5-Co-Culture qPCR box plots - arginase summary

|            |                    |                     |                   |
|------------|--------------------|---------------------|-------------------|
| "H2073"    | 4.07711723666667   | 2.71164720607407    | 3.17939517540231  |
| "H2085"    | 5.20939328125      | 5.02457658279167    | 1.04859396951254  |
| "H2086"    | -1.57802590958333  | -1.57802590958333   | 4.89895111565822  |
| "H2087"    | 1.11658361925      | 0.436961393916665   | 3.63407805584586  |
| "H2122"    | 9.85450655         | 8.80192929285       | 2.63847216137301  |
| "H2172"    | 0.0660195908749968 | -1.15191059227083   | 4.76508384670347  |
| "H2258"    | 7.008006039625     | 7.008006039625      | 0.339584601666616 |
| "H226"     | 5.906415795        | 5.906415795         | 2.50622637506918  |
| "H2291"    | 7.58801019         | 7.58801019          | 0.169963442152726 |
| "H23"      | 4.2127383825       | 4.9388480125        | 1.87182110284345  |
| "H2347"    | 2.121255650875     | 1.89976962848611    | 3.00465969795055  |
| "H2887"    | 3.7189354075       | 2.78726489809524    | 4.59057157862475  |
| "H292"     | 8.461242117125     | 7.2937195516875     | 2.5005699591281   |
| "H3255"    | 4.6278255325       | 4.802884309375      | 1.05691034478205  |
| "H358"     | 3.440409745        | 4.03363890916667    | 1.47577591336055  |
| "H441"     | 4.171752305        | 5.1185128175        | 2.17544824755269  |
| "H446"     | -2.80051485        | -2.73736611183333   | 2.91330438628356  |
| "H460"     | 4.85952653         | 5.37537965444444    | 2.67225877799095  |
| "H522"     | 7.41279707         | 7.69965618916666    | 3.10314355652069  |
| "H596"     | 9.25878053441667   | 9.18881667452083    | 1.45985035699156  |
| "H647"     | 2.9925792175       | 2.95964024166666    | 1.78711844207475  |
| "H650"     | 3.412896225        | 4.62745088653704    | 2.46015598907843  |
| "H661"     | 0.117230913749999  | 0.117230913749999   | 3.87578720310275  |
| "H820"     | 6.77734408         | 5.81629879666667    | 2.02094896925039  |
| "H838"     | 1.7983147675       | 2.56276403035       | 2.63114826602133  |
| "H920"     | 0.254659263374998  | 0.254659263374998   | 2.93502401418418  |
| "HBEC3-KT" | 11.7023598138333   | 12.0566884729444    | 3.1211208155502   |
| "HCC1171"  | 4.7664437775       | 4.55562014601666    | 1.78950830074812  |
| "HCC15"    | 0.943216436249996  | -0.0370106655555578 | 2.16595257153459  |

Supplemental File 5-Co-Culture qPCR box plots - arginase summary

|              |                   |                   |                   |
|--------------|-------------------|-------------------|-------------------|
| "HCC1833"    | 4.5599838825      | 4.358905325       | 1.45998480011808  |
| "HCC193"     | 2.2092158025      | 2.2092158025      | 2.43618003791359  |
| "HCC2108"    | 7.0241371275      | 6.2623487035      | 1.76105865457251  |
| "HCC2374"    | -1.10806712125    | -1.28346162875    | 2.64229651250909  |
| "HCC2450"    | 6.39213004175     | 6.58029657084524  | 4.14791050054547  |
| "HCC2935"    | 4.93741436        | 4.93741436        | 1.14218766385572  |
| "HCC3051"    | 8.2840410075      | 8.43602882225     | 1.02553768330606  |
| "HCC4019"    | 7.91135761625     | 7.91135761625     | 5.01429803543999  |
| "HCC4054"    | 7.8428807175      | 7.8428807175      | 3.2126490056962   |
| "HCC4087"    | 2.27729294        | 2.27729294        | 2.44576173784954  |
| "HCC44"      | 7.375750547125    | 7.375750547125    | 1.11653127311293  |
| "HCC446"     | 1.629278954375    | 1.629278954375    | 4.05805343085513  |
| "HCC461"     | 4.680021275875    | 4.680021275875    | 1.16329766381917  |
| "HCC515"     | 8.69287409416667  | 8.69287409416667  | 0.52354457490205  |
| "HCC78"      | 7.4844248775      | 7.4844248775      | 5.25509510213518  |
| "HCC827"     | 7.34775982        | 6.89772728885     | 2.08056636683438  |
| "HCC95"      | 2.7247794775      | 2.7043444975      | 0.468787403171414 |
| "HOP-62"     | 6.753995658375    | 6.40059761070833  | 3.90699076526483  |
| "Mac + CAF"  | 1.19189543        | 1.19189543        | 2.15155713108433  |
| "Mac + IL-4" | 13.65647878       | 14.0353793725098  | 2.09954211790121  |
| "Mac + LPS"  | 0.805522664541666 | 0.745936976643518 | 2.11721769494216  |

Supplemental File 6-Co-culture qPCR processed data for heatmap

| "Target" | "Sample"  | "Mean"              |
|----------|-----------|---------------------|
| "Arg1"   | "A427"    | 8.56627463095833    |
| "Il1b"   | "A427"    | 4.41959185203333    |
| "Il6"    | "A427"    | 3.20278369622024    |
| "iNos"   | "A427"    | 2.40604262283333    |
| "Socs3"  | "A427"    | 4.75992364805714    |
| "Ym-1"   | "A427"    | -0.0833046318833336 |
| "Arg1"   | "A549"    | 5.21298682833333    |
| "Il1b"   | "A549"    | 3.081318352625      |
| "Il6"    | "A549"    | 0.0641594155555592  |
| "iNos"   | "A549"    | -1.32533245277778   |
| "Socs3"  | "A549"    | 5.28445266307143    |
| "Ym-1"   | "A549"    | 1.2024971079375     |
| "Arg1"   | "Calu-1"  | 3.16262748055555    |
| "Il1b"   | "Calu-1"  | 4.55952334408333    |
| "Il6"    | "Calu-1"  | 1.36973216423611    |
| "iNos"   | "Calu-1"  | 2.442385955625      |
| "Socs3"  | "Calu-1"  | 5.8976862274256     |
| "Ym-1"   | "Calu-1"  | -0.389430916416667  |
| "Arg1"   | "Calu-6"  | 2.3752021545        |
| "Il1b"   | "Calu-6"  | 3.31937197125       |
| "Il6"    | "Calu-6"  | 2.44573999408333    |
| "iNos"   | "Calu-6"  | 3.14149553425       |
| "Socs3"  | "Calu-6"  | 6.56001324013889    |
| "Ym-1"   | "Calu-6"  | 1.03084793458333    |
| "Arg1"   | "DFCI024" | 5.582391242125      |
| "Il1b"   | "DFCI024" | 5.68890191716666    |
| "Il6"    | "DFCI024" | 2.403966815875      |
| "iNos"   | "DFCI024" | 3.87078196920834    |
| "Socs3"  | "DFCI024" | 5.083922812         |

Supplemental File 6-Co-culture qPCR processed data for heatmap

|         |           |                    |
|---------|-----------|--------------------|
| "Ym-1"  | "DFCI024" | 1.4566361455       |
| "Arg1"  | "EKVX"    | 6.03848881235      |
| "Il1b"  | "EKVX"    | 6.01030576304167   |
| "Il6"   | "EKVX"    | 2.24979777951667   |
| "iNos"  | "EKVX"    | 2.80356181485      |
| "Socs3" | "EKVX"    | 8.095577272625     |
| "Ym-1"  | "EKVX"    | 2.149244423875     |
| "Arg1"  | "H1048"   | 1.42785375861111   |
| "Il1b"  | "H1048"   | 8.457766969375     |
| "Il6"   | "H1048"   | 3.03313338493056   |
| "iNos"  | "H1048"   | 3.39674744715278   |
| "Socs3" | "H1048"   | 6.352552020625     |
| "Ym-1"  | "H1048"   | -0.566188565000001 |
| "Arg1"  | "H1299"   | 3.77578676666666   |
| "Il1b"  | "H1299"   | 4.59764440502083   |
| "Il6"   | "H1299"   | 2.79682575833333   |
| "iNos"  | "H1299"   | 3.60824983583333   |
| "Socs3" | "H1299"   | 7.44254677772916   |
| "Ym-1"  | "H1299"   | 1.83518087189583   |
| "Arg1"  | "H1355"   | 6.25120034635      |
| "Il1b"  | "H1355"   | 7.12741502751667   |
| "Il6"   | "H1355"   | 3.61178516401667   |
| "iNos"  | "H1355"   | 2.83765147185      |
| "Socs3" | "H1355"   | 4.74018952939584   |
| "Ym-1"  | "H1355"   | -1.28629696398333  |
| "Arg1"  | "H1373"   | 6.37826186583333   |
| "Il1b"  | "H1373"   | 5.83984151854167   |
| "Il6"   | "H1373"   | -0.29328634472222  |
| "iNos"  | "H1373"   | 1.55892809833334   |
| "Socs3" | "H1373"   | 6.371889235        |

Supplemental File 6-Co-culture qPCR processed data for heatmap

|         |         |                    |
|---------|---------|--------------------|
| "Ym-1"  | "H1373" | 0.835909394166666  |
| "Arg1"  | "H1395" | 2.25807187614583   |
| "Il1b"  | "H1395" | 4.24018072820833   |
| "Il6"   | "H1395" | 0.796219231614585  |
| "iNos"  | "H1395" | 1.65798161609375   |
| "Socs3" | "H1395" | 5.33971815366667   |
| "Ym-1"  | "H1395" | 1.49542705872917   |
| "Arg1"  | "H1437" | 5.8860000725       |
| "Il1b"  | "H1437" | 4.156477881        |
| "Il6"   | "H1437" | 3.22898081975      |
| "iNos"  | "H1437" | 3.2984364555119    |
| "Socs3" | "H1437" | 5.60762944979167   |
| "Ym-1"  | "H1437" | 1.4312763165       |
| "Arg1"  | "H1563" | 4.18321377027083   |
| "Il1b"  | "H1563" | 6.41279810966667   |
| "Il6"   | "H1563" | 2.82308611907292   |
| "iNos"  | "H1563" | 1.45421964136458   |
| "Socs3" | "H1563" | 4.81779046376389   |
| "Ym-1"  | "H1563" | -0.331115221444444 |
| "Arg1"  | "H157"  | 2.1710168715625    |
| "Il1b"  | "H157"  | 6.2053769075       |
| "Il6"   | "H157"  | 2.46636868932292   |
| "iNos"  | "H157"  | 2.98477495671875   |
| "Socs3" | "H157"  | 5.22300824895833   |
| "Ym-1"  | "H157"  | 1.38291425733333   |
| "Arg1"  | "H1573" | 4.56610006625      |
| "Il1b"  | "H1573" | 8.93482578764583   |
| "Il6"   | "H1573" | 4.70144276         |
| "iNos"  | "H1573" | 2.45917109125      |
| "Socs3" | "H1573" | 5.60065788825      |



Supplemental File 6-Co-culture qPCR processed data for heatmap

|         |         |                    |
|---------|---------|--------------------|
| "Ym-1"  | "H1573" | -0.245441960479167 |
| "Arg1"  | "H1650" | 7.0945924425       |
| "Il1b"  | "H1650" | 2.11019669991667   |
| "Il6"   | "H1650" | 6.56080061625      |
| "iNos"  | "H1650" | 2.21762176125      |
| "Socs3" | "H1650" | 4.51591427119643   |
| "Ym-1"  | "H1650" | 1.4070296448125    |
| "Arg1"  | "H1666" | 11.4274323097083   |
| "Il1b"  | "H1666" | 6.48898190125      |
| "Il6"   | "H1666" | 2.58501494247024   |
| "iNos"  | "H1666" | 3.82860638804167   |
| "Socs3" | "H1666" | 9.37984278058333   |
| "Ym-1"  | "H1666" | 3.29382675825      |
| "Arg1"  | "H1693" | 10.6980849610625   |
| "Il1b"  | "H1693" | 6.50707258991667   |
| "Il6"   | "H1693" | 4.1310684535625    |
| "iNos"  | "H1693" | 2.93145738064583   |
| "Socs3" | "H1693" | 7.01469536222818   |
| "Ym-1"  | "H1693" | -0.501999425152778 |
| "Arg1"  | "H1703" | 8.14606031666666   |
| "Il1b"  | "H1703" | 4.66432719916667   |
| "Il6"   | "H1703" | 6.00529122666666   |
| "iNos"  | "H1703" | 3.746620745        |
| "Socs3" | "H1703" | 5.34142972         |
| "Ym-1"  | "H1703" | 1.66330056333334   |
| "Arg1"  | "H1734" | 1.794655868125     |
| "Il1b"  | "H1734" | 5.87968928104166   |
| "Il6"   | "H1734" | 0.790013478958333  |
| "iNos"  | "H1734" | 1.482320581875     |
| "Socs3" | "H1734" | 6.05522869083334   |

Supplemental File 6-Co-culture qPCR processed data for heatmap

|         |         |                    |
|---------|---------|--------------------|
| "Ym-1"  | "H1734" | 0.490980052499999  |
| "Arg1"  | "H1755" | 0.523471822683333  |
| "Il1b"  | "H1755" | 3.134794444466667  |
| "Il6"   | "H1755" | 2.9393036966       |
| "iNos"  | "H1755" | 2.3803235851       |
| "Socs3" | "H1755" | 3.33892339577777   |
| "Ym-1"  | "H1755" | -0.219149142833334 |
| "Arg1"  | "H1792" | 5.145803737375     |
| "Il1b"  | "H1792" | 4.08362528475      |
| "Il6"   | "H1792" | 3.29830521925      |
| "iNos"  | "H1792" | 3.73805963883333   |
| "Socs3" | "H1792" | 5.01941638502778   |
| "Ym-1"  | "H1792" | 1.20863382169444   |
| "Arg1"  | "H1819" | 3.7353272279881    |
| "Il1b"  | "H1819" | 6.93827912808333   |
| "Il6"   | "H1819" | 1.86203261876191   |
| "iNos"  | "H1819" | 1.83308460078571   |
| "Socs3" | "H1819" | 7.19007811975      |
| "Ym-1"  | "H1819" | -2.65515715025     |
| "Arg1"  | "H1944" | 6.09656498391667   |
| "Il1b"  | "H1944" | 4.02614449880556   |
| "Il6"   | "H1944" | 2.38383385030556   |
| "iNos"  | "H1944" | 1.54640858113889   |
| "Socs3" | "H1944" | 2.93621938134524   |
| "Ym-1"  | "H1944" | 2.15745001116667   |
| "Arg1"  | "H1975" | 2.984522694        |
| "Il1b"  | "H1975" | 4.37343361003333   |
| "Il6"   | "H1975" | 1.4765092259949    |
| "iNos"  | "H1975" | 2.93375134965476   |
| "Socs3" | "H1975" | 6.36586124705714   |

Supplemental File 6-Co-culture qPCR processed data for heatmap

|         |         |                   |
|---------|---------|-------------------|
| "Ym-1"  | "H1975" | 0.811355137616665 |
| "Arg1"  | "H1993" | 5.35797124897222  |
| "Il1b"  | "H1993" | 6.14217167238333  |
| "Il6"   | "H1993" | 1.97188305456349  |
| "iNos"  | "H1993" | 2.71173567383333  |
| "Socs3" | "H1993" | 6.10651548340714  |
| "Ym-1"  | "H1993" | 2.3347911733      |
| "Arg1"  | "H2009" | 7.01884221225     |
| "Il1b"  | "H2009" | 4.10553090697222  |
| "Il6"   | "H2009" | 7.05843389419445  |
| "iNos"  | "H2009" | 4.10018555641667  |
| "Socs3" | "H2009" | 7.86547095312302  |
| "Ym-1"  | "H2009" | 0.824700512805556 |
| "Arg1"  | "H2030" | 5.89510325416667  |
| "Il1b"  | "H2030" | 4.4772810661875   |
| "Il6"   | "H2030" | 4.82650861861111  |
| "iNos"  | "H2030" | 3.330626345       |
| "Socs3" | "H2030" | 5.27544798047222  |
| "Ym-1"  | "H2030" | 0.409459726395835 |
| "Arg1"  | "H2073" | 2.71164720607407  |
| "Il1b"  | "H2073" | 2.26094659929167  |
| "Il6"   | "H2073" | 0.785780052718255 |
| "iNos"  | "H2073" | 1.63702367536111  |
| "Socs3" | "H2073" | 3.72982156494643  |
| "Ym-1"  | "H2073" | 0.882723156062502 |
| "Arg1"  | "H2085" | 5.02457658279167  |
| "Il1b"  | "H2085" | 4.66818682327778  |
| "Il6"   | "H2085" | 1.05734412668056  |
| "iNos"  | "H2085" | 1.33317706098611  |
| "Socs3" | "H2085" | 7.50020365077778  |

Supplemental File 6-Co-culture qPCR processed data for heatmap

|         |         |                   |
|---------|---------|-------------------|
| "Ym-1"  | "H2085" | 0.986584207583334 |
| "Arg1"  | "H2086" | -1.57802590958333 |
| "Il1b"  | "H2086" | 6.09138602445833  |
| "Il6"   | "H2086" | 3.00911670875     |
| "iNos"  | "H2086" | 5.0848519975      |
| "Socs3" | "H2086" | 11.310815092375   |
| "Ym-1"  | "H2086" | 0.867952273625001 |
| "Arg1"  | "H2087" | 0.436961393916665 |
| "Il1b"  | "H2087" | 6.03173311521667  |
| "Il6"   | "H2087" | 4.71917838141667  |
| "iNos"  | "H2087" | 1.46621825975     |
| "Socs3" | "H2087" | 3.89415347657381  |
| "Ym-1"  | "H2087" | -1.55423852853333 |
| "Arg1"  | "H2122" | 8.80192929285     |
| "Il1b"  | "H2122" | 7.48491327863889  |
| "Il6"   | "H2122" | 4.91218585735     |
| "iNos"  | "H2122" | 5.43678878335     |
| "Socs3" | "H2122" | 9.311626705875    |
| "Ym-1"  | "H2122" | 3.22397724725     |
| "Arg1"  | "H2172" | -1.15191059227083 |
| "Il1b"  | "H2172" | 6.36367973495833  |
| "Il6"   | "H2172" | 2.30664013929167  |
| "iNos"  | "H2172" | 2.3697835645      |
| "Socs3" | "H2172" | 5.1108979035      |
| "Ym-1"  | "H2172" | 0.628416589749999 |
| "Arg1"  | "H2258" | 7.008006039625    |
| "Il1b"  | "H2258" | 5.92614304947222  |
| "Il6"   | "H2258" | 4.77425008837501  |
| "iNos"  | "H2258" | 0.507190369625004 |
| "Socs3" | "H2258" | 8.31192344641667  |

Supplemental File 6-Co-culture qPCR processed data for heatmap

|         |         |                   |
|---------|---------|-------------------|
| "Ym-1"  | "H2258" | 2.34318012002778  |
| "Arg1"  | "H226"  | 5.906415795       |
| "Il1b"  | "H226"  | 7.64260504260417  |
| "Il6"   | "H226"  | 4.48620223791667  |
| "iNos"  | "H226"  | 1.4709970875      |
| "Socs3" | "H226"  | 7.03144931200893  |
| "Ym-1"  | "H226"  | -2.40628171520833 |
| "Arg1"  | "H2291" | 7.58801019        |
| "Il1b"  | "H2291" | 3.5119101435      |
| "Il6"   | "H2291" | 1.76600307041667  |
| "iNos"  | "H2291" | 2.05688751125     |
| "Socs3" | "H2291" | 6.24742149516667  |
| "Ym-1"  | "H2291" | 3.57082985183333  |
| "Arg1"  | "H23"   | 4.9388480125      |
| "Il1b"  | "H23"   | 3.36545506054167  |
| "Il6"   | "H23"   | 1.84099985416667  |
| "iNos"  | "H23"   | 1.26014184527778  |
| "Socs3" | "H23"   | 5.02147446807143  |
| "Ym-1"  | "H23"   | 0.7875149860625   |
| "Arg1"  | "H2347" | 1.89976962848611  |
| "Il1b"  | "H2347" | 3.33061038502778  |
| "Il6"   | "H2347" | 3.19447077980556  |
| "iNos"  | "H2347" | 2.02181038744444  |
| "Socs3" | "H2347" | 7.51922542891667  |
| "Ym-1"  | "H2347" | 0.65911682863889  |
| "Arg1"  | "H2887" | 2.78726489809524  |
| "Il1b"  | "H2887" | 5.04830543388889  |
| "Il6"   | "H2887" | 5.79500638803571  |
| "iNos"  | "H2887" | 4.42502209291667  |
| "Socs3" | "H2887" | 8.85215691444445  |

Supplemental File 6-Co-culture qPCR processed data for heatmap

|         |         |                    |
|---------|---------|--------------------|
| "Ym-1"  | "H2887" | 2.64116787166667   |
| "Arg1"  | "H292"  | 7.2937195516875    |
| "Il1b"  | "H292"  | 7.65170963546667   |
| "Il6"   | "H292"  | 3.45251031960417   |
| "iNos"  | "H292"  | 2.0203873029375    |
| "Socs3" | "H292"  | 6.308397304125     |
| "Ym-1"  | "H292"  | 0.3189846268       |
| "Arg1"  | "H3255" | 4.802884309375     |
| "Il1b"  | "H3255" | 3.282613204375     |
| "Il6"   | "H3255" | -0.279165995208333 |
| "iNos"  | "H3255" | 1.034631170625     |
| "Socs3" | "H3255" | 6.0599050125       |
| "Ym-1"  | "H3255" | 0.0735466616666653 |
| "Arg1"  | "H358"  | 4.03363890916667   |
| "Il1b"  | "H358"  | 7.12681361027777   |
| "Il6"   | "H358"  | 2.09665338027778   |
| "iNos"  | "H358"  | 2.31599327416667   |
| "Socs3" | "H358"  | 4.5563618625       |
| "Ym-1"  | "H358"  | -3.04205126333334  |
| "Arg1"  | "H441"  | 5.1185128175       |
| "Il1b"  | "H441"  | 5.79901531033333   |
| "Il6"   | "H441"  | 1.30018693366667   |
| "iNos"  | "H441"  | 2.0553550375       |
| "Socs3" | "H441"  | 7.5015074585       |
| "Ym-1"  | "H441"  | 2.6007994315       |
| "Arg1"  | "H446"  | -2.73736611183333  |
| "Il1b"  | "H446"  | 6.1669868275       |
| "Il6"   | "H446"  | 1.76771292025      |
| "iNos"  | "H446"  | 2.69433004858333   |
| "Socs3" | "H446"  | 5.61339061625      |

Supplemental File 6-Co-culture qPCR processed data for heatmap

|         |        |                    |
|---------|--------|--------------------|
| "Ym-1"  | "H446" | 2.56833934624999   |
| "Arg1"  | "H460" | 5.37537965444444   |
| "Il1b"  | "H460" | 7.22100899583333   |
| "Il6"   | "H460" | 2.64057199708333   |
| "iNos"  | "H460" | 4.11300127611111   |
| "Socs3" | "H460" | 9.5088267375       |
| "Ym-1"  | "H460" | 2.68700302375      |
| "Arg1"  | "H522" | 7.69965618916666   |
| "Il1b"  | "H522" | 4.65792843929167   |
| "Il6"   | "H522" | 2.05367289555556   |
| "iNos"  | "H522" | 0.0209363374999979 |
| "Socs3" | "H522" | 5.08480627307143   |
| "Ym-1"  | "H522" | 1.98282797653125   |
| "Arg1"  | "H596" | 9.18881667452083   |
| "Il1b"  | "H596" | 9.00173597225      |
| "Il6"   | "H596" | 3.85944991394941   |
| "iNos"  | "H596" | 4.20784458285417   |
| "Socs3" | "H596" | 8.465205143375     |
| "Ym-1"  | "H596" | 1.53555672419444   |
| "Arg1"  | "H647" | 2.95964024166666   |
| "Il1b"  | "H647" | 4.37868084728572   |
| "Il6"   | "H647" | 0.989974692916666  |
| "iNos"  | "H647" | 2.41106182402778   |
| "Socs3" | "H647" | 6.11532067145238   |
| "Ym-1"  | "H647" | 1.79107009680952   |
| "Arg1"  | "H650" | 4.62745088653704   |
| "Il1b"  | "H650" | 6.61213282233333   |
| "Il6"   | "H650" | 2.56280394656085   |
| "iNos"  | "H650" | 2.17411232940741   |
| "Socs3" | "H650" | 6.539032837        |

Supplemental File 6-Co-culture qPCR processed data for heatmap

|         |            |                    |
|---------|------------|--------------------|
| "Ym-1"  | "H650"     | 2.26427680666667   |
| "Arg1"  | "H661"     | 0.117230913749999  |
| "Il1b"  | "H661"     | 6.5754763384375    |
| "Il6"   | "H661"     | 2.6656126625       |
| "iNos"  | "H661"     | 3.18075963125      |
| "Socs3" | "H661"     | 4.64113256325893   |
| "Ym-1"  | "H661"     | -3.297997614375    |
| "Arg1"  | "H820"     | 5.81629879666667   |
| "Il1b"  | "H820"     | 3.39864836583334   |
| "Il6"   | "H820"     | -0.94438194        |
| "iNos"  | "H820"     | 0.712896323333332  |
| "Socs3" | "H820"     | 5.94223724416667   |
| "Ym-1"  | "H820"     | -0.034782398611112 |
| "Arg1"  | "H838"     | 2.56276403035      |
| "Il1b"  | "H838"     | 4.20584173495      |
| "Il6"   | "H838"     | 2.92527792251667   |
| "iNos"  | "H838"     | 1.11226219168333   |
| "Socs3" | "H838"     | 3.78963429780714   |
| "Ym-1"  | "H838"     | 1.6914461722       |
| "Arg1"  | "H920"     | 0.254659263374998  |
| "Il1b"  | "H920"     | 3.64683226947222   |
| "Il6"   | "H920"     | 2.554286368375     |
| "iNos"  | "H920"     | 1.42837390754167   |
| "Socs3" | "H920"     | 4.6762406007619    |
| "Ym-1"  | "H920"     | -0.959276204694445 |
| "Arg1"  | "HBEC3-KT" | 12.0566884729444   |
| "Il1b"  | "HBEC3-KT" | 3.98848662545833   |
| "Il6"   | "HBEC3-KT" | 3.86588109023809   |
| "iNos"  | "HBEC3-KT" | 4.45090539211111   |
| "Socs3" | "HBEC3-KT" | 7.232660352125     |



Supplemental File 6-Co-culture qPCR processed data for heatmap

|         |            |                     |
|---------|------------|---------------------|
| "Ym-1"  | "HBEC3-KT" | 4.452713255875      |
| "Arg1"  | "HCC1171"  | 4.55562014601666    |
| "Il1b"  | "HCC1171"  | 6.70530737077778    |
| "Il6"   | "HCC1171"  | 2.82489507135       |
| "iNos"  | "HCC1171"  | 4.44071480201667    |
| "Socs3" | "HCC1171"  | 2.76201216466667    |
| "Ym-1"  | "HCC1171"  | -3.958278197        |
| "Arg1"  | "HCC15"    | -0.0370106655555578 |
| "Il1b"  | "HCC15"    | 4.36485303885417    |
| "Il6"   | "HCC15"    | 2.03759436229167    |
| "iNos"  | "HCC15"    | 1.89306880909722    |
| "Socs3" | "HCC15"    | 6.5434313415625     |
| "Ym-1"  | "HCC15"    | 1.04117529947917    |
| "Arg1"  | "HCC1833"  | 4.358905325         |
| "Il1b"  | "HCC1833"  | 8.6827648715        |
| "Il6"   | "HCC1833"  | 2.38364011416667    |
| "iNos"  | "HCC1833"  | 1.389871855         |
| "Socs3" | "HCC1833"  | 7.8657033405        |
| "Ym-1"  | "HCC1833"  | 1.63420695366667    |
| "Arg1"  | "HCC193"   | 2.2092158025        |
| "Il1b"  | "HCC193"   | 6.48338363236111    |
| "Il6"   | "HCC193"   | 1.57184021625       |
| "iNos"  | "HCC193"   | 1.30068833875       |
| "Socs3" | "HCC193"   | 5.56256769625       |
| "Ym-1"  | "HCC193"   | -3.10933950875      |
| "Arg1"  | "HCC2108"  | 6.2623487035        |
| "Il1b"  | "HCC2108"  | 5.861275943         |
| "Il6"   | "HCC2108"  | 3.584574062         |
| "iNos"  | "HCC2108"  | 2.671520982         |
| "Socs3" | "HCC2108"  | 6.7488930265        |

Supplemental File 6-Co-culture qPCR processed data for heatmap

|         |           |                    |
|---------|-----------|--------------------|
| "Ym-1"  | "HCC2108" | 2.3491641905       |
| "Arg1"  | "HCC2374" | -1.28346162875     |
| "Il1b"  | "HCC2374" | 5.54841074178333   |
| "Il6"   | "HCC2374" | 1.56129854409722   |
| "iNos"  | "HCC2374" | 1.90309148465278   |
| "Socs3" | "HCC2374" | 6.80089599195      |
| "Ym-1"  | "HCC2374" | 1.02206863678333   |
| "Arg1"  | "HCC2450" | 6.58029657084524   |
| "Il1b"  | "HCC2450" | 5.26309391710417   |
| "Il6"   | "HCC2450" | 4.0800153937619    |
| "iNos"  | "HCC2450" | 4.14606852769047   |
| "Socs3" | "HCC2450" | 5.0405050254375    |
| "Ym-1"  | "HCC2450" | 0.644514521895834  |
| "Arg1"  | "HCC2935" | 4.93741436         |
| "Il1b"  | "HCC2935" | 3.667333135        |
| "Il6"   | "HCC2935" | 0.22333708         |
| "iNos"  | "HCC2935" | -0.585368171250003 |
| "Socs3" | "HCC2935" | 5.33088835583333   |
| "Ym-1"  | "HCC2935" | 0.344827865000003  |
| "Arg1"  | "HCC3051" | 8.43602882225      |
| "Il1b"  | "HCC3051" | 9.09452704808334   |
| "Il6"   | "HCC3051" | 4.73575161308333   |
| "iNos"  | "HCC3051" | 3.44115966975      |
| "Socs3" | "HCC3051" | 5.29264229522222   |
| "Ym-1"  | "HCC3051" | -1.92893303004167  |
| "Arg1"  | "HCC4019" | 7.91135761625      |
| "Il1b"  | "HCC4019" | 5.992317680125     |
| "Il6"   | "HCC4019" | 3.43296414         |
| "iNos"  | "HCC4019" | 1.31564263125      |
| "Socs3" | "HCC4019" | 5.84547639557143   |

Supplemental File 6-Co-culture qPCR processed data for heatmap

|         |           |                    |
|---------|-----------|--------------------|
| "Ym-1"  | "HCC4019" | 1.7671014023125    |
| "Arg1"  | "HCC4054" | 7.8428807175       |
| "Il1b"  | "HCC4054" | 7.24249374041667   |
| "Il6"   | "HCC4054" | 3.17101790625      |
| "iNos"  | "HCC4054" | 0.181389161666672  |
| "Socs3" | "HCC4054" | 4.06102500875      |
| "Ym-1"  | "HCC4054" | -4.90201142        |
| "Arg1"  | "HCC4087" | 2.27729294         |
| "Il1b"  | "HCC4087" | 9.47988445666667   |
| "Il6"   | "HCC4087" | 2.77806197375      |
| "iNos"  | "HCC4087" | 2.03743585500001   |
| "Socs3" | "HCC4087" | 4.7857497375       |
| "Ym-1"  | "HCC4087" | -4.2685078025      |
| "Arg1"  | "HCC44"   | 7.375750547125     |
| "Il1b"  | "HCC44"   | 4.12606478516667   |
| "Il6"   | "HCC44"   | 4.486623460875     |
| "iNos"  | "HCC44"   | 2.553608053375     |
| "Socs3" | "HCC44"   | 4.98143072992857   |
| "Ym-1"  | "HCC44"   | -0.660848309416666 |
| "Arg1"  | "HCC446"  | 1.629278954375     |
| "Il1b"  | "HCC446"  | 8.70805813541666   |
| "Il6"   | "HCC446"  | 2.878456526875     |
| "iNos"  | "HCC446"  | 1.41695432208333   |
| "Socs3" | "HCC446"  | 3.14330612104167   |
| "Ym-1"  | "HCC446"  | -5.89482852166667  |
| "Arg1"  | "HCC461"  | 4.680021275875     |
| "Il1b"  | "HCC461"  | 5.391322853        |
| "Il6"   | "HCC461"  | 4.538979609625     |
| "iNos"  | "HCC461"  | 3.686948924625     |
| "Socs3" | "HCC461"  | 4.4974136395       |

Supplemental File 6-Co-culture qPCR processed data for heatmap

|         |          |                   |
|---------|----------|-------------------|
| "Ym-1"  | "HCC461" | 1.584999668       |
| "Arg1"  | "HCC515" | 8.69287409416667  |
| "Il1b"  | "HCC515" | 2.9047774115      |
| "Il6"   | "HCC515" | 8.00742607041667  |
| "iNos"  | "HCC515" | 3.41893621791667  |
| "Socs3" | "HCC515" | 7.388798477125    |
| "Ym-1"  | "HCC515" | 4.60453319504167  |
| "Arg1"  | "HCC78"  | 7.4844248775      |
| "Il1b"  | "HCC78"  | 6.82185398852778  |
| "Il6"   | "HCC78"  | 2.81324655916667  |
| "iNos"  | "HCC78"  | 2.28627871291667  |
| "Socs3" | "HCC78"  | 6.23590012991667  |
| "Ym-1"  | "HCC78"  | -1.03855207341667 |
| "Arg1"  | "HCC827" | 6.89772728885     |
| "Il1b"  | "HCC827" | 4.32562927679167  |
| "Il6"   | "HCC827" | 4.09164684835     |
| "iNos"  | "HCC827" | 1.48710663351667  |
| "Socs3" | "HCC827" | 6.87071121033333  |
| "Ym-1"  | "HCC827" | 1.17850682679167  |
| "Arg1"  | "HCC95"  | 2.7043444975      |
| "Il1b"  | "HCC95"  | 2.40118924819445  |
| "Il6"   | "HCC95"  | 0.986567532499999 |
| "iNos"  | "HCC95"  | 1.77605545083334  |
| "Socs3" | "HCC95"  | 6.54988293069444  |
| "Ym-1"  | "HCC95"  | 1.42869930041666  |
| "Arg1"  | "HOP-62" | 6.40059761070833  |
| "Il1b"  | "HOP-62" | 5.93370276193333  |
| "Il6"   | "HOP-62" | 2.290050227375    |
| "iNos"  | "HOP-62" | 1.65235762751389  |
| "Socs3" | "HOP-62" | 5.6015720991      |

Supplemental File 6-Co-culture qPCR processed data for heatmap

|         |              |                    |
|---------|--------------|--------------------|
| "Ym-1"  | "HOP-62"     | -0.516063419066668 |
| "Arg1"  | "Mac + CAF"  | 1.19189543         |
| "Il1b"  | "Mac + CAF"  | 3.49071797504166   |
| "Il6"   | "Mac + CAF"  | 1.10537940874999   |
| "iNos"  | "Mac + CAF"  | 2.3907171925       |
| "Socs3" | "Mac + CAF"  | 4.54860593759524   |
| "Ym-1"  | "Mac + CAF"  | 0.0841456961874987 |
| "Arg1"  | "Mac + IL-4" | 14.0353793725098   |
| "Il1b"  | "Mac + IL-4" | -0.328854271874999 |
| "Il6"   | "Mac + IL-4" | -0.172502503237396 |
| "iNos"  | "Mac + IL-4" | -1.2551607755049   |
| "Socs3" | "Mac + IL-4" | 0.578390469724603  |
| "Ym-1"  | "Mac + IL-4" | 4.40884619304687   |
| "Arg1"  | "Mac + LPS"  | 0.745936976643518  |
| "Il1b"  | "Mac + LPS"  | 13.9325569624167   |
| "Il6"   | "Mac + LPS"  | 15.1916982840397   |
| "iNos"  | "Mac + LPS"  | 15.1759596396528   |
| "Socs3" | "Mac + LPS"  | 3.85272402833571   |
| "Ym-1"  | "Mac + LPS"  | -0.303370342609375 |
