# Supplementary material
Source: PubMed Central journal article supplement (PMC9529910)
Supplement: NIHMS1828736-supplement-2.pdf [file NIHMS1828736-supplement-2.pdf]

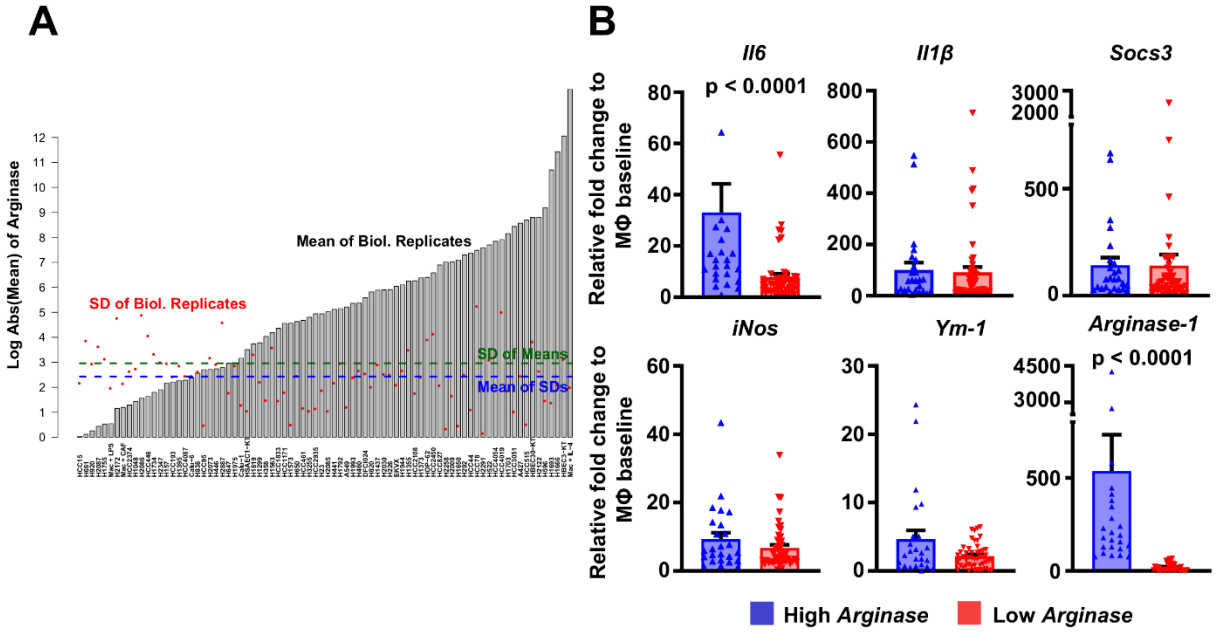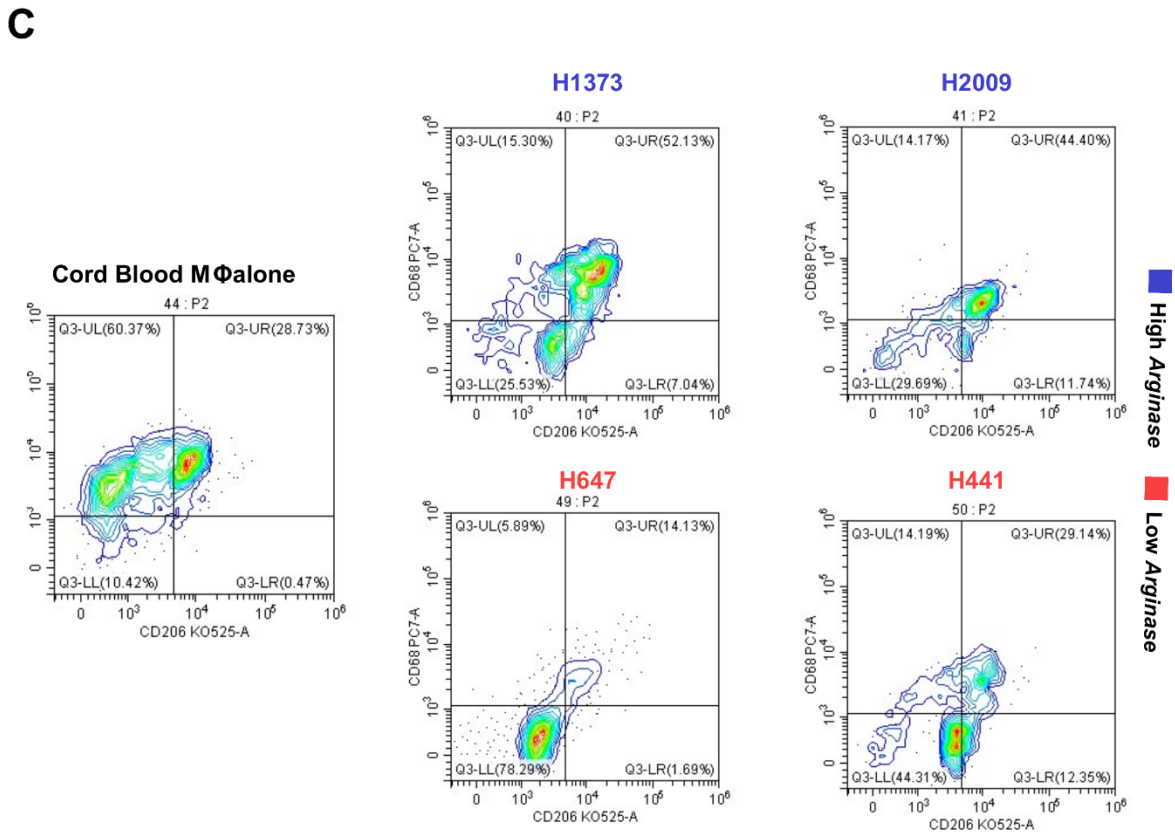

**Supplemental Figure 1: A) High expression of macrophage *Arginase-1* co-cultured with NSCLC cells is highly reproducible.** For each biologic replicate of macrophages co-cultured with lung cancer and benign immortalized cells, the mean and standard deviation of *Arginase-1* expression were calculated. Across all replicates of individual cell lines, the mean of the standard deviations was less than the standard deviation of the mean expression values, reflecting high reproducibility between replicates when compared to the overall range of expression values. Murine-specific primers were used to assess gene expression changes. Standard deviation values for individual genes across replicates for each lung cancer co-culture system is provided in **Supplemental File 1 (“Co-culture qPCR box plots”)**. **B) Quantitative expression of macrophage genes between *Arg*<sup>hi</sup> and *Arg*<sup>low</sup> cluster lines.** qRT-PCR gene expression analysis of differential expression of murine *Arginase-1*, *Socs3*, *Il1β*, *iNos*, *Il6*, *Ym-1* was compared between both cohorts. Each dot represents a test of an individual NSCLC line on co-cultured macrophage transcriptional activity. *Arg*<sup>hi</sup> cluster lines induced significantly higher levels of *Arginase-1* and *Il6*. Median expression levels were compared using Mann-Whitney U tests. NSCLC (72), SCLC (2) and benign immortalized (3) cell lines for panels A and B. **C) Induced macrophage phenotypes identified in co-cultured murine macrophages are recapitulated in co-cultured human umbilical cord blood-derived macrophages.** A panel of 2 *Arg*<sup>hi</sup> (H1373 and H2009) and 2 *Arg*<sup>low</sup> (H647 and H441) were co-cultured with cord-blood derived macrophages (2 replicates of patient-derived samples) and subsequently prepared for flow cytometric analysis. CD68 was used as a pan-macrophage marker and CD206 was utilized as an M2-like marker. Those cell lines which induced high macrophage expression of *Arginase-1* in murine macrophages similarly polarized human macrophages towards an M2-like (CD68+/CD206+) phenotype.

**A**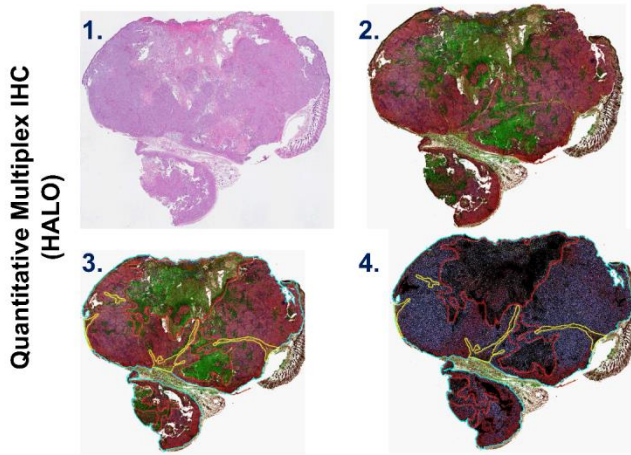**B**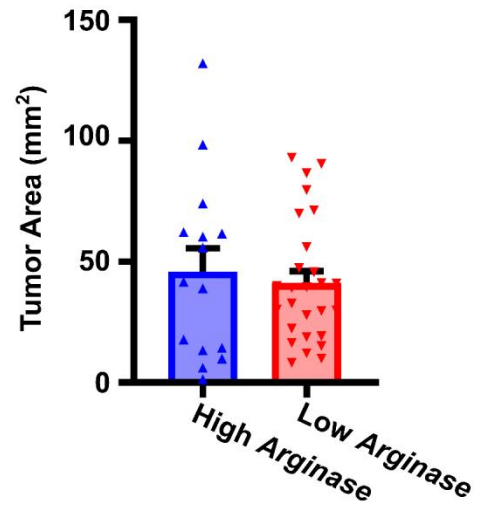**C**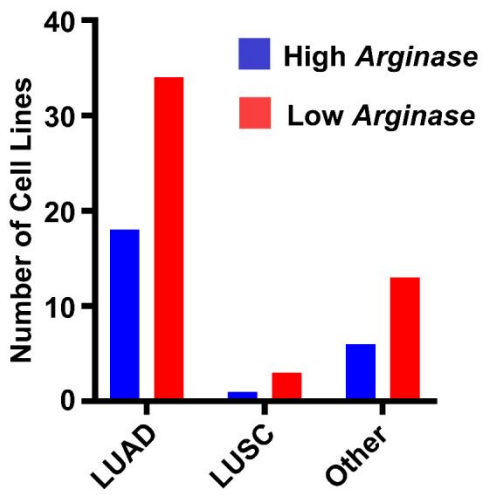**D**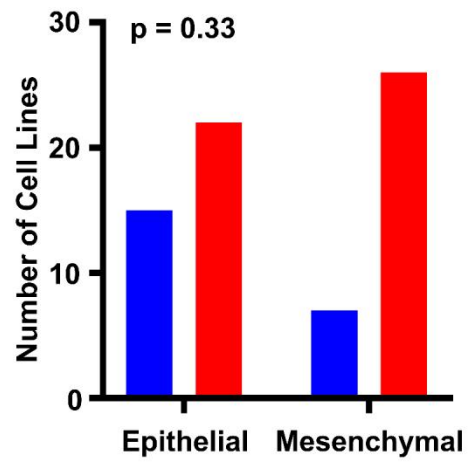**E**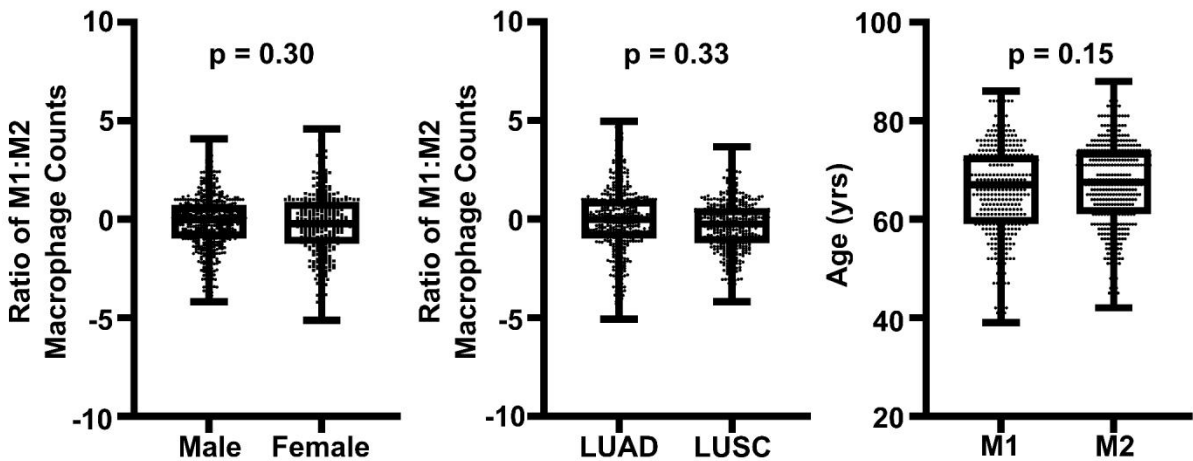

641 **Supplemental Figure 2: A) Example of pipeline used for quantitative multiplex**  
642 **immunohistochemical analysis of macrophages in nude mice xenografts.** Hematoxylin  
643 and eosin (H and E) stains of individual tumor sections were generated for each tumor to  
644 identify tumor borders, stroma, and areas of necrosis **(1)**. Sequentially stained tumor sections  
645 were inspected **(2)** and key areas identified in H and E stains were annotated **(3)**. Within the  
646 annotated tumor border, quantitative analyses of overall macrophage (F4/80+ cells) and ARG+  
647 macrophage (ARG+ / F4/80+ cells) density were performed **(4)**. **B) Comparison of tumor area.**  
648 Median tumor area between tumors established in murine xenografts was not significantly  
649 different between *Arg<sup>hi</sup>* and *Arg<sup>ow</sup>* cohorts on Mann-Whitney U analysis. NSCLC xenografts  
650 studied in Panels A and B were established from 5 *Arg<sup>hi</sup>* cluster lines (A427, H1373, H1666,  
651 H2009, H522) and 6 *Arg<sup>ow</sup>* cluster lines (H1993, Calu-6, H460, H647, H2073, H441). **C)**  
652 **Distribution of NSCLC subtype between cell line clusters.** Adenocarcinoma (LUAD),  
653 squamous cell carcinoma (LUSC), or other histologic subtypes were comprised of a mixed  
654 distribution of *Arg<sup>hi</sup>* and *Arg<sup>ow</sup>* low-cluster cell lines. **D) Distribution of EMT subtype**  
655 **classification between cell line clusters.** No significant differences were noted between the  
656 frequency of epithelial or mesenchymal phenotypes of NSCLC cells in either cohort using  
657 Fisher-exact tests. **E) Impact of sex, NSCLC subtype, and age on M1:M2 distribution in**  
658 **TCGA samples.** In TCGA-deposited clinical NSCLC tumor samples, sex, histologic subtype,  
659 and age were not significantly associated with M1:M2 ratios of macrophages characterized by  
660 CIBERSORT analysis. Mann-Whitney U tests were used for comparative analyses. Available  
661 data from a total of 980 patient lung cancer samples were used for TCGA analyses.  
662

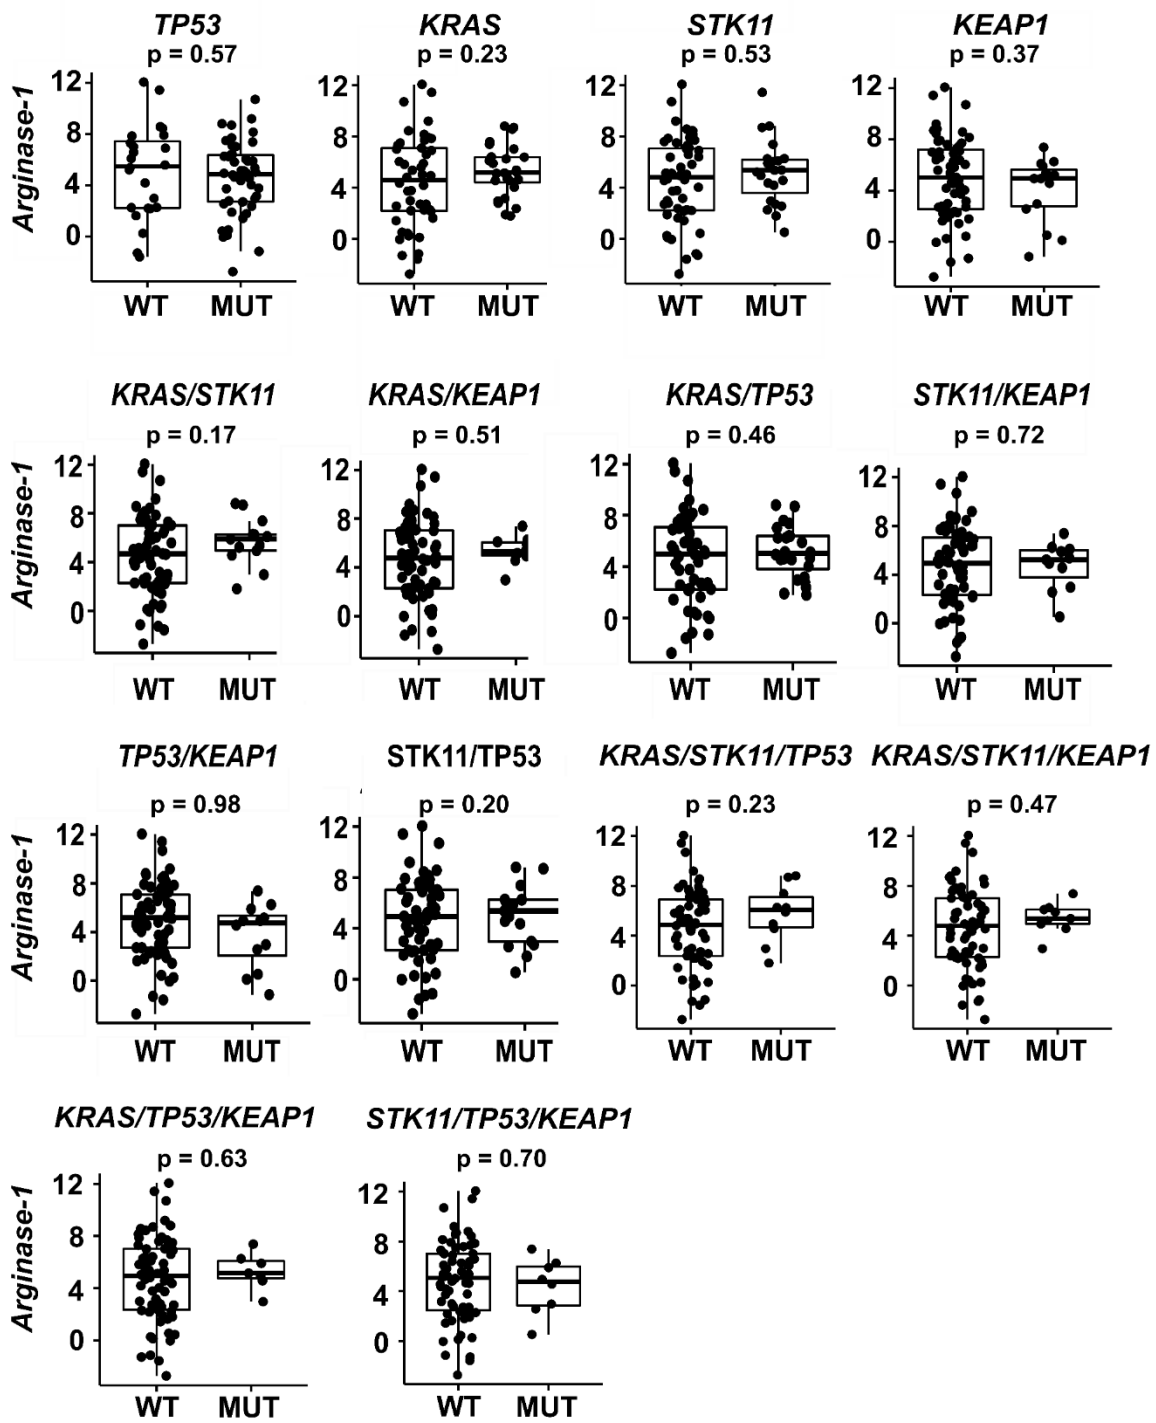

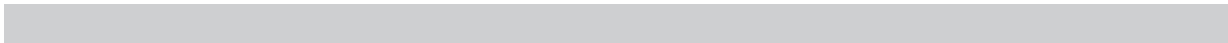

664 **Supplemental Figure 3: Impact of key driver mutations in NSCLC on quantitative**  
665 **expression of *Arginase-1* in co-cultured macrophages.** Across the most frequently mutated  
666 single or combination of oncogenes, relative expression of *Arginase-1* compared to  
667 macrophages alone was compared between wild-type and mutant status using Wilcoxon  
668 signed-rank tests. No significant associations with induced macrophage *Arginase-1* expression  
669 were observed across oncogenotypes. 72 individual NSCLC cell lines were studied.

670

671

672

673

674

675

676

677

678

679

680

681

682

683

684

685

686

687

688

689

690

691

692

693

694

695 **Supplemental Table S1:** Clinical characteristics and oncogenotypes of the 74 lung cancer lines  
 696 and 3 benign immortalized lines used in this study.

| Cell Line | Arg Status | Age | Race | Gender | Subtype             | EMT Status | Smoking | TMB  | TP53 | KRAS     | LKB1 | EGFR    | KEAP1 | Tumor Source       | Stage | Chemotherapy | Radiation | Response |
|-----------|------------|-----|------|--------|---------------------|------------|---------|------|------|----------|------|---------|-------|--------------------|-------|--------------|-----------|----------|
| A427      | High       | 52  | C    | M      | NSCLC               |            |         | 548  | WT   | Codon 12 | HD   | WT      | WT    | Primary            |       |              |           |          |
| H1355     | High       | 53  | C    | M      | ADN                 | Mes        | Y       | 589  | MUT  | Codon 13 | FS   | Other   | MUT   | Distant Metastasis | 4     | N            | N         |          |
| H1650     | High       | 27  | C    | M      | ADN                 | Epi        | Y       | 258  | MUT  | WT       | WT   | Exon 19 | WT    | Distant Metastasis | 3     | N            | N         | PD       |
| H1666     | High       | 50  | C    | F      | ADN                 | Epi        |         | 515  | WT   | WT       | FS   | WT      | WT    | Distant Metastasis | 3     | N            | Y         |          |
| H1693     | High       | 55  | C    | F      | ADN                 | Epi        | Y       | 280  | MUT  | WT       | WT   | WT      | WT    | Lymph Node         | 3     | N            | Y         | PR       |
| H1703     | High       | 56  | C    | M      | ADSQ                | Mes        | Y       | 674  | MUT  | WT       | WT   | WT      | WT    | Primary            | 1     | N            | N         |          |
| H2009     | High       | 68  | C    | F      | ADN                 | Epi        | Y       | 1196 | MUT  | Codon 12 | WT   | WT      | WT    | Lymph Node         | 4     | Y            | N         | PD       |
| H2122     | High       | 46  | C    | F      | ADN                 | Epi        | Y       | 233  | MUT  | Codon 12 | FS   | WT      | WT    | Distant Metastasis | 4     | N            | N         | PD       |
| H2258     | High       | 46  | C    | M      | ADN                 | Epi        | Y       | 97   | MUT  | WT       | WT   | WT      | WT    | Distant Metastasis | 3     | Y            | N         | PD       |
| H2291     | High       |     |      | M      | ADN                 | Epi        | N       | 701  | MUT  | Codon 12 | WT   | Other   | WT    | Lymph Node         |       | N            | N         |          |
| H292      | High       | 32  | B    | F      | MEC                 | Epi        | N       | 520  | WT   | Codon 12 | WT   | WT      | WT    | Lymph Node         | 4     | N            | N         | PD       |
| H522      | High       | 60  | C    | M      | ADN                 | Mes        | Y       | 439  | MUT  | WT       | WT   | WT      | WT    | Primary            | 2     | N            | N         | ND       |
| H596      | High       | 73  | C    | M      | ADSQ                | Epi        |         | 620  | MUT  | WT       | WT   | WT      | WT    | Primary            | 3     | N            | Y         |          |
| HBEC3-KT  | High       | 65  |      | F      | Immortalized Benign |            | Y       |      | WT   | WT       | WT   | WT      | WT    |                    |       |              |           |          |
| HBEC30-KT | High       | 62  | C    | F      | Immortalized Benign |            | Y       |      | WT   | WT       | WT   | WT      | WT    |                    |       |              |           |          |
| HCC3051   | High       | 63  | B    | M      | LCC                 | Mes        |         | 306  | MUT  | WT       | WT   | WT      | WT    |                    |       |              |           |          |
| HCC4019   | High       | 40  | C    | M      | ADN                 | Epi        | Y       | 502  | MUT  | Codon 12 | WT   | WT      | MUT   |                    | 4     |              |           |          |
| HCC4054   | High       | 73  | C    | M      | ADN                 |            |         | 280  | MUT  | Codon 12 | WT   | WT      | WT    | Primary            | 1     |              |           |          |
| HCC44     | High       | 54  | C    | F      | ADN                 | Mes        |         | 408  | MUT  | Codon 12 | FS   | WT      | MUT   | Distant Metastasis |       |              |           |          |
| HCC515    | High       | 39  | C    | F      | ADN                 | Epi        |         | 980  | MUT  | Codon 13 | SS   | WT      | MUT   | Lymph Node         |       |              |           |          |
| HCC78     | High       | 55  | C    | M      | ADN                 | Epi        |         | 260  | MUT  | Codon 12 | WT   | Other   | WT    | Distant Metastasis |       |              |           |          |
| HCC827    | High       | 38  | C    | F      | ADN                 | Epi        |         | 251  | MUT  | WT       | WT   | Exon 19 | WT    | Primary            |       |              |           |          |
| HOP-62    | High       |     |      | F      | ADN                 | Mes        |         | 708  | MUT  | Codon 12 | WT   | WT      | WT    |                    |       |              |           |          |
| H1373     | High       | 56  | B    | M      | ADN                 | Epi        | Y       | 981  | MUT  | Codon 12 | WT   | WT      | WT    | Primary            | 3     | Y            | Y         | ND       |
| HCC2108   | High       |     |      | M      | ADN                 | Mes        |         | 178  | MUT  | Other    | MS   | WT      | WT    | Lymph Node         |       |              |           |          |
| HCC2450   | High       | 52  | C    | M      | SCC                 | Epi        |         | 1926 | WT   | WT       | WT   | Other   | WT    |                    | 3     |              |           |          |
| A549      | Low        | 58  | C    | M      | ADN                 | Mes        |         | 462  | WT   | Codon 12 | NS   | WT      | MUT   | Primary            |       |              |           |          |
| H1299     | Low        | 43  | C    | M      | LCC                 | Mes        | Y       | 524  | MUT  | WT       | WT   | WT      | WT    | Lymph Node         | 3     | N            | Y         | PD       |
| H1437     | Low        | 60  | C    | M      | ADN                 | Epi        | Y       | 366  | MUT  | WT       | HD   | WT      | WT    | Distant Metastasis | 1     | N            | N         |          |
| H1563     | Low        |     |      | M      | ADN                 | Mes        |         | 763  | WT   | WT       | NS   | WT      | WT    | Primary            |       | N            | N         |          |
| H1792     | Low        | 50  | C    | M      | ADN                 | Mes        | Y       | 518  | MUT  | Codon 12 | WT   | WT      | MUT   | Distant Metastasis | 4     | N            | N         | PD       |
| H1819     | Low        | 55  | C    | F      | ADN                 | Epi        | Y       | 295  | MUT  | WT       | WT   | WT      | WT    | Lymph Node         | 3     | Y            | N         | PR       |
| H1944     | Low        | 62  | C    | F      | ADN                 | Mes        | Y       | 643  | WT   | Codon 13 | MS   | WT      | MUT   | Distant Metastasis | 3     | N            | Y         |          |
| H1993     | Low        | 47  | C    | F      | ADN                 | Epi        | Y       | 525  | MUT  | WT       | NS   | WT      | MUT   | Lymph Node         | 3     | N            | N         |          |
| H2030     | Low        |     |      | M      | ADN                 | Mes        | N       | 493  | MUT  | Codon 12 | NS   | WT      | MUT   | Lymph Node         |       | N            | N         |          |
| H2085     | Low        | 45  |      | M      | ADN                 | Epi        |         | 474  | MUT  | WT       | WT   | WT      | WT    | Primary            |       | N            | N         |          |

|         |     |    |   |   |       |     |   |      |     |          |    |         |     |                    |   |   |   |    |
|---------|-----|----|---|---|-------|-----|---|------|-----|----------|----|---------|-----|--------------------|---|---|---|----|
| H226    | Low |    |   | M | SCC M | Mes |   | 374  | WT  | WT       | WT | WT      | WT  | Distant Metastasis |   | N | N |    |
| H23     | Low | 51 | B | M | ADN   | Mes | Y | 1182 | MUT | Codon 12 | NS | WT      | MUT | Primary            |   | N | N | PD |
| H3255   | Low | 47 | C | F | ADN   | Epl | N | 322  | MUT | WT       | WT | Exon 21 | WT  |                    | 3 |   |   |    |
| H358    | Low |    | C | M | ADN   | Epl |   | 1194 | MUT | Codon 12 | WT | WT      | WT  | Primary            |   | N | N |    |
| H460    | Low |    |   | M | LCC   | Mes |   | 588  | WT  | Other    | NS | WT      | MUT | Distant Metastasis |   | N | N |    |
| H820    | Low | 53 | C | M | ADN   | Epl |   | 358  | MUT | WT       | WT | Exon 19 | WT  | Lymph Node         | 4 | Y | N | PD |
| HCC1171 | Low | 58 | C | M | NSCLC | Epl |   | 373  | MUT | Codon 12 | WT | WT      | WT  | Primary            |   |   |   |    |
| HCC2935 | Low | 39 | C | M | ADN   | Epl | N | 339  | MUT | WT       | WT | Exon 19 | MUT | Primary            |   |   |   |    |
| HCC461  | Low | 69 | C | M | ADN   | Mes |   | 164  | WT  | Codon 12 | WT | Other   | WT  | Primary            |   |   |   |    |
| Calu-6  | Low | 61 | C | F | ADN   | Mes |   | 314  | MUT | Other    | WT | WT      | WT  | Primary            |   |   |   |    |
| EKVX    | Low |    |   | M | ADN   | Mes |   | 617  | MUT | WT       | MS | WT      | WT  |                    |   |   |   |    |
| H1048   | Low | 53 |   | F | SCLC  | Epl |   | 995  | MUT | WT       | WT | WT      | WT  | Distant Metastasis |   | N | N |    |
| H1395   | Low | 55 | C | F | ADN   | Mes | Y | 208  | WT  | WT       | FS | WT      | WT  | Primary            | 2 | N | N |    |
| H157    | Low | 59 | C | M | SCC   | Mes | Y | 1608 | MUT | Codon 12 | WT | WT      | MUT | Distant Metastasis | 3 | N | N | PD |
| H1734   | Low | 56 | C | F | ADN   | Mes |   | 715  | MUT | Codon 13 | FS | WT      | WT  | Primary            |   | N | N |    |
| H2073   | Low | 47 | C | F | ADN   | Mes | Y | 487  | MUT | WT       | NS | WT      | WT  | Primary            | 3 | Y | N |    |
| H2086   | Low | 45 |   | M | ADN   | Epl |   | 460  | MUT | WT       | WT | WT      | WT  | Lymph Node         |   | N | N |    |
| H441    | Low | 33 |   | M | ADN   | Epl |   | 768  | MUT | Codon 12 | WT | WT      | WT  | Distant Metastasis | 3 | N | N |    |
| H446    | Low | 61 | C | M | SCLC  | Mes |   | 866  | MUT | WT       | WT | WT      | WT  | Distant Metastasis |   |   |   |    |
| H838    | Low | 59 | C | M | ADN   | Mes | Y | 680  | MUT | WT       | FS | WT      | MUT | Lymph Node         | 3 | N | N |    |
| HCC15   | Low | 55 | B | M | SCC   | Mes |   | 674  | MUT | WT       | WT | WT      | WT  | Lymph Node         |   |   |   |    |
| HCC1833 | Low | 69 | C | F | ADN   | Epl |   | 394  | MUT | WT       | MS | WT      | WT  | Primary            |   |   |   |    |
| HCC193  | Low | 71 | C | F | ADN   | Epl |   | 263  | MUT | WT       | WT | WT      | WT  | Distant Metastasis |   |   |   |    |
| HCC4087 | Low | 82 | C | F | ADSQ  |     | Y | 235  | MUT | Codon 13 | WT | WT      | MUT |                    |   |   |   |    |
| HCC446  | Low | 49 |   | F | ADN   |     |   | 161  | MUT | WT       | WT | WT      | WT  | Primary            |   |   |   |    |
| Calu-1  | Low | 47 | C | M | MEC   | Mes |   | 383  | MUT | Codon 12 | WT | WT      | WT  | Distant Metastasis |   |   |   |    |
| DFC1024 | Low |    |   | F | ADN   | Mes | N | 477  | WT  | Codon 12 | WT | WT      | MUT |                    |   |   |   |    |
| H1573   | Low | 35 | C | F | ADN   | Epl | Y | 1526 | MUT | Codon 12 | MS | WT      | MUT | Distant Metastasis | 4 | N | Y |    |
| H1755   | Low | 65 | C | F | ADN   | Epl | Y | 491  | MUT | WT       | MS | WT      | MUT | Distant Metastasis | 4 | N | N |    |
| H1975   | Low |    |   | F | ADN   | Epl | N | 450  | MUT | WT       | WT | Exon 20 | WT  | Primary            |   | N | N |    |
| H2087   | Low | 69 | C | M | ADN   | Epl | Y | 602  | MUT | WT       | WT | WT      | WT  | Lymph Node         | 1 | N | N | PD |
| H2172   | Low |    |   | F | NSCLC | Mes |   | 1623 | MUT | WT       | HD | Other   | MUT | Primary            |   | N | N |    |
| H2347   | Low | 54 | C | F | ADN   | Epl |   | 919  | MUT | Codon 13 | WT | WT      | WT  | Primary            | 1 | N | N |    |
| H2887   | Low | 31 |   | M | NSCLC | Mes |   | 152  | MUT | Codon 12 | WT | WT      | WT  |                    | 4 |   |   |    |
| H647    | Low | 56 | C | M | ADSQ  | Epl | N | 407  | MUT | Codon 13 | SS | WT      | MUT | Distant Metastasis | 3 | N | Y |    |
| H650    | Low |    |   | M | ADN   | Mes | N | 2077 | MUT | Other    | WT | WT      | WT  | Lymph Node         |   | N | N |    |
| H661    | Low | 43 | C | M | LCC   | Mes |   | 791  | MUT | WT       | WT | WT      | MUT | Lymph Node         | 3 | Y | Y | MR |
| H920    | Low | 44 | C | M | ADN   | Mes | Y | 1288 | MUT | WT       | WT | WT      | MUT | Lymph Node         | 4 | N | Y | PD |



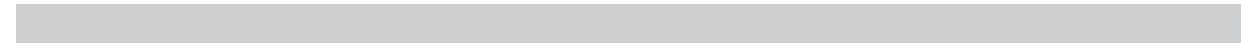

|           |     |    |   |   |                     |     |   |     |     |          |    |    |    |                    |   |  |  |  |
|-----------|-----|----|---|---|---------------------|-----|---|-----|-----|----------|----|----|----|--------------------|---|--|--|--|
| HCC2374   | Low | 69 | B | F | LCN                 | Epi |   | 806 | MUT | Codon 12 | WT | WT | WT | Primary            |   |  |  |  |
| HCC95     | Low | 65 | C | M | SCC                 | Epi |   | 288 | MUT | WT       | WT | WT | WT | Distant Metastasis | 4 |  |  |  |
| HSAEC1-KT | Low | 22 | B | M | Immortalized Benign |     | Y |     | WT  | WT       | WT | WT | WT |                    |   |  |  |  |

697

698 **Legend:** C = Caucasian, B = Black, M = Male, F = Female, ADN = adenocarcinoma, MEC =  
699 Muco-epidermoid carcinoma, LCN = Large cell neuroendocrine, ADSQ = adenosquamous, SCC  
700 = Squamous cell carcinoma, LCC = Large cell, M = Mesothelioma, NSCLC = Non-small cell  
701 lung cancer, SCLC = Small cell lung cancer, P = Primary site, L = Lymph node metastasis, M =  
702 Metastasis/Malignant pleural/pericardial effusion, Mes = Mesenchymal, Epi = Epithelial, TMB =  
703 Total mutational burden, Y = Yes, N = No, WT = Wild Type, MUT = Mutant, Codon 12 = KRAS  
704 Codon 12 mutant, Codon 13 = KRAS Codon 13 mutant, HD = Homozygous deletion, NS =  
705 Nonsense substitution, FS = Frameshift substitution, MS = Missense substitution, SS = Splice  
706 site mutation, Exon 19 = *EGFR* Exon 19 mutant, Exon 20 = *EGFR* Exon 20 mutant, Exon 21 =  
707 *EGFR* Exon 21 mutant, Other = alternative mutation sites; PR = Partial response; PD =  
708 Progressive disease; ND = No disease; MR = Metabolic response; Blank cells indicate  
709 unavailable data

710

711

712

713

714

715

716

717

718

719 **Supplemental Table S2:** Transcriptome and DNA mutation profile-matched TCGA-deposited  
720 NSCLC clinical samples to patient-derived NSCLC samples studied in the co-culture model.  
721 Lung cancer cell lines were matched to patient-derived lung tumor specimens from the TCGA  
722 NSCLC datasets using RNAseq expression and somatic mutation data (**Supplemental**  
723 **Methods**). Specifically, the best tumor specimen match for each cell line was chosen based on  
724 the Pearson correlation of 2000 genes together with a mutation similarity score for 700 cancer-  
725 related genes.

| Cell line | TCGA-Matched Patient Sample |
|-----------|-----------------------------|
| H596      | TCGA-66-2759-01             |
| HCC827    | TCGA-75-6203-01             |
| HOP-62    | TCGA-64-5775-01             |
| H1373     | TCGA-38-4629-01             |
| H1693     | TCGA-J2-A4AD-01             |
| HCC515    | TCGA-05-4395-01             |
| HCC3051   | TCGA-22-0944-01             |
| HCC44     | TCGA-05-4395-01             |
| H1650     | TCGA-75-6207-01             |
| H1355     | TCGA-05-4415-01             |
| H2122     | TCGA-05-4415-01             |
| H2009     | TCGA-55-A493-01             |
| HCC2108   | TCGA-05-4415-01             |
| H2258     | TCGA-62-A46Y-01             |
| H2030     | TCGA-05-4415-01             |
| H1437     | TCGA-50-5939-01             |
| H820      | TCGA-95-8494-01             |
| EKVX      | TCGA-MP-A4TA-01             |
| H1792     | TCGA-05-4395-01             |
| HCC461    | TCGA-55-8090-01             |
| HCC1171   | TCGA-MP-A4T4-01             |
| H1993     | TCGA-55-7913-01             |
| H23       | TCGA-05-4415-01             |
| H441      | TCGA-95-7567-01             |
| H2085     | TCGA-97-8175-01             |
| H1819     | TCGA-60-2711-01             |
| H647      | TCGA-05-4395-01             |
| H2887     | TCGA-05-4433-01             |
| H2073     | TCGA-05-4415-01             |
| HCC95     | TCGA-43-6770-01             |
| Calu-6    | TCGA-95-8494-01             |

|       |                 |
|-------|-----------------|
| H2347 | TCGA-95-7567-01 |
| H1734 | TCGA-05-4415-01 |
| H1755 | TCGA-66-2754-01 |
| H2087 | TCGA-95-8494-01 |
| HCC15 | TCGA-05-4415-01 |

726  
727

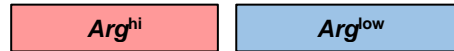

728 **Supplemental Materials and Methods**

729

730 **Fingerprinting ID**

731 All cell lines were verified by DNA fingerprinting with the Promega Fusion system (Cat#  
732 DC2408) which consists of 24 short tandem repeat (STR) markers. These loci collectively  
733 provide a genetic profile with a random match probability of  $10^{-28}$ . Fingerprints were compared  
734 against our database of more than 10,000 reference fingerprints that were collected from ATCC  
735 ([www.atcc.org](http://www.atcc.org)), DSMZ ([www.dsmz.de](http://www.dsmz.de)), JCRB ([cellbank.nibiohn.go.jp](http://cellbank.nibiohn.go.jp)), RIKEN ([en.brc.riken.jp](http://en.brc.riken.jp)),  
736 Cellosaurus ([web.expasy.org/cellosaurus](http://web.expasy.org/cellosaurus)), and from our own resources. <sup>42</sup> A match is called  
737 between two fingerprints when at least 80% of the alleles are identical according to the shared  
738 allele match algorithm defined by the International Cell Line Authentication Committee.

739

740 **qPCR**

741 RNA was extracted with the RNeasy Mini Kit (QIAGEN) and QIAcube robot (QIAGEN) following  
742 the manufacturer's recommended protocol. 1  $\mu$ g of total RNA was mixed with qScript cDNA  
743 SuperMix for cDNA synthesis (BioRad) per the manufacturer's protocol. After reverse  
744 transcription, qRT-PCR was performed with SYBR Green (BioRad) following the manufacturer's  
745 recommended protocol for marker (*Actin*, *iNos*, *Ii6*, *Arg1*, *Ym-1*, *Il-1b*, *Socs3*). Mouse specific  
746 primers were used to ensure only macrophage transcripts would be detected. All primers were

747 cross-examined for no activity on human RNA. qRT-PCR was performed on a CFX384 Touch  
 748 Real-Time PCR Detection System (BioRad). The cycling program was 95°C for 10 min, 95°C for  
 749 15 s, and 60°C for 40 cycles. Each sample was run in quadruplicate, normalized to the actin  
 750 probe, and then normalized to macrophage baseline, and analyzed by the comparative CT  
 751 method.

**Supplemental Table S3: Primers**

| Gene Name                     | Forward Primer           | Reverse Primer         |
|-------------------------------|--------------------------|------------------------|
| <i>Actin</i>                  | CTGAGAGGGAAATCGTGCGT     | AGGGTGTA AACGCAGCTCAG  |
| <i>Arginase-1</i>             | CTCCAAGCCAAAGTCCTTAGAG   | AGGAGCTGTCATTAGGGACATC |
| <i>iNOS</i>                   | G TTCAGCTACGCCTTCAACAC   | CAAGGCCAAACACAGCATAACC |
| <i>Il-6</i>                   | CGTGGAATGAGAAAAGAGTTGTGC | TGGTACTCCAGAAGACCAGAGG |
| <i>Ym-1</i>                   | TCTGGGTACAAGATCCCTGAA    | TTTCTCCAGTGTAGCCATCCTT |
| <i>Il-1<math>\beta</math></i> | TGCCACCTTTTGACAGTGATG    | TTCTTGTGACCCTGAGCGAC   |
| <i>Socs3</i>                  | CAAAAATCCAGCCCCAACGG     | GGCTGGCTCCACTTGAAAGA   |

752

753

754 **qPCR data processing and analysis**

755 All qPCR processing was completed in R (see **Supplemental File 2: “Co-culture qPCR R**  
 756 **code.R”**). All PCR results were first combined in a single table containing 7 columns  
 757 (**Supplemental File 3: “Co-culture qPCR raw data”-Note: available on request**): Group  
 758 (which refers to different PCR plate results analyzed together as a biological replicate group),  
 759 Plate (name of the PCR plate), Plate\_Sort (for sorting plates by date), Well, Target, Sample,  
 760 and Cq. Technical replicates for each assay within each plate were averaged, excluding Cq  
 761 values = 40, unless all such values for a given assay were 40. The resulting average was called

762 Cq\_mean. Next, for each sample within each plate, the Cq\_mean values (there is one for each  
763 target) were normalized to the Cq\_mean of *Actin* for that sample. Specifically, for sample “x”  
764 and target “y”, the *Actin* normalized value equaled  $Cq\_mean(\text{sample } x, \text{target } y) -$   
765  $Cq\_mean(\text{sample } x, \textit{Actin})$ . These normalized values were generally positive since *Actin* is  
766 highly expressed (lower Cq value). However, these values were discarded when *Actin* Cq > 25  
767 as these indicated a problem with the PCR assay. We then normalized each sample to the  
768 macrophage sample control, of which there was one per group (one group may comprise  
769 multiple plates). If an assay was done on more than one plate within a group, the median of its  
770 normalized values was used (called act\_norm\_Cq\_median). Thus, for sample x and target y, the  
771 macrophage normalized values =  $act\_norm\_Cq\_median(\text{sample } x, \text{target } y) -$   
772  $act\_norm\_Cq\_median(\text{macrophage control}, \text{target } y)$ . These values (called mac\_norm Cq) may  
773 be either positive (higher expression in the macrophage control), or negative (higher expression  
774 in the test sample). The final results were calculated as  $2^{-(\text{mac\_norm\_Cq})}$  and represent  
775 expression fold change compared to the macrophage control (**Supplemental File 4: “Co-**  
776 **culture qPCR processed data”- Note: available on request**). Box plots of negative  
777 mac\_norm\_Cq values were generated for each sample and target, with the datapoints  
778 representing the biological replicates (**Supplemental File 1: “Co-culture qPCR box plots “**).  
779 The standard deviation for *Arginase-1* expression was calculated for each sample, to show  
780 reproducibility for this gene (**Supplemental File 5: “Co-culture qPCR box plots - arginase**  
781 **summary” and Supplemental Figure 1A**). A heatmap shows the group mean values for each  
782 sample-target pair (same as the mean of each box plot) (**Supplemental File 6: “Co-culture**  
783 **qPCR processed data for heatmap” and Figure 2.C**).

784

785 **DNA/RNA extraction for sequencing**

786 DNA for exome or genome sequencing was purified from frozen cell line pellets using DNeasy  
787 reagents and protocols with QIAcube robot (QIAGEN). DNA spectra were quantitated using  
788 spectrophotometer (Nanodrop) and samples diluted with nuclease free water (Ambion). Cell  
789 lines were grown to approximately 70%–80% confluence, washed 2X with PBS and directly  
790 lysed from culture flasks using RLT buffer (QIAGEN). Lysates were snap frozen and stored at -  
791 80°C. RNA was purified from lysates using RNeasy kit and QIAcube robot (QIAGEN).

792

### 793 **RNA sequencing**

794 RNA samples isolated from multicellular co-cultures experiments were submitted to Novogene  
795 genome sequencing company (Sacramento, CA) or UT Southwestern Next Generation  
796 Sequencing Core. The processing centers performed quantitative and qualitative assessment of  
797 the RNA samples including the RNA integrity and contamination. Novogene prepared the  
798 libraries using poly-Y oligoattached magnetic beads. UTSW NGSC prepared the libraries with  
799 Illumina's TruSeq Stranded mRNA library prep kit (Illumina, catalog # RS-122-2101) following  
800 manufacturer protocols. Novogene sequenced the libraries on the their HiSeq/MiSeq Illumina  
801 machines with 150 nucleotide paired-end reads for an average of 60 million total reads. UTSW  
802 NGSC sequenced the libraries with the Illumina NextSeq 500 using V2 reagents and 75  
803 nucleotide single-end reads for an average of 50 million reads. Reads were aligned to the  
804 human reference genome GRCh38 and/or mouse reference genome GRCm38 using STAR-2.7  
805 (<https://github.com/alexdobin/STAR>) followed by read duplicate removal with MarkDuplicates  
806 (gatk-4.1.2.0; <https://gatk.broadinstitute.org>). For co-culture samples, human reads were  
807 removed by comparing alignment scores (AS flags in bam files) in the human and mouse  
808 alignments: reads for which the human AS value was higher than the mouse AS value were  
809 removed (gatk-4.1.2.0 FilterSamReads). FPKM values were generated with cufflinks-2.2.1  
810 (<http://cole-trapnell-lab.github.io/cufflinks/>). These were then normalized (upper-quartile

811 normalization: Bullard et al, Bioinformatics 2010, 11:94), and log-transformed. The bulk RNAseq  
812 data will be available GEO accession number GSE200627.

813

#### 814 **TCGA Matchup**

815 We compared each lung cancer cell line with each lung tumor from the TCGA NSCLC datasets  
816 using RNAseq expression and somatic mutation data. The expression similarity measure was  
817 the Pearson correlation (between the tumor lines and the TCGA samples) on the 2,000 most  
818 variably expressed genes (derived from the combined cell line and TCGA RNAseq datasets)  
819 while the mutation similarity measure used a concordance value on 700 cancer genes (Cancer  
820 Gene Census, COSMIC, <https://cancer.sanger.ac.uk/census> ) defined as the number of genes  
821 mutated in both cell line and TCGA samples divided by the number of genes mutated in either  
822 sample (with genes weighted by their mutation frequency in the tumor sets). Note: the R code  
823 for this matchup algorithm is available upon request ([luc.girard@utsouthwestern.edu](mailto:luc.girard@utsouthwestern.edu)) to allow  
824 anyone to repeat this analyses. A combined score showed the degree of similarity between  
825 these cell lines and TCGA specimen is available Bulk RNA sequencing from TCGA matched  
826 samples were processed using CIBERSORT to deconvolute relative immune cell populations  
827 within the TME. <sup>22</sup>

828

#### 829 **Human umbilical cord blood sample processing**

830 Human umbilical cord blood samples were obtained from UT Southwestern-Parkland Memorial  
831 Hospital, in compliance with all associated regulations and approvals of use regarding human  
832 cord blood (STU: 112010-047) at UT Southwestern Medical Center. Sterile blood was obtained  
833 at the time of cesarean section from de-identified human umbilical cords that are normally  
834 discarded. The procedure is approved through a protocol exempt from informed consent as

835 approved by the UT Southwestern Medical Center Institutional Review Board and the Office for  
836 Human Research Protections (OHRP) supported by the U.S. Department of Health and Human  
837 Services. To ensure anonymity, links between the donor's medical and social histories including  
838 fetal sex are not maintained.

839

840 **Primary human umbilical cord blood-derived monocyte isolation and macrophage**  
841 **differentiation**

842 Mononuclear cells were isolated through Ficoll (Cytiva, Cat# 17544203) differential  
843 centrifugation. Harvested mononuclear cells were then subjected to washing and red blood cell  
844 lysis. Human primary monocytes were then negatively enriched through immunomagnetic  
845 selection (Stem Cell Technologies, Cat# 19359). Isolated human primary monocytes were then  
846 seeded at  $1 \times 10^6$  cells/ml in a 10-cm petri dish cultured with RPMI1640 (Millipore Sigma,  
847 R8758) supplemented with 10% heat deactivated FBS (ThermoFisher Scientific, Cat#  
848 26140079) to avoid potential immunogenicity. Human M-CSF (50 ng/ml) was supplemented to  
849 the medium to allow macrophage induction every 2 days for 7 days. Macrophages alone were  
850 seeded at  $1.0 \times 10^5$  cells per well, similar to the mouse-macrophage co-culture protocol. Positive  
851 controls for M1 and M2 polarization were established with LPS (20 ng/mL, 4-hour stimulation)  
852 and IL-4 (20 ng/mL, 18-hour stimulation), respectively. Co-culture replicates were established  
853 with identical proportions of patient-derived NSCLC cells, CAFs, and macrophages as the  
854 mouse-macrophage co-culture model.

855

856 **Flow Cytometry Analysis**

857 Co-cultured cells were scraped and collected from media. Samples were incubated with human  
858 anti-Fc blocker (BD Biosciences, Cat# 564220) for 15 min at 4°C to block potential non-specific



859 binding of conjugated antibodies. Anti-human CD45, Pacific Blue (Biolegend, Cat# 304021),  
860 anti-human CD68 (pan-macrophage marker), PE-Cyanine 7 (BD Biosciences, Cat# 565595),  
861 and anti-human CD206 (M2-like phenotype marker), APC (BD Bioscience, Cat# 321138) were  
862 incubated with harvested co-culturing cells for 30 min at 4°C. Fixable viability Dye eFluor 780  
863 (eBioscience, Cat# 65-0865-18) was used to exclude dead cells. Data were collected and  
864 analyzed on CytoFLEX flow cytometer (Beckman Coulter Inc.) and associated software.  
865 Unstained samples and tumor cell only samples were used for gating out negative populations.

866

### 867 **Immunohistochemistry (IHC) and quantification**

868 For IHC, tumors were fixed in 10% Formalin (VWR, catalog # 89370-094) for 72 hours with  
869 slight agitation at RT, then embedded in paraffin, sectioned into 5-micron slices and placed onto  
870 positively charged slides. Immunohistochemistry (IHC) was performed as previously described.  
871 <sup>20</sup> Slides were heated at 60°C for 10 minutes, deparaffinized and rehydrated. Antigen retrieval  
872 was performed with a Biocare Medical Decloaking Chamber at 110°C for 17 minutes using  
873 Antigen Unmasking Solution, TRIS-BASED (Fisher Scientific, catalog # NC9800748) then  
874 allowed to cool to room temperature for 30 minutes. Slides were washed for 5 minutes with  
875 PBS, incubated in ice-cold 10% methanol for 10 minutes at room temperature, washed with de-  
876 ionized water for 5 minutes, then tissue was blocked for 30 minutes using appropriate blocking  
877 solution. Blocking buffer was removed, then primary antibody diluted in Renaissance Buffer  
878 (BioCare Catalog # PD905 L) and added to samples at 4°C overnight with agitation. Samples  
879 were washed 3 times with 0.5% PBST for 5 minutes, once with PBS for 5 minutes, then  
880 secondary antibody solution was added for 30 minutes with agitation at room temperature.  
881 Samples were washed once with 0.2% PBST for 5 minutes, twice with 0.5% PBST for 5  
882 minutes, then a solution of 1:250 with the appropriate opal dye in 1X Plus Amplification Diluent  
883 (PerkinElmer, catalog # FP1498) was made and added to samples for 3 minutes. After 3

884 minutes, the solution was quickly aspirated and washed with .05% PBST 3 times, then washed  
885 with PBS + 2 mM EDTA for 10 minutes. Sub-sequential staining rounds follow the same  
886 protocol for each stained marker, apart from Antigen Unmasking Solution, citrate-based (Fisher  
887 Scientific, catalog # H-3300) is used instead of Antigen Unmasking Solution, TRIS-BASED  
888 (Fisher Scientific, catalog # NC9800748). The final staining round DAPI was added during the  
889 secondary incubation at 1 ug/mL concentration. Slides were then mounted with Vectamount AQ  
890 Aqueous Mounting Medium (Fisher Scientific catalog # H550160) and cover slipped (VWR  
891 catalog # 48404-133). Images were captured at 40X magnification using Vectra Polaris Slide  
892 Scanner (AKOYA Biosciences, Delaware, USA). Images were then deconvoluted and re-  
893 stitched using Phenochart and inForm software (Akoya Biosciences). The reconstituted images  
894 underwent multiplex quantitative analysis using HALO software (Akoya Biosciences). Tumor  
895 borders, regions of necrosis, and visible stroma were annotated and cross-checked to each  
896 tissue's associated H&E stain. For individual macrophage subtype characterization, Arginase-  
897 1(+) macrophages were characterized as F4/80+/ARG (+). Primary tumor cells were marked as  
898 pan-cytokeratin (+). All nuclei were identified with DAPI staining. Cell quantity, distribution in the  
899 tumor area, and density of each subtype of macrophage were analyzed for the overall tumor  
900 area, areas of necrosis, and stromal regions. Spatial infiltrative analyses into regions of necrosis  
901 or stroma were also conducted. Quantitative data were abstracted from analyses from each  
902 tumor section and analyzed on GraphPad Prism statistical analysis software (GraphPad  
903 Software, CA, USA). Quantitative IHC cell count and density analyses were conducted using  
904 Mann-Whitney U non-parametric Y-tests.

905 Tissue was stained with multiple rounds of antigen retrieval.

906 **1st:** Blocking buffer = Rodent Block (Biocare Medical catalog # RBM961H), Primary = Pan-  
907 Cytokeratin (Fisher Scientific # NC0581968, 1:300), Secondary = anti-Mouse HRP (Fisher  
908 Scientific # NC0141382), Opal – Opal 520 (Perkin Elmer # FP1487001KT)

909 **2nd:** Blocking Buffer = 2.5% Goat Serum (Fisher Scientific # NC0533036), Primary = Arginase1  
910 (Cell Signaling # 936685, 1:500), Secondary = anti-Rabbit HRP (Fisher Scientific # MP-7451),  
911 Opal = Opal 570 (Perkin Elmer # FP1488001KT)  
912 **3rd:** Blocking Buffer = 2.5% Goat Serum (Fisher Scientific # NC0533036), Primary = F4/80  
913 (Fisher Scientific # NC1397643, 1:500), Secondary = anti-Rabbit HRP (Fisher Scientific # MP-  
914 7451), Opal = Opal 620 (Fisher Scientific # NC1612059)  
915 **4th:** DAPI (Sigma Aldrich # D9542-10MG) added to secondary block solution for the final round  
916 of staining for nuclear identification  
917  
918
